# Supplementary material for: Elevational gradient of Hemiptera (Heteroptera, Auchenorrhyncha) on a tropical mountain in Papua New Guinea
Source: PeerJ. 2015 Jun 2;3:e978. doi: 10.7717/peerj.978 (PMC4458135; doi:10.7717/peerj.978)
Supplement: Supplemental Information 1 [file peerj-03-978-s001.xlsx]

## Sheet: Wanang
					Key to the code	MAL: Malaise - WAN: Wanang - D: plot - xx/16: day xx/16 - dxx: day xx
Tube Code	Taxa	Species	abundance	Site	Method	Short sample code	Val number	Altitud (m)	detailed sample code
TS00001	Cercopidae	Sp 1	1	Wanang	Malaise	P0542	16756	200	MAL-WAN-D-11/16-d11
TS00002	Cercopidae	Sp 2	1	Wanang	Malaise	P0542	16756	200	MAL-WAN-D-11/16-d11
TS00003	Fulgoromorpha	Sp 3	1	Wanang	Malaise	P0545	15490	200	MAL-WAN-D-14/16-d14
TS00004	Cicadellidae	Sp 4	23	Wanang	Malaise	P0545	15455	200	MAL-WAN-D-14/16-d14
TS00005	Heteroptera	Sp 5	1	Wanang	Malaise	P0545	15455	200	MAL-WAN-D-14/16-d14
TS00006	Cicadellidae	Sp 6	3	Wanang	Malaise	P0545	15455	200	MAL-WAN-D-14/16-d14
TS00007	Cicadellidae	Sp 7	2	Wanang	Malaise	P0545	15455	200	MAL-WAN-D-14/16-d14
TS00008	Cixiidae	Sp 8	1	Wanang	Malaise	P0545	15455	200	MAL-WAN-D-14/16-d14
TS00009	Cicadellidae	Sp 9	1	Wanang	Malaise	P0545	15455	200	MAL-WAN-D-14/16-d14
TS00010	Heteroptera	Sp 10	1	Wanang	Malaise	P0545	15455	200	MAL-WAN-D-14/16-d14
TS00011	Cicadellidae	Sp 11	2	Wanang	Malaise	P0545	15455	200	MAL-WAN-D-14/16-d14
TS00012	Cicadellidae	Sp 12	3	Wanang	Malaise	P0545	15455	200	MAL-WAN-D-14/16-d14
TS00013	Cicadellidae	Sp 13	1	Wanang	Malaise	P0545	15455	200	MAL-WAN-D-14/16-d14
TS00014	Cicadellidae	Sp 14	1	Wanang	Malaise	P0545	15455	200	MAL-WAN-D-14/16-d14
TS00015	Derbidae	Sp 15	1	Wanang	Malaise	P0545	15455	200	MAL-WAN-D-14/16-d14
TS00016	Cicadellidae	Sp11	15	Wanang	Malaise	P0538	16811	200	MAL-WAN-D-07/16-d07
TS00017	Cicadellidae	Sp16	3	Wanang	Malaise	P0538	16811	200	MAL-WAN-D-07/16-d07
TS00018	Achilidae	Sp17	1	Wanang	Malaise	P0538	16811	200	MAL-WAN-D-07/16-d07
TS00019	Achilidae	Sp18	1	Wanang	Malaise	P0538	16811	200	MAL-WAN-D-07/16-d07
TS00020	Cicadellidae (Larve)	Sp19	1	Wanang	Malaise	P0538	16811	200	MAL-WAN-D-07/16-d07
TS00021	Derbidae (+parasite)	Sp20	1 (1)	Wanang	Malaise	P0538	16811	200	MAL-WAN-D-07/16-d07
TS00022	Cicadellidae	Sp21	1	Wanang	Malaise	P0538	16811	200	MAL-WAN-D-07/16-d07
TS00023	Derbidae	Sp22	1	Wanang	Malaise	P0538	16811	200	MAL-WAN-D-07/16-d07
TS00024	Cicadellidae	Sp23	1	Wanang	Malaise	P0538	16811	200	MAL-WAN-D-07/16-d07
TS00025	Cicadellidae	Sp24	1	Wanang	Malaise	P0538	16811	200	MAL-WAN-D-07/16-d07
TS00026	Cicadellidae	Sp12	2	Wanang	Malaise	P0538	16811	200	MAL-WAN-D-07/16-d07
TS00027	Cicadellidae	Sp25	2	Wanang	Malaise	P0538	16811	200	MAL-WAN-D-07/16-d07
TS00028	Derbidae	Sp26	1	Wanang	Malaise	P0538	16811	200	MAL-WAN-D-07/16-d07
TS00029	Cicadellidae	Sp4	7	Wanang	Malaise	P0538	16811	200	MAL-WAN-D-07/16-d07
TS00030	Cixiidae	Sp27	2	Wanang	Malaise	P0538	16811	200	MAL-WAN-D-07/16-d07
TS00031	Cicadellidae	Sp28	1	Wanang	Malaise	P0538	16811	200	MAL-WAN-D-07/16-d07
TS00032	Cicadellidae	Sp29	1	Wanang	Malaise	P0538	16811	200	MAL-WAN-D-07/16-d07
TS00033	Cicadellidae	Sp30	2	Wanang	Malaise	P0538	16811	200	MAL-WAN-D-07/16-d07
TS00034	Cicadellidae	Sp7	1	Wanang	Malaise	P0538	16811	200	MAL-WAN-D-07/16-d07
TS00035	Cicadellidae	Sp31	1	Wanang	Malaise	P0538	16811	200	MAL-WAN-D-07/16-d07
TS00036	Cicadellidae	Sp32	2	Wanang	Malaise	P0538	16811	200	MAL-WAN-D-07/16-d07
TS00037	Cicadellidae	Sp33	1	Wanang	Malaise	P0538	16811	200	MAL-WAN-D-07/16-d07
TS00038	Heteroptera	Sp34	1	Wanang	Malaise	P0538	16811	200	MAL-WAN-D-07/16-d07
TS00039	Heteroptera	Sp35	1	Wanang	Malaise	P0538	16811	200	MAL-WAN-D-07/16-d07
TS00040	Cicadellidae	Sp36	2	Wanang	Malaise	P0538	16811	200	MAL-WAN-D-07/16-d07
TS00041	Aleyrodidae	Sp51	1	Wanang	Malaise	P0538	16811	200	MAL-WAN-D-07/16-d07	Aleurode mâle
TS00042	Cicadellidae	Sp16	5	Wanang	Malaise	P0544	9084	200	MAL-WAN-D-13/16-d13
TS00043	Cicadellidae	Sp4	14	Wanang	Malaise	P0544	9084	200	MAL-WAN-D-13/16-d13
TS00044	Cicadellidae	Sp11	6	Wanang	Malaise	P0544	9084	200	MAL-WAN-D-13/16-d13
TS00045	Cicadellidae	Sp37	1	Wanang	Malaise	P0544	9084	200	MAL-WAN-D-13/16-d13
TS00046	Cixiidae	Sp27	1	Wanang	Malaise	P0544	9084	200	MAL-WAN-D-13/16-d13
TS00047	Cicadellidae	Sp25	2	Wanang	Malaise	P0544	9084	200	MAL-WAN-D-13/16-d13
TS00048	Cicadellidae	Sp33	2	Wanang	Malaise	P0544	9084	200	MAL-WAN-D-13/16-d13
TS00049	Cicadellidae	Sp38	2	Wanang	Malaise	P0544	9084	200	MAL-WAN-D-13/16-d13
TS00050	Cicadellidae	Sp39	1	Wanang	Malaise	P0544	9084	200	MAL-WAN-D-13/16-d13
TS00051	Cicadellidae	Sp14	1	Wanang	Malaise	P0544	9084	200	MAL-WAN-D-13/16-d13
TS00052	Cicadellidae	Sp40	1	Wanang	Malaise	P0544	9084	200	MAL-WAN-D-13/16-d13
TS00053	Cicadellidae	Sp41	2	Wanang	Malaise	P0544	9084	200	MAL-WAN-D-13/16-d13
TS00054	Cicadellidae	Sp29	3	Wanang	Malaise	P0544	9084	200	MAL-WAN-D-13/16-d13
TS00055	Derbidae	Sp20	1	Wanang	Malaise	P0544	9084	200	MAL-WAN-D-13/16-d13
TS00056	Heteroptera	Sp42	1	Wanang	Malaise	P0544	9084	200	MAL-WAN-D-13/16-d13
TS00057	Cicadellidae	Sp43	1	Wanang	Malaise	P0544	9084	200	MAL-WAN-D-13/16-d13
TS00058	Cicadellidae	Sp32	4	Wanang	Malaise	P0544	9084	200	MAL-WAN-D-13/16-d13
TS00059	Cicadellidae	Sp44	1	Wanang	Malaise	P0544	9084	200	MAL-WAN-D-13/16-d13
TS00060	Cicadellidae	Sp12	3	Wanang	Malaise	P0544	9084	200	MAL-WAN-D-13/16-d13
TS00061	Cicadellidae	Sp45	2	Wanang	Malaise	P0544	9084	200	MAL-WAN-D-13/16-d13
TS00062	Cicadellidae	Sp46	1	Wanang	Malaise	P0544	9084	200	MAL-WAN-D-13/16-d13
TS00063	Cicadellidae	Sp47	1	Wanang	Malaise	P0544	9084	200	MAL-WAN-D-13/16-d13
TS00064	Cicadellidae	Sp48	1	Wanang	Malaise	P0544	9084	200	MAL-WAN-D-13/16-d13
TS00065	Derbidae	Sp49	1	Wanang	Malaise	P0544	9084	200	MAL-WAN-D-13/16-d13
TS00066	Heteroptera	Sp50	1	Wanang	Malaise	P0544	9084	200	MAL-WAN-D-13/16-d13
TS00067	Heteroptera	Sp10	1	Wanang	Malaise	P0544	9084	200	MAL-WAN-D-13/16-d13
TS00068	Heteroptera	Sp52	1	Wanang	Malaise	P0544	9084	200	MAL-WAN-D-13/16-d13
TS00069	Heteroptera	Sp53	1	Wanang	Malaise	P0544	9084	200	MAL-WAN-D-13/16-d13
TS00070	Heteroptera	Sp54	1	Wanang	Malaise	P0544	9084	200	MAL-WAN-D-13/16-d13
TS00071	Cixiidae	Sp55	1	Wanang	Malaise	P0547	11070	200	MAL-WAN-D-16/16-d16
TS00072	Cicadellidae	Sp4	3	Wanang	Malaise	P0547	11070	200	MAL-WAN-D-16/16-d16
TS00073	Cicadellidae	Sp11	2	Wanang	Malaise	P0547	11070	200	MAL-WAN-D-16/16-d16
TS00074	Cicadellidae	Sp14	2	Wanang	Malaise	P0547	11070	200	MAL-WAN-D-16/16-d16
TS00075	Derbidae	Sp56	1	Wanang	Malaise	P0547	11070	200	MAL-WAN-D-16/16-d16
TS00076	Cicadellidae	Sp32	6	Wanang	Malaise	P0547	11070	200	MAL-WAN-D-16/16-d16
TS00077	Cicadellidae	Sp44	1	Wanang	Malaise	P0547	11070	200	MAL-WAN-D-16/16-d16
TS00078	Cixiidae	Sp27	1	Wanang	Malaise	P0547	11070	200	MAL-WAN-D-16/16-d16
TS00079	Cicadellidae	Sp25	1	Wanang	Malaise	P0547	11070	200	MAL-WAN-D-16/16-d16
TS00080	Cicadellidae	Sp40	1	Wanang	Malaise	P0547	11070	200	MAL-WAN-D-16/16-d16
TS00081	Cicadellidae	Sp45	1	Wanang	Malaise	P0547	11070	200	MAL-WAN-D-16/16-d16
TS00082	Heteroptera	Sp57	1	Wanang	Malaise	P0547	11070	200	MAL-WAN-D-16/16-d16
TS00083	Cicadellidae	Sp58	1	Wanang	Malaise	P0547	11070	200	MAL-WAN-D-16/16-d16
TS00084	Cicadellidae	Sp59	1	Wanang	Malaise	P0547	11070	200	MAL-WAN-D-16/16-d16
TS00085	Derbidae	Sp26	1	Wanang	Malaise	P0547	11070	200	MAL-WAN-D-16/16-d16
TS00086	Cicadellidae	Sp11	1	Wanang	Malaise	P4900	9004	200	MAL-WAN01-D01
TS00087	Cicadellidae	Sp4	6	Wanang	Malaise	P4900	9004	200	MAL-WAN01-D01
TS00088	Heteroptera	Sp60	1	Wanang	Malaise	P4900	9004	200	MAL-WAN01-D01
TS00089	Cicadellidae	Sp14	1	Wanang	Malaise	P4900	9004	200	MAL-WAN01-D01
TS00090	Cicadellidae	Sp12	1	Wanang	Malaise	P4900	9004	200	MAL-WAN01-D01
TS00091	Cicadellidae	Sp61	1	Wanang	Malaise	P4900	9004	200	MAL-WAN01-D01
TS00092	Cicadellidae	SP62	1	Wanang	Malaise	P4900	9004	200	MAL-WAN01-D01
TS00093	Cicadellidae	Sp12	6	Wanang	Malaise	P0546	15370	200	MAL-WAN-D-15/16-d15
TS00094	Cicadellidae	Sp4	18	Wanang	Malaise	P0546	15370	200	MAL-WAN-D-15/16-d15
TS00095	Cicadellidae	Sp32	3	Wanang	Malaise	P0546	15370	200	MAL-WAN-D-15/16-d15
TS00096	Heteroptera	Sp64	3	Wanang	Malaise	P0546	15370	200	MAL-WAN-D-15/16-d15
TS00097	Cixiidae	Sp27	1	Wanang	Malaise	P0546	15370	200	MAL-WAN-D-15/16-d15
TS00098	Cicadellidae	Sp21	2	Wanang	Malaise	P0546	15370	200	MAL-WAN-D-15/16-d15
TS00099	Heteroptera	Sp65	1	Wanang	Malaise	P0546	15370	200	MAL-WAN-D-15/16-d15
TS00100	Cicadellidae	Sp11	4	Wanang	Malaise	P0546	15370	200	MAL-WAN-D-15/16-d15
TS00101	Cicadellidae	Sp29	3	Wanang	Malaise	P0546	15370	200	MAL-WAN-D-15/16-d15
TS00102	Cicadellidae	Sp44	3	Wanang	Malaise	P0546	15370	200	MAL-WAN-D-15/16-d15
TS00103	Cicadellidae	Sp62	1	Wanang	Malaise	P0546	15370	200	MAL-WAN-D-15/16-d15
TS00104	Cicadellidae	Sp63	1	Wanang	Malaise	P0546	15370	200	MAL-WAN-D-15/16-d15
TS00105	Cicadellidae	Sp45	1	Wanang	Malaise	P0546	15370	200	MAL-WAN-D-15/16-d15
TS00106	Cicadellidae	Sp48	1	Wanang	Malaise	P0546	15370	200	MAL-WAN-D-15/16-d15
TS00107	Cicadellidae	Sp66	1	Wanang	Malaise	P0546	15370	200	MAL-WAN-D-15/16-d15
TS00108	Cicadellidae	Sp67	2	Wanang	Malaise	P0546	15370	200	MAL-WAN-D-15/16-d15
TS00109	Achilidae	Sp18	1	Wanang	Malaise	P0539	16844	200	MAL-WAN-D-08/16-d08
TS00110	Cicadellidae	Sp68	4	Wanang	Malaise	P0539	16844	200	MAL-WAN-D-08/16-d08
TS00111	Cicadellidae	Sp29	6	Wanang	Malaise	P0539	16844	200	MAL-WAN-D-08/16-d08
TS00112	Cicadellidae	Sp4	5	Wanang	Malaise	P0539	16844	200	MAL-WAN-D-08/16-d08
TS00113	Cicadellidae	Sp70	1	Wanang	Malaise	P0539	16844	200	MAL-WAN-D-08/16-d08
TS00114	Cicadellidae	Sp11	5	Wanang	Malaise	P0539	16844	200	MAL-WAN-D-08/16-d08
TS00115	Cicadellidae	Sp69	1	Wanang	Malaise	P0539	16844	200	MAL-WAN-D-08/16-d08
TS00116	Cicadellidae	Sp12	4	Wanang	Malaise	P0539	16844	200	MAL-WAN-D-08/16-d08
TS00117	Cicadellidae	Sp32	4	Wanang	Malaise	P0539	16844	200	MAL-WAN-D-08/16-d08
TS00118	Cicadellidae	Sp25	1	Wanang	Malaise	P0539	16844	200	MAL-WAN-D-08/16-d08
TS00119	Cicadellidae	Sp7	1	Wanang	Malaise	P0539	16844	200	MAL-WAN-D-08/16-d08
TS00120	Cicadellidae	SP71	1	Wanang	Malaise	P0539	16844	200	MAL-WAN-D-08/16-d08
TS00121	Cicadellidae	Sp72	1	Wanang	Malaise	P0539	16844	200	MAL-WAN-D-08/16-d08
TS00122	Heteroptera	Sp73	1	Wanang	Malaise	P0539	16844	200	MAL-WAN-D-08/16-d08
TS00123	Cicadellidae	Sp11	1	Wanang	Malaise	P4901	14818	200	MAL-WAN01-D02
TS00124	Derbidae	Sp74	1	Wanang	Malaise	P4901	14818	200	MAL-WAN01-D02
TS00125	Derbidae	Sp20	2	Wanang	Malaise	P4901	14818	200	MAL-WAN01-D02
TS00126	Cixiidae	Sp75	1	Wanang	Malaise	P4901	14818	200	MAL-WAN01-D02
TS00127	Cicadellidae	Sp12	5	Wanang	Malaise	P4901	14818	200	MAL-WAN01-D02
TS00128	Cicadellidae	Sp45	2	Wanang	Malaise	P4901	14818	200	MAL-WAN01-D02
TS00129	Cicadellidae	Sp4	4	Wanang	Malaise	P4901	14818	200	MAL-WAN01-D02
TS00130	Cicadellidae	Sp32	5	Wanang	Malaise	P4901	14818	200	MAL-WAN01-D02
TS00131	Heteroptera	Sp76	1	Wanang	Malaise	P4901	14818	200	MAL-WAN01-D02
TS00132	Delphacidae	Sp77	2	Wanang	Malaise	P4901	14818	200	MAL-WAN01-D02
TS00133	Derbidae	Sp78	1	Wanang	Malaise	P4901	14818	200	MAL-WAN01-D02
TS00134	Cicadellidae	Sp79	1	Wanang	Malaise	P4901	14818	200	MAL-WAN01-D02
TS00135	Cicadellidae	Sp80	1	Wanang	Malaise	P4901	14818	200	MAL-WAN01-D02
TS00136	Cicadellidae	Sp71	1	Wanang	Malaise	P4901	14818	200	MAL-WAN01-D02
TS00137	Heteroptera	Sp73	1	Wanang	Malaise	P4901	14818	200	MAL-WAN01-D02
TS00138	Achilidae	Sp81	1	Wanang	Malaise	P4901	14818	200	MAL-WAN01-D02
TS00139	Cicadellidae	Sp29	4	Wanang	Malaise	P4901	14818	200	MAL-WAN01-D02
TS00140	Cicadellidae	Sp82	1	Wanang	Malaise	P4901	14818	200	MAL-WAN01-D02
TS00141	Cicadellidae	Sp21	1	Wanang	Malaise	P4901	14818	200	MAL-WAN01-D02
TS00142	Cicadellidae	Sp44	1	Wanang	Malaise	P4901	14818	200	MAL-WAN01-D02
TS00143	Cicadellidae	Sp83	1	Wanang	Malaise	P4901	14818	200	MAL-WAN01-D02
TS00144	Fulgoridae	Sp84	1	Wanang	Malaise	P0540	16839	200	MAL-WAN-D-09/16-d09
TS00145	Cicadellidae	Sp4	8	Wanang	Malaise	P0540	16839	200	MAL-WAN-D-09/16-d09
TS00146	Cicadellidae	Sp11	2	Wanang	Malaise	P0540	16839	200	MAL-WAN-D-09/16-d09
TS00147	Cicadellidae	Sp29	4	Wanang	Malaise	P0540	16839	200	MAL-WAN-D-09/16-d09
TS00148	Cicadellidae	Sp25	3	Wanang	Malaise	P0540	16839	200	MAL-WAN-D-09/16-d09
TS00149	Cicadellidae	Sp68	3	Wanang	Malaise	P0540	16839	200	MAL-WAN-D-09/16-d09
TS00150	Derbidae	Sp20	3	Wanang	Malaise	P0540	16839	200	MAL-WAN-D-09/16-d09
TS00151	Cixiidae	Sp27	1	Wanang	Malaise	P0540	16839	200	MAL-WAN-D-09/16-d09
TS00152	Cicadellidae	Sp38	2	Wanang	Malaise	P0540	16839	200	MAL-WAN-D-09/16-d09
TS00153	Cicadellidae	Sp41	1	Wanang	Malaise	P0540	16839	200	MAL-WAN-D-09/16-d09
TS00154	Cicadellidae	Sp66	1	Wanang	Malaise	P0540	16839	200	MAL-WAN-D-09/16-d09
TS00155	Heteroptera	Sp34	1	Wanang	Malaise	P0540	16839	200	MAL-WAN-D-09/16-d09
TS00156	Cicadellidae	Sp7	3	Wanang	Malaise	P0541	16769	200	MAL-WAN-D-10/16-d10
TS00157	Cicadellidae	Sp25	5	Wanang	Malaise	P0541	16769	200	MAL-WAN-D-10/16-d10
TS00158	Cixiidae	Sp27	3	Wanang	Malaise	P0541	16769	200	MAL-WAN-D-10/16-d10
TS00159	Cicadellidae	Sp32	8	Wanang	Malaise	P0541	16769	200	MAL-WAN-D-10/16-d10
TS00160	Cicadellidae	Sp4	28	Wanang	Malaise	P0541	16769	200	MAL-WAN-D-10/16-d10
TS00161	Cicadellidae	Sp83	1	Wanang	Malaise	P0541	16769	200	MAL-WAN-D-10/16-d10
TS00162	Cicadellidae	Sp68	2	Wanang	Malaise	P0541	16769	200	MAL-WAN-D-10/16-d10
TS00163	Cicadellidae	Sp45	1	Wanang	Malaise	P0541	16769	200	MAL-WAN-D-10/16-d10
TS00164	Cicadellidae	Sp63	1	Wanang	Malaise	P0541	16769	200	MAL-WAN-D-10/16-d10
TS00165	Cicadellidae	Sp85	1	Wanang	Malaise	P0541	16769	200	MAL-WAN-D-10/16-d10
TS00166	Cicadellidae	Sp29	7	Wanang	Malaise	P0541	16769	200	MAL-WAN-D-10/16-d10
TS00167	Heteroptera	Sp34	1	Wanang	Malaise	P0541	16769	200	MAL-WAN-D-10/16-d10
TS00168	Cicadellidae	Sp16	1	Wanang	Malaise	P0541	16769	200	MAL-WAN-D-10/16-d10
TS00169	Heteroptera	Sp86	1	Wanang	Malaise	P0541	16769	200	MAL-WAN-D-10/16-d10
TS00170	Cicadellidae	Sp70	4	Wanang	Malaise	P0541	16769	200	MAL-WAN-D-10/16-d10
TS00171	Cicadellidae	Sp41	1	Wanang	Malaise	P0541	16769	200	MAL-WAN-D-10/16-d10
TS00172	Cicadellidae	Sp14	2	Wanang	Malaise	P0541	16769	200	MAL-WAN-D-10/16-d10
TS00173	Derbidae	Sp20	1	Wanang	Malaise	P0541	16769	200	MAL-WAN-D-10/16-d10
TS00174	Cicadellidae	Sp87	1	Wanang	Malaise	P0541	16769	200	MAL-WAN-D-10/16-d10
TS00175	Cicadellidae	Sp67	1	Wanang	Malaise	P0541	16769	200	MAL-WAN-D-10/16-d10
TS00176	Cicadellidae	Sp44	1	Wanang	Malaise	P0541	16769	200	MAL-WAN-D-10/16-d10
TS00177	Cicadellidae	Sp88	1	Wanang	Malaise	P0541	16769	200	MAL-WAN-D-10/16-d10
TS00178	Cicadellidae (larve)	Sp89	1	Wanang	Malaise	P0541	16769	200	MAL-WAN-D-10/16-d10
TS00179	Heteroptera	Sp90	1	Wanang	Malaise	P0541	16769	200	MAL-WAN-D-10/16-d10
TS00180	Heteroptera	Sp91	1	Wanang	Malaise	P0541	16769	200	MAL-WAN-D-10/16-d10
TS00181	Cicadellidae	Sp92	1	Wanang	Malaise	P0541	16769	200	MAL-WAN-D-10/16-d10
TS00182	Cercopidae	Sp1	1	Wanang	Malaise	P0543	16761	200	MAL-WAN-D-12/16-d12
TS00183	Cercopidae	Sp2	1	Wanang	Malaise	P0543	16761	200	MAL-WAN-D-12/16-d12
TS00184	Cicadellidae	Sp41	2	Wanang	Malaise	P0543	16759	200	MAL-WAN-D-12/16-d12
TS00185	Cicadellidae	Sp29	5	Wanang	Malaise	P0543	16759	200	MAL-WAN-D-12/16-d12
TS00186	Cicadellidae	Sp25	6	Wanang	Malaise	P0543	16759	200	MAL-WAN-D-12/16-d12
TS00187	Cicadellidae	Sp11	3	Wanang	Malaise	P0543	16759	200	MAL-WAN-D-12/16-d12
TS00188	Cicadellidae	Sp68	4	Wanang	Malaise	P0543	16759	200	MAL-WAN-D-12/16-d12
TS00189	Cicadellidae	Sp4	20	Wanang	Malaise	P0543	16759	200	MAL-WAN-D-12/16-d12
TS00190	Cicadellidae	Sp37	2	Wanang	Malaise	P0543	16759	200	MAL-WAN-D-12/16-d12
TS00191	Delphacidae	Sp93	1	Wanang	Malaise	P0543	16759	200	MAL-WAN-D-12/16-d12
TS00192	Fulgoromorpha (larve)	Sp94	1	Wanang	Malaise	P0543	16759	200	MAL-WAN-D-12/16-d12
TS00193	Cicadellidae	Sp39	1	Wanang	Malaise	P0543	16759	200	MAL-WAN-D-12/16-d12
TS00194	Cicadellidae	Sp32	9	Wanang	Malaise	P0543	16759	200	MAL-WAN-D-12/16-d12
TS00195	Cicadellidae	Sp95	1	Wanang	Malaise	P0543	16759	200	MAL-WAN-D-12/16-d12
TS00196	Cicadellidae	Sp72	1	Wanang	Malaise	P0543	16759	200	MAL-WAN-D-12/16-d12
TS00197	Heteroptera	Sp96	1	Wanang	Malaise	P0543	16759	200	MAL-WAN-D-12/16-d12
TS00198	Heteroptera	Sp97	2	Wanang	Malaise	P0543	16759	200	MAL-WAN-D-12/16-d12
TS00199	Cicadellidae	Sp92	1	Wanang	Malaise	P0543	16759	200	MAL-WAN-D-12/16-d12
TS00200	Cicadellidae	Sp45	2	Wanang	Malaise	P0543	16759	200	MAL-WAN-D-12/16-d12
TS00201	Cicadellidae	Sp98	1	Wanang	Malaise	P0543	16759	200	MAL-WAN-D-12/16-d12
TS00202	Derbidae	Sp20	1	Wanang	Malaise	P0543	16759	200	MAL-WAN-D-12/16-d12
TS00203	Cicadellidae	Sp99	1	Wanang	Malaise	P0543	16759	200	MAL-WAN-D-12/16-d12
TS00204	Cicadellidae	Sp100	1	Wanang	Malaise	P0543	16759	200	MAL-WAN-D-12/16-d12
TS00205	Cicadellidae	Sp101	1	Wanang	Malaise	P0543	16759	200	MAL-WAN-D-12/16-d12
TS00206	Cicadellidae	Sp102	1	Wanang	Malaise	P0543	16759	200	MAL-WAN-D-12/16-d12
TS00207	Stenorrhynque	Sp103	1	Wanang	Malaise	P0543	16759	200	MAL-WAN-D-12/16-d12
TS00208	Heteroptera	Sp104	1	Wanang	Malaise	P0543	16759	200	MAL-WAN-D-12/16-d12
TS00209	Fulgoromorpha (larve)	Sp105	1	Wanang	Malaise	P0543	16759	200	MAL-WAN-D-12/16-d12
TS00210	Fulgoromorpha (larve)	Sp106	1	Wanang	Malaise	P0543	16759	200	MAL-WAN-D-12/16-d12
TS00211	Cicadellidae	Sp92	2	Wanang	Malaise	P0537	16836	200	MAL-WAN-D-06/16-d06
TS00212	Cicadellidae	Sp29	13	Wanang	Malaise	P0537	16836	200	MAL-WAN-D-06/16-d06
TS00213	Cicadellidae	Sp4	46	Wanang	Malaise	P0537	16836	200	MAL-WAN-D-06/16-d06
TS00214	Cicadellidae	Sp12	5	Wanang	Malaise	P0537	16836	200	MAL-WAN-D-06/16-d06
TS00215	Cicadellidae	Sp107	1	Wanang	Malaise	P0537	16836	200	MAL-WAN-D-06/16-d06
TS00216	Heteroptera	Sp108	1	Wanang	Malaise	P0537	16836	200	MAL-WAN-D-06/16-d06
TS00217	Cicadellidae	Sp109	1	Wanang	Malaise	P0537	16836	200	MAL-WAN-D-06/16-d06
TS00218	Cicadellidae	Sp110	9	Wanang	Malaise	P0537	16836	200	MAL-WAN-D-06/16-d06
TS00219	Cicadellidae	Sp102	19	Wanang	Malaise	P0537	16836	200	MAL-WAN-D-06/16-d06
TS00220	Cixiidae	Sp111	1	Wanang	Malaise	P0537	16836	200	MAL-WAN-D-06/16-d06
TS00221	Achilidae	Sp18	1	Wanang	Malaise	P0537	16836	200	MAL-WAN-D-06/16-d06
TS00222	Cicadellidae	Sp68	8	Wanang	Malaise	P0537	16836	200	MAL-WAN-D-06/16-d06
TS00223	Cicadellidae	Sp45	4	Wanang	Malaise	P0537	16836	200	MAL-WAN-D-06/16-d06
TS00224	Cicadellidae	Sp112	4	Wanang	Malaise	P0537	16836	200	MAL-WAN-D-06/16-d06
TS00225	Cicadellidae	Sp25	1	Wanang	Malaise	P0537	16836	200	MAL-WAN-D-06/16-d06
TS00226	Cicadellidae	Sp63	1	Wanang	Malaise	P0537	16836	200	MAL-WAN-D-06/16-d06
TS00227	Cicadellidae	Sp32	4	Wanang	Malaise	P0537	16836	200	MAL-WAN-D-06/16-d06
TS00228	Cicadellidae	Sp11	4	Wanang	Malaise	P0537	16836	200	MAL-WAN-D-06/16-d06
TS00229	Cicadellidae	Sp113	1	Wanang	Malaise	P0537	16836	200	MAL-WAN-D-06/16-d06
TS00230	Cicadellidae	Sp7	2	Wanang	Malaise	P0537	16836	200	MAL-WAN-D-06/16-d06
TS00231	Cicadellidae	Sp41	2	Wanang	Malaise	P0537	16836	200	MAL-WAN-D-06/16-d06
TS00232	Cicadellidae	Sp21	2	Wanang	Malaise	P0537	16836	200	MAL-WAN-D-06/16-d06
TS00233	Cicadellidae	Sp16	1	Wanang	Malaise	P0537	16836	200	MAL-WAN-D-06/16-d06
TS00234	Cicadellidae	Sp114	1	Wanang	Malaise	P0537	16836	200	MAL-WAN-D-06/16-d06
TS00235	Cicadellidae	Sp62	1	Wanang	Malaise	P0537	16836	200	MAL-WAN-D-06/16-d06
TS00236	Cicadellidae	Sp115	1	Wanang	Malaise	P0537	16836	200	MAL-WAN-D-06/16-d06
TS00237	Cicadellidae	Sp116	1	Wanang	Malaise	P0537	16836	200	MAL-WAN-D-06/16-d06
TS00238	Cicadellidae	Sp117	1	Wanang	Malaise	P0537	16836	200	MAL-WAN-D-06/16-d06
TS00239	Cicadellidae	Sp118	1	Wanang	Malaise	P0542	16837	200	MAL-WAN-D-11/16-d11
TS00240	Heteroptera	Sp119	1	Wanang	Malaise	P0542	16837	200	MAL-WAN-D-11/16-d11
TS00241	Cicadellidae	Sp37	1	Wanang	Malaise	P0542	16837	200	MAL-WAN-D-11/16-d11
TS00242	Cicadellidae	Sp25	2	Wanang	Malaise	P0542	16837	200	MAL-WAN-D-11/16-d11
TS00243	Cicadellidae	Sp83	1	Wanang	Malaise	P0542	16837	200	MAL-WAN-D-11/16-d11
TS00244	Cicadellidae	Sp7	1	Wanang	Malaise	P0542	16837	200	MAL-WAN-D-11/16-d11
TS00245	Cicadellidae	Sp62	1	Wanang	Malaise	P0542	16837	200	MAL-WAN-D-11/16-d11
TS00246	Cicadellidae	Sp110	3	Wanang	Malaise	P0542	16837	200	MAL-WAN-D-11/16-d11
TS00247	Cicadellidae	Sp102	9	Wanang	Malaise	P0542	16837	200	MAL-WAN-D-11/16-d11
TS00248	Cicadellidae	Sp4	14	Wanang	Malaise	P0542	16837	200	MAL-WAN-D-11/16-d11
TS00249	Heteroptera	Sp104	3	Wanang	Malaise	P0542	16837	200	MAL-WAN-D-11/16-d11
TS00250	Cicadellidae	Sp16	2	Wanang	Malaise	P0542	16837	200	MAL-WAN-D-11/16-d11
TS00251	Cicadellidae	Sp29	7	Wanang	Malaise	P0542	16837	200	MAL-WAN-D-11/16-d11
TS00252	Heteroptera	Sp97	1	Wanang	Malaise	P0542	16837	200	MAL-WAN-D-11/16-d11
TS00253	Derbidae	Sp20	1	Wanang	Malaise	P0542	16837	200	MAL-WAN-D-11/16-d11
TS00254	Heteroptera	Sp120	1	Wanang	Malaise	P0542	16837	200	MAL-WAN-D-11/16-d11
TS00255	Cicadellidae	Sp11	5	Wanang	Malaise	P0542	16837	200	MAL-WAN-D-11/16-d11
TS00256	Cicadellidae	Sp114	2	Wanang	Malaise	P0542	16837	200	MAL-WAN-D-11/16-d11
TS00257	Cicadellidae	Sp45	1	Wanang	Malaise	P0542	16837	200	MAL-WAN-D-11/16-d11
TS00258	Cicadellidae	Sp72	1	Wanang	Malaise	P0542	16837	200	MAL-WAN-D-11/16-d11
TS00259	Derbidae	Sp121	1	Wanang	Malaise	P0542	16837	200	MAL-WAN-D-11/16-d11
TS00260	Cicadellidae	Sp7	3	Wanang	Malaise	P0542	16837	200	MAL-WAN-D-11/16-d11
TS00261	Cicadellidae	Sp88	2	Wanang	Malaise	P0542	16837	200	MAL-WAN-D-11/16-d11
TS00262	Cicadellidae	Sp41	1	Wanang	Malaise	P0542	16837	200	MAL-WAN-D-11/16-d11
TS00263	Cicadellidae	Sp63	1	Wanang	Malaise	P0542	16837	200	MAL-WAN-D-11/16-d11
TS00264	Cicadellidae	Sp32	1	Wanang	Malaise	P0542	16837	200	MAL-WAN-D-11/16-d11
TS00265	Cicadellidae	Sp122	1	Wanang	Malaise	P0542	16837	200	MAL-WAN-D-11/16-d11
TS00266	Heteroptera	Sp10	2	Wanang	Malaise	P0542	16837	200	MAL-WAN-D-11/16-d11
TS00267	Cicadellidae	Sp4	1	Wanang	Malaise	P4915	11069	200	MAL-WAN01-D16
TS00268	Cicadellidae	Sp14	2	Wanang	Malaise	P4915	11069	200	MAL-WAN01-D16
TS00269	Cicadellidae	Sp123	1	Wanang	Malaise	P4915	11069	200	MAL-WAN01-D16
TS00270	Cicadellidae	Sp32	1	Wanang	Malaise	P4915	11069	200	MAL-WAN01-D16
TS00271	Cicadellidae	Sp124	1	Wanang	Malaise	P4915	11069	200	MAL-WAN01-D16
TS00272	Cicadellidae	Sp101	1	Wanang	Malaise	P4915	11069	200	MAL-WAN01-D16
TS00273	Cicadellidae	Sp125	1	Wanang	Malaise	P4915	11069	200	MAL-WAN01-D16
TS00274	Cicadellidae	Sp13	1	Wanang	Malaise	P4915	11069	200	MAL-WAN01-D16
TS00275	Cicadellidae	Sp126	1	Wanang	Malaise	P4915	11069	200	MAL-WAN01-D16
TS00276	Derbidae	Sp78	1	Wanang	Malaise	P4915	11069	200	MAL-WAN01-D16
TS00277	Cicadellidae (larve)	Sp127	1	Wanang	Malaise	P4915	11069	200	MAL-WAN01-D16
TS00278	Delphacidae	Sp77	1	Wanang	Malaise	P0536	16820	200	MAL-WAN-D-05/16-d05
TS00279	Derbidae	Sp20	3	Wanang	Malaise	P0536	16820	200	MAL-WAN-D-05/16-d05
TS00280	Cicadellidae	Sp101	1	Wanang	Malaise	P0536	16820	200	MAL-WAN-D-05/16-d05
TS00281	Cicadellidae	Sp4	8	Wanang	Malaise	P0536	16820	200	MAL-WAN-D-05/16-d05
TS00282	Cicadellidae	Sp68	5	Wanang	Malaise	P0536	16820	200	MAL-WAN-D-05/16-d05
TS00283	Cicadellidae	Sp128	1	Wanang	Malaise	P0536	16820	200	MAL-WAN-D-05/16-d05
TS00284	Heteroptera	Sp97	4	Wanang	Malaise	P0536	16820	200	MAL-WAN-D-05/16-d05
TS00285	Cicadellidae	Sp29	7	Wanang	Malaise	P0536	16820	200	MAL-WAN-D-05/16-d05
TS00286	Cicadellidae	Sp129	1	Wanang	Malaise	P0536	16820	200	MAL-WAN-D-05/16-d05
TS00287	Cicadellidae	Sp110	4	Wanang	Malaise	P0536	16820	200	MAL-WAN-D-05/16-d05
TS00288	Cicadellidae	Sp102	10	Wanang	Malaise	P0536	16820	200	MAL-WAN-D-05/16-d05
TS00289	Cicadellidae	Sp11	1	Wanang	Malaise	P0536	16820	200	MAL-WAN-D-05/16-d05
TS00290	Heteroptera	Sp130	1	Wanang	Malaise	P0536	16820	200	MAL-WAN-D-05/16-d05
TS00291	Cicadellidae	Sp131	1	Wanang	Malaise	P0536	16820	200	MAL-WAN-D-05/16-d05
TS00292	Cicadellidae	Sp122	1	Wanang	Malaise	P0536	16820	200	MAL-WAN-D-05/16-d05
TS00293	Cicadellidae	Sp12	2	Wanang	Malaise	P0536	16820	200	MAL-WAN-D-05/16-d05
TS00294	Cicadellidae	Sp114	2	Wanang	Malaise	P0536	16820	200	MAL-WAN-D-05/16-d05
TS00295	Cicadellidae	Sp16	2	Wanang	Malaise	P0536	16820	200	MAL-WAN-D-05/16-d05
TS00296	Cicadellidae	Sp132	1	Wanang	Malaise	P0536	16820	200	MAL-WAN-D-05/16-d05
TS00297	Cicadellidae	Sp32	2	Wanang	Malaise	P0536	16820	200	MAL-WAN-D-05/16-d05
TS00298	Cicadellidae	Sp25	1	Wanang	Malaise	P0536	16820	200	MAL-WAN-D-05/16-d05
TS00299	Cicadellidae	Sp44	2	Wanang	Malaise	P0536	16820	200	MAL-WAN-D-05/16-d05
TS00300	Cicadellidae	Sp116	1	Wanang	Malaise	P0536	16820	200	MAL-WAN-D-05/16-d05
TS00301	Cicadellidae	Sp88	2	Wanang	Malaise	P0536	16820	200	MAL-WAN-D-05/16-d05
TS00302	Cicadellidae	Sp7	1	Wanang	Malaise	P0536	16820	200	MAL-WAN-D-05/16-d05
TS00303	Cicadellidae	Sp45	1	Wanang	Malaise	P0536	16820	200	MAL-WAN-D-05/16-d05
TS00304	Heteroptera	Sp133	1	Wanang	Malaise	P0536	16820	200	MAL-WAN-D-05/16-d05
TS00305	Cicadellidae	Sp134	1	Wanang	Malaise	P0536	16820	200	MAL-WAN-D-05/16-d05
TS00306	Heteroptera	Sp54	1	Wanang	Malaise	P0536	16820	200	MAL-WAN-D-05/16-d05
TS00307	Heteroptera	Sp135	1	Wanang	Malaise	P0536	16820	200	MAL-WAN-D-05/16-d05
TS00308	Fulgoromorpha (larve)	Sp136	1	Wanang	Malaise	P0536	16820	200	MAL-WAN-D-05/16-d05
TS00309	Cicadellidae	Sp137	2	Wanang	Malaise	P0536	16820	200	MAL-WAN-D-05/16-d05
TS00310	Cicadellidae	Sp138	1	Wanang	Malaise	P0536	16820	200	MAL-WAN-D-05/16-d05
TS00311	Cicadellidae	Sp72	2	Wanang	Malaise	P0536	16820	200	MAL-WAN-D-05/16-d05
TS00312	Cicadellidae	Sp110	5	Wanang	Malaise	P0535	14069	200	MAL-WAN-D-04/16-d04
TS00313	Cicadellidae	Sp102	12	Wanang	Malaise	P0535	14069	200	MAL-WAN-D-04/16-d04
TS00314	Cercopidae	Sp2	1	Wanang	Malaise	P0535	14069	200	MAL-WAN-D-04/16-d04
TS00315	Cicadellidae	Sp25	1	Wanang	Malaise	P0535	14069	200	MAL-WAN-D-04/16-d04
TS00316	Cicadellidae	Sp12	6	Wanang	Malaise	P0535	14069	200	MAL-WAN-D-04/16-d04
TS00317	Cicadellidae	Sp68	2	Wanang	Malaise	P0535	14069	200	MAL-WAN-D-04/16-d04
TS00318	Cicadellidae	Sp16	1	Wanang	Malaise	P0535	14069	200	MAL-WAN-D-04/16-d04
TS00319	Cicadellidae	Sp11	3	Wanang	Malaise	P0535	14069	200	MAL-WAN-D-04/16-d04
TS00320	Flatidae	Sp139	1	Wanang	Malaise	P0535	14069	200	MAL-WAN-D-04/16-d04
TS00321	Cixiidae	Sp55	1	Wanang	Malaise	P0535	14069	200	MAL-WAN-D-04/16-d04
TS00322	Derbidae	Sp140	1	Wanang	Malaise	P0535	14069	200	MAL-WAN-D-04/16-d04
TS00323	Cicadellidae	Sp4	11	Wanang	Malaise	P0535	14069	200	MAL-WAN-D-04/16-d04
TS00324	Cicadellidae	Sp29	8	Wanang	Malaise	P0535	14069	200	MAL-WAN-D-04/16-d04
TS00325	Cicadellidae	Sp41	3	Wanang	Malaise	P0535	14069	200	MAL-WAN-D-04/16-d04
TS00326	Cicadellidae	Sp45	3	Wanang	Malaise	P0535	14069	200	MAL-WAN-D-04/16-d04
TS00327	Derbidae	Sp141	1	Wanang	Malaise	P0535	14069	200	MAL-WAN-D-04/16-d04
TS00328	Heteroptera	Sp142	1	Wanang	Malaise	P0535	14069	200	MAL-WAN-D-04/16-d04
TS00329	Derbidae	Sp143	1	Wanang	Malaise	P0535	14069	200	MAL-WAN-D-04/16-d04
TS00330	Derbidae	Sp144	1	Wanang	Malaise	P0535	14069	200	MAL-WAN-D-04/16-d04
TS00331	Cicadellidae	Sp32	5	Wanang	Malaise	P0535	14069	200	MAL-WAN-D-04/16-d04
TS00332	Cicadellidae	Sp14	1	Wanang	Malaise	P0535	14069	200	MAL-WAN-D-04/16-d04
TS00333	Cicadellidae	Sp63	1	Wanang	Malaise	P0535	14069	200	MAL-WAN-D-04/16-d04
TS00334	Cicadellidae	Sp7	1	Wanang	Malaise	P0535	14069	200	MAL-WAN-D-04/16-d04
TS00335	Cicadellidae	Sp21	1	Wanang	Malaise	P0535	14069	200	MAL-WAN-D-04/16-d04
TS00336	Cicadellidae	Sp114	2	Wanang	Malaise	P0535	14069	200	MAL-WAN-D-04/16-d04
TS00337	Cicadellidae	Sp145	1	Wanang	Malaise	P0535	14069	200	MAL-WAN-D-04/16-d04
TS00338	Fulgoromorpha (larve)	Sp146	1	Wanang	Malaise	P0535	14069	200	MAL-WAN-D-04/16-d04
TS00339	Cicadellidae	Sp147	1	Wanang	Malaise	P0535	14069	200	MAL-WAN-D-04/16-d04
TS00340	Cicadellidae	Sp11	3	Wanang	Malaise	P4911	16776	200	MAL-WAN01-D12
TS00341	Cixiidae	Sp148	1	Wanang	Malaise	P4911	16776	200	MAL-WAN01-D12
TS00342	Cicadellidae	Sp32	3	Wanang	Malaise	P4911	16776	200	MAL-WAN01-D12
TS00343	Cicadellidae	Sp29	1	Wanang	Malaise	P4911	16776	200	MAL-WAN01-D12
TS00344	Cicadellidae	Sp63	1	Wanang	Malaise	P4911	16776	200	MAL-WAN01-D12
TS00345	Cicadellidae	Sp149	1	Wanang	Malaise	P4911	16776	200	MAL-WAN01-D12
TS00346	Cicadellidae	Sp102	4	Wanang	Malaise	P4911	16776	200	MAL-WAN01-D12
TS00347	Cicadellidae	Sp45	1	Wanang	Malaise	P4911	16776	200	MAL-WAN01-D12
TS00348	Cicadellidae	Sp25	1	Wanang	Malaise	P4911	16776	200	MAL-WAN01-D12
TS00349	Heteroptera	Sp150	1	Wanang	Malaise	P4911	16776	200	MAL-WAN01-D12
TS00350	Derbidae	Sp151	1	Wanang	Malaise	P4911	16776	200	MAL-WAN01-D12
TS00351	Heteroptera	Sp152	1	Wanang	Malaise	P4904	16841	200	MAL-WAN01-D05
TS00352	Derbidae	Sp20	1	Wanang	Malaise	P4904	16841	200	MAL-WAN01-D05
TS00353	Cicadellidae	Sp12	6	Wanang	Malaise	P4904	16841	200	MAL-WAN01-D05
TS00354	Cicadellidae	Sp14	1	Wanang	Malaise	P4904	16841	200	MAL-WAN01-D05
TS00355	Cicadellidae	Sp4	2	Wanang	Malaise	P4904	16841	200	MAL-WAN01-D05
TS00356	Cicadellidae	Sp29	1	Wanang	Malaise	P4904	16841	200	MAL-WAN01-D05
TS00357	Cicadellidae	Sp32	2	Wanang	Malaise	P4904	16841	200	MAL-WAN01-D05
TS00358	Cicadellidae	Sp153	1	Wanang	Malaise	P4904	16841	200	MAL-WAN01-D05
TS00359	Cicadellidae	Sp154	1	Wanang	Malaise	P4904	16841	200	MAL-WAN01-D05
TS00360	Heteroptera	Sp104	2	Wanang	Malaise	P4904	16841	200	MAL-WAN01-D05
TS00361	Heteroptera	Sp155	1	Wanang	Malaise	P4904	16841	200	MAL-WAN01-D05
TS00362	Heteroptera	Sp97	1	Wanang	Malaise	P4904	16841	200	MAL-WAN01-D05
TS00363	Cicadellidae	Sp156	1	Wanang	Malaise	P4904	16841	200	MAL-WAN01-D05
TS00364	Delphacidae	Sp77	1	Wanang	Malaise	P4904	16841	200	MAL-WAN01-D05
TS00365				Wanang	Malaise			200
TS00366				Wanang	Malaise			200
TS00367			852	Wanang	Malaise			200
TS00368			796	Wanang	Malaise			200
TS00369				Wanang	Malaise			200
TS00370				Wanang	Malaise			200
TS00371				Wanang	Malaise			200
TS00372				Wanang	Malaise			200
TS00373				Wanang	Malaise			200
TS00374				Wanang	Malaise			200
TS00375				Wanang	Malaise			200
TS00376				Wanang	Malaise			200
TS00377				Wanang	Malaise			200
TS00378				Wanang	Malaise			200
TS00379				Wanang	Malaise			200
TS00380				Wanang	Malaise			200
TS00381				Wanang	Malaise			200
TS00382				Wanang	Malaise			200
TS00383				Wanang	Malaise			200
TS00384				Wanang	Malaise			200
TS00385				Wanang	Malaise			200
TS00386				Wanang	Malaise			200
TS00387				Wanang	Malaise			200
TS00388				Wanang	Malaise			200
TS00389				Wanang	Malaise			200
TS00390				Wanang	Malaise			200
TS00391				Wanang	Malaise			200
TS00392				Wanang	Malaise			200
TS00393				Wanang	Malaise			200
TS00394				Wanang	Malaise			200
TS00395				Wanang	Malaise			200
TS00396				Wanang	Malaise			200
TS00397				Wanang	Malaise			200
TS00398				Wanang	Malaise			200
TS00399				Wanang	Malaise			200
TS00400				Wanang	Malaise			200
TS00401				Wanang	Malaise			200

## Sheet: Mt Wilhelm 3700m
					Key to the code	MAL: Malaise - MW: Mount Wilhelm, 3700: elevation (m), A: plot - xx/16: day xx/16 - dxx: day xx
MNHN Voucher	Taxa	Species	abundance	Site	Method	Short sample code	Val number	Altitude (m)	detailed sample code
TT00001	Cixiidae	Sp157	1	Mt Wilhelm	Malaise	P3732	14791	3700	MAL-MW3700A-05/16-d05
TT00002	Cixiidae	Sp157	1	Mt Wilhelm	Malaise	P3739	9102	3700	MAL-MW3700A-12/16-d12
TT00003	Cicadellidae	Sp158	1	Mt Wilhelm	Malaise	P3746	14782	3700	MAL-MW3700B-03/16-d03
TT00004	Cicadellidae (larve)	Sp159	1	Mt Wilhelm	Malaise	P3730	14798	3700	MAL-MW3700A-03/16-d03
TT00005	Cicadellidae	Sp160	1	Mt Wilhelm	Malaise	P3748	14805	3700	MAL-MW3700B-05/16-d05
TT00006	Cixiidae	Sp161	1	Mt Wilhelm	Malaise	P3738	14780	3700	MAL-MW3700A-11/16-d11
TT00007	Cixiidae	Sp161	1	Mt Wilhelm	Malaise	P3743	14803	3700	MAL-MW3700A-16/16-d16
TT00008	Cicadellidae	Sp162	1	Mt Wilhelm	Malaise	P3734	14884	3700	MAL-MW3700A-07/16-d07
TT00009	Cixiidae	Sp161	2	Mt Wilhelm	Malaise	P3737	14784	3700	MAL-MW3700A-10/16-d10
TT00010	Cicadellidae	Sp163	1	Mt Wilhelm	Malaise	P3737	14784	3700	MAL-MW3700A-10/16-d10
TT00011	Cixiidae	Sp164	1	Mt Wilhelm	Malaise	P3728	14802	3700	MAL-MW3700A-01/16-d01
TT00012	Cixiidae	Sp164	1	Mt Wilhelm	Malaise	P3741	9038	3700	MAL-MW3700A-14/16-d14
TT00013	Cicadellidae	Sp162	1	Mt Wilhelm	Malaise	P3733	14799	3700	MAL-MW3700A-06/16-d06
TT00014	Cicadellidae	Sp163	1	Mt Wilhelm	Malaise	P3751	14801	3700	MAL-MW3700B-08/16-d08
TT00015	Cicadellidae	Sp162	1	Mt Wilhelm	Malaise	P3762	14796	3700	MAL-MW3700C-03/16-d03
TT00016	Cixiidae	Sp164	3	Mt Wilhelm	Malaise	P3763	14781	3700	MAL-MW3700C-04/16-d04
TT00017	Cicadellidae (larve)	Sp165	1	Mt Wilhelm	Malaise	P3756	9085	3700	MAL-MW3700B-13/16-d13
TT00018	Cicadellidae	Sp163	1	Mt Wilhelm	Malaise	P3755	9044	3700	MAL-MW3700B-12/16-d12
TT00019	Cixiidae	Sp161	1	Mt Wilhelm	Malaise	P3753	14779	3700	MAL-MW3700B-10/16-d10
TT00020	Cicadellidae	Sp162	1	Mt Wilhelm	Malaise	P3753	14779	3700	MAL-MW3700B-10/16-d10
TT00021	Cicadellidae (larve)	Sp159	1	Mt Wilhelm	Malaise	P3750	14776	3700	MAL-MW3700B-07/16-d07
TT00022	Cixiidae	Sp166	1	Mt Wilhelm	Malaise	P3750	14776	3700	MAL-MW3700B-07/16-d07
TT00023	Membracidae	Sp167	1	Mt Wilhelm	Malaise	P3731	14795	3700	MAL-MW3700A-04/16-d04
TT00024	Cicadellidae	Sp168	1	Mt Wilhelm	Malaise	P3731	14795	3700	MAL-MW3700A-04/16-d04
TT00025	Cicadellidae (larve)	Sp169	1	Mt Wilhelm	Malaise	P3761	14800	3700	MAL-MW3700C-02/16-d02
TT00026	Cicadellidae	Sp162	1	Mt Wilhelm	Malaise	P3783	14785	3700	MAL-MW3700D-08/16-d08
TT00027	Cicadellidae	Sp170	1	Mt Wilhelm	Malaise	P3783	14785	3700	MAL-MW3700D-08/16-d08
TT00028	Psylloida	Sp171	1	Mt Wilhelm	Malaise	P3769	14797	3700	MAL-MW3700C-10/16-d10
TT00029	Cixiidae	Sp161	1	Mt Wilhelm	Malaise	P3769	14797	3700	MAL-MW3700C-10/16-d10
TT00030	Cicadellidae (larve)	Sp159	1	Mt Wilhelm	Malaise	P3769	14797	3700	MAL-MW3700C-10/16-d10
TT00031	Cicadellidae	Sp172	1	Mt Wilhelm	Malaise	P3775	14789	3700	MAL-MW3700C-16/16-d16
TT00032	Cicadellidae	Sp173	1	Mt Wilhelm	Malaise	P3775	14789	3700	MAL-MW3700C-16/16-d16
TT00033	Cicadellidae	Sp163	2	Mt Wilhelm	Malaise	P3779	14793	3700	MAL-MW3700D-04/16-d04
TT00034	Cicadellidae	Sp162	1	Mt Wilhelm	Malaise	P3758	9111	3700	MAL-MW3700B-15/16-d15
TT00035	Cicadellidae	Sp174	1	Mt Wilhelm	Malaise	P3758	9111	3700	MAL-MW3700B-15/16-d15
TT00036	Cicadellidae	Sp163	1	Mt Wilhelm	Malaise	P3757	9107	3700	MAL-MW3700B-14/16-d14
TT00037	Psylloida	Sp175	1	Mt Wilhelm	Malaise	P3757	9107	3700	MAL-MW3700B-14/16-d14
TT00038	Cixiidae	Sp161	1	Mt Wilhelm	Malaise	P3759	9119	3700	MAL-MW3700B-16/16-d16
TT00039	Cicadellidae	Sp163	1	Mt Wilhelm	Malaise	P3759	9119	3700	MAL-MW3700B-16/16-d16
TT00040	Psylloida	Sp175	1	Mt Wilhelm	Malaise	P3759	9119	3700	MAL-MW3700B-16/16-d16
TT00041	Cixiidae	Sp161	1	Mt Wilhelm	Malaise	P3785	14804	3700	MAL-MW3700D-10/16-d10
TT00042	Heteroptera (larve)	Sp176	1	Mt Wilhelm	Malaise	P3785	14804	3700	MAL-MW3700D-10/16-d10
TT00043	Cicadellidae	Sp162	1	Mt Wilhelm	Malaise	P3768	14790	3700	MAL-MW3700C-09/16-d09
TT00044	Cicadellidae	Sp162	1	Mt Wilhelm	Malaise	P3740	9015	3700	MAL-MW3700A-13/16-d13
TT00045	Cixiidae	Sp164	1	Mt Wilhelm	Malaise	P3740	9015	3700	MAL-MW3700A-13/16-d13
TT00046	Heteroptera	Sp177	1	Mt Wilhelm	Malaise	P3771	9124	3700	MAL-MW3700C-12/16-d12
TT00047	Cixiidae	Sp164	1	Mt Wilhelm	Malaise	P3773	9117	3700	MAL-MW3700C-14/16-d14
TT00048	Cicadellidae	Sp170	1	Mt Wilhelm	Malaise	P3780	14792	3700	MAL-MW3700D-05/16-d05
TT00049	Cixiidae	Sp164	1	Mt Wilhelm	Malaise	P3786	14777	3700	MAL-MW3700D-11/16-d11
TT00050	Cicadellidae	Sp170	1	Mt Wilhelm	Malaise	P3790	14794	3700	MAL-MW3700D-15/16-d15
	Total different species	21		Total Abundance	54
	Total cicadellidae species	12		Total cicadellidae	29
	Total cixiidae species	4		Total Fulgoromorpha	20
				Total major sp (sp162)	7
	Cixiidae	19		% total	0.12963
	Heteroptera	2		% cicadellidae	0.241379
	Psylloidea	3

## Sheet: Mt Wilhelm 3200m
					Key to the code	MAL: Malaise - MW: Mount Wilhelm, 3200: elevation (m), A: plot - xx/16: day xx/16 - dxx: day xx
MNHN Voucher	Taxa	Species	abundance	Site	Method	Short sample code	Val number	Altitude (m)	detailed sample code
TU00001	Cixiidae	Sp193	2	Mt Wilhelm	Malaise	P3347	14913	3200	MAL-MW3200A-10/16-d10
TU00002	Cicadellidae	Sp162	1	Mt Wilhelm	Malaise	P3347	14913	3200	MAL-MW3200A-10/16-d10
TU00003	Cicadellidae	Sp178	4	Mt Wilhelm	Malaise	P3347	14913	3200	MAL-MW3200A-10/16-d10
TU00004	Cicadellidae	Sp179	1	Mt Wilhelm	Malaise	P3347	14913	3200	MAL-MW3200A-10/16-d10
TU00005	Cixiidae	Sp166	1	Mt Wilhelm	Malaise	P3347	14913	3200	MAL-MW3200A-10/16-d10
TU00006	Cixiidae	Sp166	1	Mt Wilhelm	Malaise	P3348	14914	3200	MAL-MW3200A-11/16-d11
TU00007	Cicadellidae	Sp180	1	Mt Wilhelm	Malaise	P3348	14914	3200	MAL-MW3200A-11/16-d11
TU00008	Cicadellidae (larve)	Sp159	2	Mt Wilhelm	Malaise	P3348	14914	3200	MAL-MW3200A-11/16-d11
TU00009	Cicadellidae	Sp178	1	Mt Wilhelm	Malaise	P3348	14914	3200	MAL-MW3200A-11/16-d11
TU00010	Cicadellidae	Sp181	1	Mt Wilhelm	Malaise	P3348	14914	3200	MAL-MW3200A-11/16-d11
TU00011	Cicadellidae	Sp182	1	Mt Wilhelm	Malaise	P3339	14910	3200	MAL-MW3200A-02/16-d02
TU00012	Cicadellidae	Sp178	1	Mt Wilhelm	Malaise	P3339	14910	3200	MAL-MW3200A-02/16-d02
TU00013	Cicadellidae	Sp178	10	Mt Wilhelm	Malaise	P3342	14915	3200	MAL-MW3200A-05/16-d05
TU00014	Cicadellidae	Sp183	1	Mt Wilhelm	Malaise	P3342	14915	3200	MAL-MW3200A-05/16-d05
TU00015	Cicadellidae	Sp184	1	Mt Wilhelm	Malaise	P3342	14915	3200	MAL-MW3200A-05/16-d05
TU00016	Cicadellidae	Sp185	1	Mt Wilhelm	Malaise	P3342	14915	3200	MAL-MW3200A-05/16-d05
TU00017	Cicadellidae (larve)	Sp186	1	Mt Wilhelm	Malaise	P3342	14915	3200	MAL-MW3200A-05/16-d05
TU00018	Cicadellidae	Sp187	1	Mt Wilhelm	Malaise	P3355	14898	3200	MAL-MW3200B-02/16-d02
TU00019	Cicadellidae	Sp178	2	Mt Wilhelm	Malaise	P3349	14071	3200	MAL-MW3200A-12/16-d12
TU00020	Heteroptera	Sp188	1	Mt Wilhelm	Malaise	P3349	14071	3200	MAL-MW3200A-12/16-d12
TU00021	Cicadellidae (larve)	Sp181	1	Mt Wilhelm	Malaise	P3349	14071	3200	MAL-MW3200A-12/16-d12
TU00022	Cicadellidae	Sp178	2	Mt Wilhelm	Malaise	P3353	14878	3200	MAL-MW3200A-16/16-d16
TU00023	Heteroptera	Sp188	1	Mt Wilhelm	Malaise	P3350	14019	3200	MAL-MW3200A-13/16-d13
TU00024	Cicadellidae	Sp178	2	Mt Wilhelm	Malaise	P3351	14876	3200	MAL-MW3200A-14/16-d14
TU00025	Cicadellidae	Sp173	1	Mt Wilhelm	Malaise	P3351	14876	3200	MAL-MW3200A-14/16-d14
TU00026	Cicadellidae (larve)	Sp181	1	Mt Wilhelm	Malaise	P3351	14876	3200	MAL-MW3200A-14/16-d14
TU00027	Heteroptera	Sp189	1	Mt Wilhelm	Malaise	P3346	14007	3200	MAL-MW3200A-09/16-d09
TU00028	Cicadellidae	Sp178	7	Mt Wilhelm	Malaise	P3341	14907	3200	MAL-MW3200A-04/16-d04
TU00029	Cicadellidae	Sp187	1	Mt Wilhelm	Malaise	P3341	14907	3200	MAL-MW3200A-04/16-d04
TU00030	Cicadellidae	Sp178	3	Mt Wilhelm	Malaise	P3343	14894	3200	MAL-MW3200A-06/16-d06
TU00031	Cicadellidae	Sp190	1	Mt Wilhelm	Malaise	P3343	14894	3200	MAL-MW3200A-06/16-d06
TU00032	Cicadellidae (larve+male)	Sp181	2	Mt Wilhelm	Malaise	P3345	14042	3200	MAL-MW3200A-08/16-d08
TU00033	Cicadellidae	Sp178	7	Mt Wilhelm	Malaise	P3345	14042	3200	MAL-MW3200A-08/16-d08
TU00034	Cicadellidae	Sp191	1	Mt Wilhelm	Malaise	P3345	14042	3200	MAL-MW3200A-08/16-d08
TU00035	Cicadellidae (larve)	Sp186	1	Mt Wilhelm	Malaise	P3345	14042	3200	MAL-MW3200A-08/16-d08
TU00036	Fulgoromorpha (larve)	Sp192	1	Mt Wilhelm	Malaise	P3345	14042	3200	MAL-MW3200A-08/16-d08
TU00037	Cicadellidae	Sp178	1	Mt Wilhelm	Malaise	P3344	14002	3200	MAL-MW3200A-07/16-d07
TU00038	Cixiidae	Sp193	2	Mt Wilhelm	Malaise	P3344	14002	3200	MAL-MW3200A-07/16-d07
TU00039	Cicadellidae	Sp194	1	Mt Wilhelm	Malaise	P3344	14002	3200	MAL-MW3200A-07/16-d07
TU00040	Cicadellidae	Sp178	1	Mt Wilhelm	Malaise	P3338	14061	3200	MAL-MW3200A-01/16-d01
TU00041	Cicadellidae	Sp178	2	Mt Wilhelm	Malaise	P3340	14065	3200	MAL-MW3200A-03/16-d03
TU00042	Cicadellidae	Sp182	1	Mt Wilhelm	Malaise	P3340	14065	3200	MAL-MW3200A-03/16-d03
TU00043	Cicadellidae	Sp195	1	Mt Wilhelm	Malaise	P3340	14065	3200	MAL-MW3200A-03/16-d03
TU00044	Cicadellidae	Sp183	1	Mt Wilhelm	Malaise	P3361	14023	3200	MAL-MW3200B-08/16-d08
TU00045	Cicadellidae	Sp178	2	Mt Wilhelm	Malaise	P3362	14104	3200	MAL-MW3200B-09/16-d09
TU00046	Cicadellidae (larve)	Sp181	1	Mt Wilhelm	Malaise	P3362	14104	3200	MAL-MW3200B-09/16-d09
TU00047	Cicadellidae	Sp187	1	Mt Wilhelm	Malaise	P3365	14018	3200	MAL-MW3200B-12/16-d12
TU00048	Derbidae	Sp196	2	Mt Wilhelm	Malaise	P3366	14005	3200	MAL-MW3200B-13/16-d13
TU00049	Cercopidae	Sp197	1	Mt Wilhelm	Malaise	P3367	14879	3200	MAL-MW3200B-14/16-d14
TU00050	Derbidae	Sp198	1	Mt Wilhelm	Malaise	P3368	14908	3200	MAL-MW3200B-15/16-d15
TU00051	Cicadellidae	Sp199	1	Mt Wilhelm	Malaise	P3369	14896	3200	MAL-MW3200B-16/16-d16
TU00052	Cicadellidae	Sp178	1	Mt Wilhelm	Malaise	P3371	14892	3200	MAL-MW3200C-02/16-d02
TU00053	Cicadellidae	Sp187	1	Mt Wilhelm	Malaise	P3371	14892	3200	MAL-MW3200C-02/16-d02
TU00054	Cicadellidae	Sp200	1	Mt Wilhelm	Malaise	P3372	14114	3200	MAL-MW3200C-03/16-d03
TU00055	Derbidae	Sp201	1	Mt Wilhelm	Malaise	P3372	14114	3200	MAL-MW3200C-03/16-d03
TU00056	Cicadellidae	Sp178	3	Mt Wilhelm	Malaise	P3373	14912	3200	MAL-MW3200C-04/16-d04
TU00057	Cicadellidae	Sp187	1	Mt Wilhelm	Malaise	P3373	14912	3200	MAL-MW3200C-04/16-d04
TU00058	Cicadellidae	Sp178	5	Mt Wilhelm	Malaise	P3374	14909	3200	MAL-MW3200C-05/16-d05
TU00059	Cicadellidae	Sp202	1	Mt Wilhelm	Malaise	P3374	14909	3200	MAL-MW3200C-05/16-d05
TU00060	Cicadellidae	Sp199	1	Mt Wilhelm	Malaise	P3374	14909	3200	MAL-MW3200C-05/16-d05
TU00061	Delphacidae	Sp203	1	Mt Wilhelm	Malaise	P3375	14911	3200	MAL-MW3200C-06/16-d06
TU00062	Cicadellidae	Sp204	3	Mt Wilhelm	Malaise	P3375	14911	3200	MAL-MW3200C-06/16-d06
TU00063	Cicadellidae	Sp178	5	Mt Wilhelm	Malaise	P3375	14911	3200	MAL-MW3200C-06/16-d06
TU00064	Cixiidae	Sp205	1	Mt Wilhelm	Malaise	P3375	14911	3200	MAL-MW3200C-06/16-d06
TU00065	Cicadellidae	Sp178	3	Mt Wilhelm	Malaise	P3376	14924	3200	MAL-MW3200C-07/16-d07
TU00066	Cicadellidae	Sp178	5	Mt Wilhelm	Malaise	P3377	14089	3200	MAL-MW3200C-08/16-d08
TU00067	Cicadellidae	Sp199	1	Mt Wilhelm	Malaise	P3377	14089	3200	MAL-MW3200C-08/16-d08
TU00068	Cixiidae	Sp205	1	Mt Wilhelm	Malaise	P3377	14089	3200	MAL-MW3200C-08/16-d08
TU00069	Cicadellidae	Sp206	1	Mt Wilhelm	Malaise	P3377	14089	3200	MAL-MW3200C-08/16-d08
TU00070	Cicadellidae	Sp207	1	Mt Wilhelm	Malaise	P3377	14089	3200	MAL-MW3200C-08/16-d08
TU00071	Cicadellidae	Sp178	1	Mt Wilhelm	Malaise	P3378	14015	3200	MAL-MW3200C-09/16-d09
TU00072	Cicadellidae	Sp208	1	Mt Wilhelm	Malaise	P3378	14015	3200	MAL-MW3200C-09/16-d09
TU00073	Heteroptera	Sp209	1	Mt Wilhelm	Malaise	P3378	14015	3200	MAL-MW3200C-09/16-d09
TU00074	Heteroptera	Sp188	1	Mt Wilhelm	Malaise	P3378	14015	3200	MAL-MW3200C-09/16-d09
TU00075	Heteroptera	Sp210	1	Mt Wilhelm	Malaise	P3378	14015	3200	MAL-MW3200C-09/16-d09
TU00076	Cicadellidae	Sp178	4	Mt Wilhelm	Malaise	P3379	14881	3200	MAL-MW3200C-10/16-d10
TU00077	Cixiidae	Sp211	1	Mt Wilhelm	Malaise	P3379	14881	3200	MAL-MW3200C-10/16-d10
TU00078	Cicadellidae	Sp208	1	Mt Wilhelm	Malaise	P3380	14888	3200	MAL-MW3200C-11/16-d11
TU00079	Cicadellidae	Sp178	3	Mt Wilhelm	Malaise	P3380	14888	3200	MAL-MW3200C-11/16-d11
TU00080	Heteroptera	Sp188	1	Mt Wilhelm	Malaise	P3381	14110	3200	MAL-MW3200C-12/16-d12
TU00081	Cicadellidae	Sp158	1	Mt Wilhelm	Malaise	P3381	14110	3200	MAL-MW3200C-12/16-d12
TU00082	Cicadellidae	Sp178	1	Mt Wilhelm	Malaise	P3381	14110	3200	MAL-MW3200C-12/16-d12
TU00083	Cicadellidae	Sp212	1	Mt Wilhelm	Malaise	P3381	14110	3200	MAL-MW3200C-12/16-d12
TU00084	Cicadellidae	Sp178	3	Mt Wilhelm	Malaise	P3382	14080	3200	MAL-MW3200C-13/16-d13
TU00085	Cicadellidae	Sp213	1	Mt Wilhelm	Malaise	P3382	14080	3200	MAL-MW3200C-13/16-d13
TU00086	Derbidae	Sp196	1	Mt Wilhelm	Malaise	P3382	14080	3200	MAL-MW3200C-13/16-d13
TU00087	Cicadellidae	Sp178	1	Mt Wilhelm	Malaise	P3383	14902	3200	MAL-MW3200C-14/16-d14
TU00088	Cixiidae	Sp211	1	Mt Wilhelm	Malaise	P3383	14902	3200	MAL-MW3200C-14/16-d14
TU00089	Cixiidae	Sp205	1	Mt Wilhelm	Malaise	P3384	14077	3200	MAL-MW3200C-15/16-d15
TU00090	Cicadellidae	Sp178	5	Mt Wilhelm	Malaise	P3384	14077	3200	MAL-MW3200C-15/16-d15
TU00091	Cicadellidae	Sp178	1	Mt Wilhelm	Malaise	P3385	14877	3200	MAL-MW3200C-16/16-d16
TU00092	Cicadellidae	Sp178	1	Mt Wilhelm	Malaise	P3386	14032	3200	MAL-MW3200D-01/16-d01
TU00093	Derbidae	Sp214	1	Mt Wilhelm	Malaise	P3386	14032	3200	MAL-MW3200D-01/16-d01
TU00094	Cicadellidae	Sp178	4	Mt Wilhelm	Malaise	P3387	14895	3200	MAL-MW3200D-02/16-d02
TU00095	Cicadellidae	Sp208	1	Mt Wilhelm	Malaise	P3387	14895	3200	MAL-MW3200D-02/16-d02
TU00096	Cicadellidae	Sp215	1	Mt Wilhelm	Malaise	P3387	14895	3200	MAL-MW3200D-02/16-d02
TU00097	Cicadellidae	Sp178	2	Mt Wilhelm	Malaise	P3388	14101	3200	MAL-MW3200D-03/16-d03
TU00098	Cicadellidae	Sp216	1	Mt Wilhelm	Malaise	P3388	14101	3200	MAL-MW3200D-03/16-d03
TU00099	Cicadellidae	Sp178	8	Mt Wilhelm	Malaise	P3389	14900	3200	MAL-MW3200D-04/16-d04
TU00100	Cicadellidae	Sp180	1	Mt Wilhelm	Malaise	P3389	14900	3200	MAL-MW3200D-04/16-d04
TU00101	Heteroptera	Sp217	1	Mt Wilhelm	Malaise	P3389	14900	3200	MAL-MW3200D-04/16-d04
TU00102	Cicadellidae	Sp218	1	Mt Wilhelm	Malaise	P3389	14900	3200	MAL-MW3200D-04/16-d04
TU00103	Cicadellidae	Sp218	2	Mt Wilhelm	Malaise	P3390	14887	3200	MAL-MW3200D-05/16-d05
TU00104	Cicadellidae	Sp178	5	Mt Wilhelm	Malaise	P3390	14887	3200	MAL-MW3200D-05/16-d05
TU00105	Cixiidae	Sp219	1	Mt Wilhelm	Malaise	P3390	14887	3200	MAL-MW3200D-05/16-d05
TU00106	Cicadellidae	Sp178	6	Mt Wilhelm	Malaise	P3391	14890	3200	MAL-MW3200D-06/16-d06
TU00107	Cixiidae	Sp193	1	Mt Wilhelm	Malaise	P3391	14890	3200	MAL-MW3200D-06/16-d06
TU00108	Cixiidae	Sp220	1	Mt Wilhelm	Malaise	P3391	14890	3200	MAL-MW3200D-06/16-d06
TU00109	Heteroptera	Sp188	10	Mt Wilhelm	Malaise	P3393	14105	3200	MAL-MW3200D-08/16-d08
TU00110	Derbidae	Sp196	2	Mt Wilhelm	Malaise	P3393	14105	3200	MAL-MW3200D-08/16-d08
TU00111	Cicadellidae	Sp178	3	Mt Wilhelm	Malaise	P3393	14105	3200	MAL-MW3200D-08/16-d08
TU00112	Cicadellidae	Sp190	2	Mt Wilhelm	Malaise	P3393	14105	3200	MAL-MW3200D-08/16-d08
TU00113	Cixiidae	Sp205	1	Mt Wilhelm	Malaise	P3394	14035	3200	MAL-MW3200D-09/16-d09
TU00114	Cicadellidae	Sp178	4	Mt Wilhelm	Malaise	P3394	14035	3200	MAL-MW3200D-09/16-d09
TU00115	Heteroptera	Sp188	74	Mt Wilhelm	Malaise	P3394	14035	3200	MAL-MW3200D-09/16-d09
TU00116	Heteroptera	Sp210	1	Mt Wilhelm	Malaise	P3394	14035	3200	MAL-MW3200D-09/16-d09
TU00117	Cicadellidae	Sp178	3	Mt Wilhelm	Malaise	P3395	14903	3200	MAL-MW3200D-10/16-d10
TU00118	Heteroptera	Sp210	1	Mt Wilhelm	Malaise	P3395	14903	3200	MAL-MW3200D-10/16-d10
TU00119	Cicadellidae	Sp178	3	Mt Wilhelm	Malaise	P3396	14905	3200	MAL-MW3200D-11/16-d11
TU00120	Heteroptera	Sp221	1	Mt Wilhelm	Malaise	P3397	14010	3200	MAL-MW3200D-12/16-d12
TU00121	Psylloidea	Sp222	1	Mt Wilhelm	Malaise	P3397	14010	3200	MAL-MW3200D-12/16-d12
TU00122	Derbidae	Sp201	1	Mt Wilhelm	Malaise	P3398	14122	3200	MAL-MW3200D-13/16-d13
TU00123	Cicadellidae	Sp178	4	Mt Wilhelm	Malaise	P3398	14122	3200	MAL-MW3200D-13/16-d13
TU00124	Cicadellidae	Sp178	5	Mt Wilhelm	Malaise	P3399	14030	3200	MAL-MW3200D-14/16-d14
TU00125	Heteroptera	Sp210	1	Mt Wilhelm	Malaise	P3399	14030	3200	MAL-MW3200D-14/16-d14
TU00126	Cicadellidae	Sp178	2	Mt Wilhelm	Malaise	P3400	14111	3200	MAL-MW3200D-15/16-d15
TU00127	Derbidae	Sp223	1	Mt Wilhelm	Malaise	P3400	14111	3200	MAL-MW3200D-15/16-d15
TU00128	Cixiidae	Sp224	1	Mt Wilhelm	Malaise	P3400	14111	3200	MAL-MW3200D-15/16-d15
TU00129	Cixiidae	Sp193	1	Mt Wilhelm	Malaise	P3401	14880	3200	MAL-MW3200D-16/16-d16
TU00130	Cicadellidae	Sp178	4	Mt Wilhelm	Malaise	P3401	14880	3200	MAL-MW3200D-16/16-d16
	Total different species	50		Total Abundance	320
	Total cicadellidae species	29		Total cicadellidae	184
	Total cixiidae species	7		Total Fulgoromorpha	29
	Total derbidae species	5
	Total delphacidae species	1		Total major sp (sp178)	136
	Total cercopidae species	1		% total	0.425
				% cicadellidae	0.73913
	Cixiidae	17
	Heteroptera	93
	Psylloidea	1
	Derbidae	10
	Delphacidae	1
	Fulgoromorpha	1

## Sheet: Mt Wilhelm 2700m
					Key to the code	MAL: Malaise - MW: Mount Wilhelm, 2700: elevation (m), A: plot - xx/16: day xx/16 - dxx: day xx
MNHN Voucher	Taxa	Species	abundance	Site	Method	Short sample code	Val number	Altitude (m)	detailed sample code
TV00001	Derbidae	Sp225	1	Mt Wilhelm	Malaise	P2948	9704	2700	MAL-MW2700A-01/16-d01
TV00002	Cicadellidae	Sp180	1	Mt Wilhelm	Malaise	P2949	6357	2700	MAL-MW2700A-02/16-d02
TV00003	Cicadellidae	Sp180	2	Mt Wilhelm	Malaise	P2950	6253	2700	MAL-MW2700A-03/16-d03
TV00004	Cicadellidae	Sp226	1	Mt Wilhelm	Malaise	P2950	6253	2700	MAL-MW2700A-03/16-d03
TV00005	Cicadellidae	Sp180	3	Mt Wilhelm	Malaise	P2951	6367	2700	MAL-MW2700A-04/16-d04
TV00006	Derbidae	Sp227	1	Mt Wilhelm	Malaise	P2951	6367	2700	MAL-MW2700A-04/16-d04
TV00007	Cicadellidae	Sp180	1	Mt Wilhelm	Malaise	P2952	6288	2700	MAL-MW2700A-05/16-d05
TV00008	Derbidae	Sp228	2	Mt Wilhelm	Malaise	P2953	14067	2700	MAL-MW2700A-06/16-d06
TV00009	Cicadellidae	Sp180	2	Mt Wilhelm	Malaise	P2953	14067	2700	MAL-MW2700A-06/16-d06
TV00010	Heteroptera	Sp188	1	Mt Wilhelm	Malaise	P2953	14067	2700	MAL-MW2700A-06/16-d06
TV00011	Derbidae	Sp229	1	Mt Wilhelm	Malaise	P2953	14067	2700	MAL-MW2700A-06/16-d06
TV00012	Cicadellidae (larve)	Sp230	1	Mt Wilhelm	Malaise	P2953	14067	2700	MAL-MW2700A-06/16-d06
TV00013	Derbidae	Sp231	1	Mt Wilhelm	Malaise	P2953	14067	2700	MAL-MW2700A-06/16-d06
TV00014	Fulgoromorpha (larve)	Sp232	1	Mt Wilhelm	Malaise	P2955	14120	2700	MAL-MW2700A-08/16-d08
TV00015	Cicadellidae	Sp180	1	Mt Wilhelm	Malaise	P2956	14074	2700	MAL-MW2700A-09/16-d09
TV00016	Derbidae	Sp225	1	Mt Wilhelm	Malaise	P2957	6343	2700	MAL-MW2700A-10/16-d10
TV00017	Derbidae	Sp229	2	Mt Wilhelm	Malaise	P2959	14091	2700	MAL-MW2700A-12/16-d12
TV00018	Cicadellidae	Sp180	1	Mt Wilhelm	Malaise	P2959	14091	2700	MAL-MW2700A-12/16-d12
TV00019	Derbidae	Sp228	1	Mt Wilhelm	Malaise	P2959	14091	2700	MAL-MW2700A-12/16-d12
TV00020	Derbidae	Sp231	1	Mt Wilhelm	Malaise	P2959	14091	2700	MAL-MW2700A-12/16-d12
TV00021	Derbidae	Sp196	1	Mt Wilhelm	Malaise	P2959	14091	2700	MAL-MW2700A-12/16-d12
TV00022	Cixiidae	Sp193	1	Mt Wilhelm	Malaise	P2959	14091	2700	MAL-MW2700A-12/16-d12
TV00023	Cicadellidae	Sp180	3	Mt Wilhelm	Malaise	P2960	14017	2700	MAL-MW2700A-13/16-d13
TV00024	Derbidae	Sp196	2	Mt Wilhelm	Malaise	P2960	14017	2700	MAL-MW2700A-13/16-d13
TV00025	Derbidae	Sp227	1	Mt Wilhelm	Malaise	P2963	6354	2700	MAL-MW2700A-16/16-d16
TV00026	Heteroptera	Sp188	1	Mt Wilhelm	Malaise	P2965	6307	2700	MAL-MW2700B-02/16-d02
TV00027	Derbidae	Sp228	1	Mt Wilhelm	Malaise	P2965	6307	2700	MAL-MW2700B-02/16-d02
TV00028	Cicadellidae	Sp180	1	Mt Wilhelm	Malaise	P2966	16046	2700	MAL-MW2700B-03/16-d03
TV00029	Psylloidea	Sp233	1	Mt Wilhelm	Malaise	P2966	16046	2700	MAL-MW2700B-03/16-d03
TV00030	Achilidae	Sp234	1	Mt Wilhelm	Malaise	P2966	16046	2700	MAL-MW2700B-03/16-d03
TV00031	Cicadellidae	Sp180	1	Mt Wilhelm	Malaise	P2967	6268	2700	MAL-MW2700B-04/16-d04
TV00032	Derbidae	Sp196	1	Mt Wilhelm	Malaise	P2968	6313	2700	MAL-MW2700B-05/16-d05
TV00033	Achilidae (Rhotara sp)	Sp235	1	Mt Wilhelm	Malaise	P2968	6313	2700	MAL-MW2700B-05/16-d05
TV00034	Derbidae	Sp228	1	Mt Wilhelm	Malaise	P2971	6348	2700	MAL-MW2700B-08/16-d08
TV00035	Derbidae	Sp227	2	Mt Wilhelm	Malaise	P2971	6348	2700	MAL-MW2700B-08/16-d08
TV00036	Derbidae	Sp196	1	Mt Wilhelm	Malaise	P2971	6348	2700	MAL-MW2700B-08/16-d08
TV00037	Cicadellidae	Sp180	1	Mt Wilhelm	Malaise	P2972	14031	2700	MAL-MW2700B-09/16-d09
TV00038	Cicadellidae (larve)	Sp236	1	Mt Wilhelm	Malaise	P2972	14031	2700	MAL-MW2700B-09/16-d09
TV00039	Delphacidae	Sp237	1	Mt Wilhelm	Malaise	P2973	14125	2700	MAL-MW2700B-10/16-d10
TV00040	Cicadellidae	Sp180	1	Mt Wilhelm	Malaise	P2973	14125	2700	MAL-MW2700B-10/16-d10
TV00041	Derbidae	Sp196	1	Mt Wilhelm	Malaise	P2973	14125	2700	MAL-MW2700B-10/16-d10
TV00042	Psylloidea	Sp238	1	Mt Wilhelm	Malaise	P2973	14125	2700	MAL-MW2700B-10/16-d10
TV00043	Delphacidae (larve)	Sp239	1	Mt Wilhelm	Malaise	P2973	14125	2700	MAL-MW2700B-10/16-d10
TV00044	Margarodidae	Sp240	1	Mt Wilhelm	Malaise	P2973	14125	2700	MAL-MW2700B-10/16-d10
TV00045	Derbidae	Sp20	1	Mt Wilhelm	Malaise	P2974	14020	2700	MAL-MW2700B-11/16-d11
TV00046	Derbidae	Sp196	1	Mt Wilhelm	Malaise	P2974	14020	2700	MAL-MW2700B-11/16-d11
TV00047	Derbidae	Sp241	1	Mt Wilhelm	Malaise	P2974	14020	2700	MAL-MW2700B-11/16-d11
TV00048	Cicadellidae	Sp180	1	Mt Wilhelm	Malaise	P2976	14057	2700	MAL-MW2700B-13/16-d13
TV00049	Cicadellidae	Sp204	1	Mt Wilhelm	Malaise	P2976	14057	2700	MAL-MW2700B-13/16-d13
TV00050	Delphacidae (larve)	Sp239	1	Mt Wilhelm	Malaise	P2981	6369	2700	MAL-MW2700C-02/16-d02
TV00051	Cicadellidae	Sp180	1	Mt Wilhelm	Malaise	P2982	6280	2700	MAL-MW2700C-03/16-d03
TV00052	Derbidae	Sp225	1	Mt Wilhelm	Malaise	P2982	6280	2700	MAL-MW2700C-03/16-d03
TV00053	Cicadellidae	Sp242	1	Mt Wilhelm	Malaise	P2982	6280	2700	MAL-MW2700C-03/16-d03
TV00054	Psocoptera	Sp243	1	Mt Wilhelm	Malaise	P2983	6351	2700	MAL-MW2700C-04/16-d04
TV00055	Delphacidae	Sp203	1	Mt Wilhelm	Malaise	P2984	6346	2700	MAL-MW2700C-05/16-d05
TV00056	Delphacidae (larve)	Sp239	1	Mt Wilhelm	Malaise	P2988	14011	2700	MAL-MW2700C-09/16-d09
TV00057	Cicadellidae (larve)	Sp244	1	Mt Wilhelm	Malaise	P2988	14011	2700	MAL-MW2700C-09/16-d09
TV00058	Cicadellidae (larve)	Sp245	1	Mt Wilhelm	Malaise	P2988	14011	2700	MAL-MW2700C-09/16-d09
TV00059	Cicadellidae	Sp178	1	Mt Wilhelm	Malaise	P2990	14094	2700	MAL-MW2700C-11/16-d11
TV00060	Cicadellidae	Sp178	1	Mt Wilhelm	Malaise	P2995	14100	2700	MAL-MW2700C-16/16-d16
TV00061	Cicadellidae	Sp180	1	Mt Wilhelm	Malaise	P2996	9723	2700	MAL-MW2700D-01/16-d01
TV00062	Cicadellidae	Sp180	1	Mt Wilhelm	Malaise	P2997	6339	2700	MAL-MW2700D-02/16-d02
TV00063	Cicadellidae	Sp180	2	Mt Wilhelm	Malaise	P2998	14092	2700	MAL-MW2700D-03/16-d03
TV00064	Cicadellidae	Sp178	7	Mt Wilhelm	Malaise	P2998	14092	2700	MAL-MW2700D-03/16-d03
TV00065	Cixiidae	Sp246	1	Mt Wilhelm	Malaise	P2998	14092	2700	MAL-MW2700D-03/16-d03
TV00066	Cicadellidae	Sp247	1	Mt Wilhelm	Malaise	P2998	14092	2700	MAL-MW2700D-03/16-d03
TV00067	Cicadellidae	Sp178	3	Mt Wilhelm	Malaise	P2999	6306	2700	MAL-MW2700D-04/16-d04
TV00068	Cicadellidae	Sp178	2	Mt Wilhelm	Malaise	P3000	6317	2700	MAL-MW2700D-05/16-d05
TV00069	Heteroptera	Sp188	1	Mt Wilhelm	Malaise	P3000	6317	2700	MAL-MW2700D-05/16-d05
TV00070	Cixiidae	Sp248	1	Mt Wilhelm	Malaise	P3000	6317	2700	MAL-MW2700D-05/16-d05
TV00071	Psylloidea	Sp249	1	Mt Wilhelm	Malaise	P3000	6317	2700	MAL-MW2700D-05/16-d05
TV00072	Cicadellidae	Sp178	2	Mt Wilhelm	Malaise	P3001	6372	2700	MAL-MW2700D-06/16-d06
TV00073	Cixiidae	Sp250	1	Mt Wilhelm	Malaise	P3001	6372	2700	MAL-MW2700D-06/16-d06
TV00074	Cicadellidae	Sp178	2	Mt Wilhelm	Malaise	P3002	6364	2700	MAL-MW2700D-07/16-d07
TV00075	Cicadellidae	Sp180	2	Mt Wilhelm	Malaise	P3003	14096	2700	MAL-MW2700D-08/16-d08
TV00076	Cicadellidae	Sp178	3	Mt Wilhelm	Malaise	P3003	14096	2700	MAL-MW2700D-08/16-d08
TV00077	Cicadellidae	Sp251	1	Mt Wilhelm	Malaise	P3003	14096	2700	MAL-MW2700D-08/16-d08
TV00078	Cixiidae	Sp250	1	Mt Wilhelm	Malaise	P3003	14096	2700	MAL-MW2700D-08/16-d08
TV00079	Cicadellidae	Sp178	3	Mt Wilhelm	Malaise	P3004	14115	2700	MAL-MW2700D-09/16-d09
TV00080	Heteroptera	Sp252	1	Mt Wilhelm	Malaise	P3004	14115	2700	MAL-MW2700D-09/16-d09
TV00081	Cicadellidae	Sp180	1	Mt Wilhelm	Malaise	P3005	14095	2700	MAL-MW2700D-10/16-d10
TV00082	Cicadellidae	Sp178	1	Mt Wilhelm	Malaise	P3005	14095	2700	MAL-MW2700D-10/16-d10
TV00083	Cicadellidae	Sp253	1	Mt Wilhelm	Malaise	P3005	14095	2700	MAL-MW2700D-10/16-d10
TV00084	Cicadellidae	Sp180	1	Mt Wilhelm	Malaise	P3006	14029	2700	MAL-MW2700D-11/16-d11
TV00085	Derbidae	Sp228	2	Mt Wilhelm	Malaise	P3006	14029	2700	MAL-MW2700D-11/16-d11
TV00086	Cixiidae	Sp193	2	Mt Wilhelm	Malaise	P3006	14029	2700	MAL-MW2700D-11/16-d11
TV00087	Cixiidae	Sp254	1	Mt Wilhelm	Malaise	P3006	14029	2700	MAL-MW2700D-11/16-d11
TV00088	Cicadellidae	Sp178	1	Mt Wilhelm	Malaise	P3007	14009	2700	MAL-MW2700D-12/16-d12
TV00089	Cicadellidae	Sp178	1	Mt Wilhelm	Malaise	P3008	6265	2700	MAL-MW2700D-13/16-d13
TV00090	Cercopidae	Sp197	1	Mt Wilhelm	Malaise	P3009	14075	2700	MAL-MW2700D-14/16-d14
TV00091	Cicadellidae	Sp178	2	Mt Wilhelm	Malaise	P3011	14026	2700	MAL-MW2700D-16/16-d16
TV00092	Cicadellidae	Sp180	1	Mt Wilhelm	Malaise	P3011	14026	2700	MAL-MW2700D-16/16-d16
TV00093	Cicadellidae	Sp255	1	Mt Wilhelm	Malaise	P3011	14026	2700	MAL-MW2700D-16/16-d16
	Total different species	40		Total Abundance	123
	Total cicadellidae species	12		Total cicadellidae	69
	Total achilidae species	2		Total Fulgoromorpha	43
	Total cixiidae species	5
	Total derbidae species	8		Total major sp (sp180)	29
	Total delphacidae species	3		% total	0.235772
	Total cercopidae species	1		% cicadellidae	0.42029
	Cixiidae	8
	Heteroptera	4
	Psylloidea	3
	Derbidae	28
	Delphacidae	4
	Fulgoromorpha	1
	Achilidae	2
	Cercopidae	1

## Sheet: Mt Wilhelm 2200m
					Key to the code	MAL: Malaise - MW: Mount Wilhelm, 2200: elevation (m), A: plot - xx/16: day xx/16 - dxx: day xx
MNHN Voucher	Taxa	Species	abundance	Site	Method	Short sample code	Val number	Altitude (m)	detailed sample code
TW00001	Cicadellidae	Sp256	1	Mt Wilhelm	Malaise	P2559	11591	2200	MAL-MW2200A-02/16-d02
TW00002	Cicadellidae	Sp257	1	Mt Wilhelm	Malaise	P2559	11591	2200	MAL-MW2200A-02/16-d02
TW00003	Heteroptera	Sp258	1	Mt Wilhelm	Malaise	P2559	11591	2200	MAL-MW2200A-02/16-d02
TW00004	Cicadellidae	Sp259	2	Mt Wilhelm	Malaise	P2560	11794	2200	MAL-MW2200A-03/16-d03
TW00005	Cicadellidae	Sp260	1	Mt Wilhelm	Malaise	P2560	11794	2200	MAL-MW2200A-03/16-d03
TW00006	Achilidae	Sp261	1	Mt Wilhelm	Malaise	P2560	11794	2200	MAL-MW2200A-03/16-d03
TW00007	Cicadellidae	Sp259	1	Mt Wilhelm	Malaise	P2561	11610	2200	MAL-MW2200A-04/16-d04
TW00008	Achilidae	Sp261	1	Mt Wilhelm	Malaise	P2561	11610	2200	MAL-MW2200A-04/16-d04
TW00009	Derbidae	Sp262	1	Mt Wilhelm	Malaise	P2561	11610	2200	MAL-MW2200A-04/16-d04
TW00010	Achilidae (Rhotala sp)	Sp263	1	Mt Wilhelm	Malaise	P2561	11610	2200	MAL-MW2200A-04/16-d04
TW00011	Achilidae	Sp261	1	Mt Wilhelm	Malaise	P2562	11784	2200	MAL-MW2200A-05/16-d05
TW00012	Cicadellidae	Sp264	1	Mt Wilhelm	Malaise	P2562	11784	2200	MAL-MW2200A-05/16-d05
TW00013	Cicadellidae	Sp265	1	Mt Wilhelm	Malaise	P2562	11784	2200	MAL-MW2200A-05/16-d05
TW00014	Cicadellidae	Sp266	1	Mt Wilhelm	Malaise	P2562	11784	2200	MAL-MW2200A-05/16-d05
TW00015	Cicadellidae	Sp267	1	Mt Wilhelm	Malaise	P2562	11784	2200	MAL-MW2200A-05/16-d05
TW00016	Cicadellidae	Sp260	3	Mt Wilhelm	Malaise	P2563	11581	2200	MAL-MW2200A-06/16-d06
TW00017	Cicadellidae	Sp259	2	Mt Wilhelm	Malaise	P2563	11581	2200	MAL-MW2200A-06/16-d06
TW00018	Cicadellidae	Sp268	1	Mt Wilhelm	Malaise	P2563	11581	2200	MAL-MW2200A-06/16-d06
TW00019	Cicadellidae	Sp269	1	Mt Wilhelm	Malaise	P2563	11581	2200	MAL-MW2200A-06/16-d06
TW00020	Cicadellidae	Sp259	3	Mt Wilhelm	Malaise	P2565	11780	2200	MAL-MW2200A-08/16-d08
TW00021	Cicadellidae	Sp270	1	Mt Wilhelm	Malaise	P2565	11780	2200	MAL-MW2200A-08/16-d08
TW00022	Cicadellidae	Sp269	1	Mt Wilhelm	Malaise	P2566	11603	2200	MAL-MW2200A-09/16-d09
TW00023	Cicadellidae	Sp260	1	Mt Wilhelm	Malaise	P2566	11603	2200	MAL-MW2200A-09/16-d09
TW00024	Cicadellidae	Sp271	1	Mt Wilhelm	Malaise	P2566	11603	2200	MAL-MW2200A-09/16-d09
TW00025	Cicadellidae	Sp272	1	Mt Wilhelm	Malaise	P2566	11603	2200	MAL-MW2200A-09/16-d09
TW00026	Cicadellidae	Sp273	2	Mt Wilhelm	Malaise	P2566	11603	2200	MAL-MW2200A-09/16-d09
TW00027	Cicadellidae	Sp259	2	Mt Wilhelm	Malaise	P2567	11625	2200	MAL-MW2200A-10/16-d10
TW00028	Cicadellidae	Sp274	2	Mt Wilhelm	Malaise	P2567	11625	2200	MAL-MW2200A-10/16-d10
TW00029	Cicadellidae	Sp260	1	Mt Wilhelm	Malaise	P2567	11625	2200	MAL-MW2200A-10/16-d10
TW00030	Cicadellidae	Sp275	1	Mt Wilhelm	Malaise	P2567	11625	2200	MAL-MW2200A-10/16-d10
TW00031	Heteroptera	Sp188	1	Mt Wilhelm	Malaise	P2567	11625	2200	MAL-MW2200A-10/16-d10
TW00032	Achilidae	Sp261	2	Mt Wilhelm	Malaise	P2568	11621	2200	MAL-MW2200A-11/16-d11
TW00033	Cicadellidae	Sp267	1	Mt Wilhelm	Malaise	P2568	11621	2200	MAL-MW2200A-11/16-d11
TW00034	Heteroptera	Sp188	2	Mt Wilhelm	Malaise	P2569	11874	2200	MAL-MW2200A-12/16-d12
TW00035	Cicadellidae	Sp260	1	Mt Wilhelm	Malaise	P2569	11874	2200	MAL-MW2200A-12/16-d12
TW00036	Cicadellidae	Sp269	1	Mt Wilhelm	Malaise	P2569	11874	2200	MAL-MW2200A-12/16-d12
TW00037	Cicadellidae	Sp275	1	Mt Wilhelm	Malaise	P2569	11874	2200	MAL-MW2200A-12/16-d12
TW00038	Cicadellidae	Sp276	1	Mt Wilhelm	Malaise	P2569	11874	2200	MAL-MW2200A-12/16-d12
TW00039	Heteroptera	Sp277	1	Mt Wilhelm	Malaise	P2569	11874	2200	MAL-MW2200A-12/16-d12
TW00040	Cicadellidae	Sp278	1	Mt Wilhelm	Malaise	P2569	11874	2200	MAL-MW2200A-12/16-d12
TW00041	Cercopidae	Sp279	1	Mt Wilhelm	Malaise	P2569	11874	2200	MAL-MW2200A-12/16-d12
TW00042	Cicadellidae	Sp269	2	Mt Wilhelm	Malaise	P2570	2145	2200	MAL-MW2200A-13/16-d13
TW00043	Cicadellidae	Sp270	1	Mt Wilhelm	Malaise	P2570	2145	2200	MAL-MW2200A-13/16-d13
TW00044	Cicadellidae	Sp280	1	Mt Wilhelm	Malaise	P2570	2145	2200	MAL-MW2200A-13/16-d13
TW00045	Cicadellidae	Sp259	1	Mt Wilhelm	Malaise	P2570	2145	2200	MAL-MW2200A-13/16-d13
TW00046	Cicadellidae	Sp281	1	Mt Wilhelm	Malaise	P2570	2145	2200	MAL-MW2200A-13/16-d13
TW00047	Cicadellidae	Sp282	1	Mt Wilhelm	Malaise	P2570	2145	2200	MAL-MW2200A-13/16-d13
TW00048	Fulgoromorpha (larve)	Sp283	1	Mt Wilhelm	Malaise	P2570	2145	2200	MAL-MW2200A-13/16-d13
TW00049	Cicadellidae	Sp259	1	Mt Wilhelm	Malaise	P2571	2144	2200	MAL-MW2200A-14/16-d14
TW00050	Derbidae	Sp228	1	Mt Wilhelm	Malaise	P2571	2144	2200	MAL-MW2200A-14/16-d14
TW00051	Heteroptera	Sp188	1	Mt Wilhelm	Malaise	P2571	2144	2200	MAL-MW2200A-14/16-d14
TW00052	Heteroptera	Sp284	1	Mt Wilhelm	Malaise	P2571	2144	2200	MAL-MW2200A-14/16-d14
TW00053	Cicadellidae	Sp269	2	Mt Wilhelm	Malaise	P2572	11598	2200	MAL-MW2200A-15/16-d15
TW00054	Cicadellidae	Sp281	1	Mt Wilhelm	Malaise	P2572	11598	2200	MAL-MW2200A-15/16-d15
TW00055	Heteroptera	Sp284	1	Mt Wilhelm	Malaise	P2572	11598	2200	MAL-MW2200A-15/16-d15
TW00056	Cicadellidae	Sp285	1	Mt Wilhelm	Malaise	P2572	11598	2200	MAL-MW2200A-15/16-d15
TW00057	Achilidae	Sp286	1	Mt Wilhelm	Malaise	P2572	11598	2200	MAL-MW2200A-15/16-d15
TW00058	Aleyrodidae	Sp287	1	Mt Wilhelm	Malaise	P2572	11598	2200	MAL-MW2200A-15/16-d15
TW00059	Cicadellidae	Sp288	1	Mt Wilhelm	Malaise	P2573	11582	2200	MAL-MW2200A-16/16-d16
TW00060	Cicadellidae	Sp289	1	Mt Wilhelm	Malaise	P2573	11582	2200	MAL-MW2200A-16/16-d16
TW00061	Delphacidae (larve)	Sp290	1	Mt Wilhelm	Malaise	P2574	11599	2200	MAL-MW2200B-01/16-d01
TW00062	Cicadellidae (larve)	Sp291	1	Mt Wilhelm	Malaise	P2576	11789	2200	MAL-MW2200B-03/16-d03
TW00063	Cicadellidae	Sp292	1	Mt Wilhelm	Malaise	P2579	11583	2200	MAL-MW2200B-06/16-d06
TW00064	Heteroptera	Sp293	1	Mt Wilhelm	Malaise	P2582	11601	2200	MAL-MW2200B-09/16-d09
TW00065	Achilidae	Sp294	1	Mt Wilhelm	Malaise	P2582	11601	2200	MAL-MW2200B-09/16-d09
TW00066	Cicadellidae	Sp204	1	Mt Wilhelm	Malaise	P2583	11620	2200	MAL-MW2200B-10/16-d10
TW00067	Meenoplidae	Sp295	1	Mt Wilhelm	Malaise	P2583	11620	2200	MAL-MW2200B-10/16-d10
TW00068	Achilidae	Sp261	2	Mt Wilhelm	Malaise	P2584	11616	2200	MAL-MW2200B-11/16-d11
TW00069	Fulgoromorpha (larve)	Sp239	1	Mt Wilhelm	Malaise	P2584	11616	2200	MAL-MW2200B-11/16-d11
TW00070	Derbidae	Sp296	1	Mt Wilhelm	Malaise	P2584	11616	2200	MAL-MW2200B-11/16-d11
TW00071	Cercopidae	Sp297	1	Mt Wilhelm	Malaise	P2584	11616	2200	MAL-MW2200B-11/16-d11
TW00072	Heteroptera	Sp298	1	Mt Wilhelm	Malaise	P2586	2140	2200	MAL-MW2200B-13/16-d13
TW00073	Cicadellidae	Sp278	1	Mt Wilhelm	Malaise	P2586	2140	2200	MAL-MW2200B-13/16-d13
TW00074	Cicadellidae	Sp259	1	Mt Wilhelm	Malaise	P2587	2139	2200	MAL-MW2200B-14/16-d14
TW00075	Cicadellidae	Sp299	1	Mt Wilhelm	Malaise	P2588	11606	2200	MAL-MW2200B-15/16-d15
TW00076	Achilidae (Rhotala sp)	Sp300	1	Mt Wilhelm	Malaise	P2589	11615	2200	MAL-MW2200B-16/16-d16
TW00077	Cicadellidae	Sp204	1	Mt Wilhelm	Malaise	P2589	11615	2200	MAL-MW2200B-16/16-d16
TW00078	Cicadellidae	Sp269	1	Mt Wilhelm	Malaise	P2594	11612	2200	MAL-MW2200C-05/15-d05
TW00079	Aleyrodidae	Sp301	1	Mt Wilhelm	Malaise	P2595	11596	2200	MAL-MW2200C-06/15-d06
TW00080	Cicadellidae (larve)	Sp302	1	Mt Wilhelm	Malaise	P2599	11617	2200	MAL-MW2200C-10/16-d10
TW00081	Cicadellidae	Sp256	1	Mt Wilhelm	Malaise	P2599	11627	2200	MAL-MW2200C-10/16-d10
TW00082	Derbidae	Sp228	1	Mt Wilhelm	Malaise	P2600	11618	2200	MAL-MW2200C-11/16-d11
TW00083	Cixiidae	Sp303	1	Mt Wilhelm	Malaise	P2600	11618	2200	MAL-MW2200C-11/16-d11
TW00084	Cercopidae	Sp279	1	Mt Wilhelm	Malaise	P2603	2143	2200	MAL-MW2200C-14/16-d14
TW00085	Cicadellidae	Sp259	1	Mt Wilhelm	Malaise	P2604	11590	2200	MAL-MW2200C-15/16-d15
TW00086	Achilidae (Rhotala sp)	Sp304	1	Mt Wilhelm	Malaise	P2604	11590	2200	MAL-MW2200C-15/16-d15
TW00087	Heteroptera	Sp284	1	Mt Wilhelm	Malaise	P2604	11590	2200	MAL-MW2200C-15/16-d15
TW00088	Cicadellidae (larve)	Sp305	1	Mt Wilhelm	Malaise	P2605	11593	2200	MAL-MW2200C-16/16-d16
TW00089	Derbidae	Sp296	1	Mt Wilhelm	Malaise	P2606	11587	2200	MAL-MW2200D-01/16-d01
TW00090	Heteroptera	Sp306	1	Mt Wilhelm	Malaise	P2606	11587	2200	MAL-MW2200D-01/16-d01
TW00091	Cercopidae	Sp279	1	Mt Wilhelm	Malaise	P2606	11587	2200	MAL-MW2200D-01/16-d01
TW00092	Heteroptera	Sp188	2	Mt Wilhelm	Malaise	P2606	11587	2200	MAL-MW2200D-01/16-d01
TW00093	Cicadellidae	Sp265	1	Mt Wilhelm	Malaise	P2606	11587	2200	MAL-MW2200D-01/16-d01
TW00094	Derbidae	Sp307	1	Mt Wilhelm	Malaise	P2607	11589	2200	MAL-MW2200D-02/16-d02
TW00095	Cicadellidae	Sp269	1	Mt Wilhelm	Malaise	P2607	11589	2200	MAL-MW2200D-02/16-d02
TW00096	Heteroptera	Sp308	1	Mt Wilhelm	Malaise	P2607	11589	2200	MAL-MW2200D-02/16-d02
TW00097	Achilidae	Sp294	1	Mt Wilhelm	Malaise	P2608	11795	2200	MAL-MW2200D-03/16-d03
TW00098	Cicadellidae	Sp309	1	Mt Wilhelm	Malaise	P2609	11604	2200	MAL-MW2200D-04/16-d04
TW00099	Cicadellidae	Sp310	1	Mt Wilhelm	Malaise	P2611	11588	2200	MAL-MW2200D-06/16-d06
TW00100	Heteroptera	Sp311	1	Mt Wilhelm	Malaise	P2613	11849	2200	MAL-MW2200D-08/16-d08
TW00101	Cicadellidae	Sp312	1	Mt Wilhelm	Malaise	P2613	11849	2200	MAL-MW2200D-08/16-d08
TW00102	Achilidae	Sp313	1	Mt Wilhelm	Malaise	P2613	11849	2200	MAL-MW2200D-08/16-d08
TW00103	Meenoplidae	Sp295	1	Mt Wilhelm	Malaise	P2613	11849	2200	MAL-MW2200D-08/16-d08
TW00104	Cicadellidae	Sp268	1	Mt Wilhelm	Malaise	P2614	11595	2200	MAL-MW2200D-09/16-d09
TW00105	Cicadellidae	Sp268	1	Mt Wilhelm	Malaise	P2615	11623	2200	MAL-MW2200D-10/16-d10
TW00106	Cicadellidae	Sp314	1	Mt Wilhelm	Malaise	P2616	11622	2200	MAL-MW2200D-11/16-d11
TW00107	Cicadellidae	Sp269	1	Mt Wilhelm	Malaise	P2617	11834	2200	MAL-MW2200D-12/16-d12
TW00108	Heteroptera	Sp188	1	Mt Wilhelm	Malaise	P2617	11834	2200	MAL-MW2200D-12/16-d12
TW00109	Cicadellidae	Sp314	1	Mt Wilhelm	Malaise	P2621	11586	2200	MAL-MW2200D-16/16-d16
TW00110	Cicadellidae	Sp315	1	Mt Wilhelm	Malaise	P2621	11586	2200	MAL-MW2200D-16/16-d16
TW00111	Derbidae	Sp316	1	Mt Wilhelm	Malaise	P2621	11586	2200	MAL-MW2200D-16/16-d16
TW00112	Cicadellidae	Sp312	1	Mt Wilhelm	Malaise	P2618	11624	2200	MAL-MW2200D-13/16-d13
TW00113	Cicadellidae	Sp317	1	Mt Wilhelm	Malaise	P2618	11624	2200	MAL-MW2200D-13/16-d13
TW00114	Heteroptera	Sp318	1	Mt Wilhelm	Malaise	P2619	2138	2200	MAL-MW2200D-14/16-d14
TW00115	Cicadellidae	Sp309	1	Mt Wilhelm	Malaise	P2620	11592	2200	MAL-MW2200D-15/16-d15
TW00116	Cicadellidae	Sp319	1	Mt Wilhelm	Malaise	P2620	11592	2200	MAL-MW2200D-15/16-d15
TW00117	Cixiidae	Sp320	1	Mt Wilhelm	Malaise	P2620	11619	2200	MAL-MW2200D-15/16-d15
TW00118	Cixiidae	Sp321	1	Mt Wilhelm	Malaise	P2620	11619	2200	MAL-MW2200D-15/16-d15
TW00119	Cicadellidae	Sp322	1	Mt Wilhelm	Malaise	P2620	11619	2200	MAL-MW2200D-15/16-d15
TW00120	Cicadellidae	Sp259	1	Mt Wilhelm	Malaise	P2558	11608	2200	MAL-MW2200A-01/16-d01
TW00121	Cicadellidae	Sp269	1	Mt Wilhelm	Malaise	P2558	11608	2200	MAL-MW2200A-01/16-d01
TW00122	Heteroptera	Sp188	1	Mt Wilhelm	Malaise	P2558	11608	2200	MAL-MW2200A-01/16-d01
TW00123	Cicadellidae	Sp317	1	Mt Wilhelm	Malaise	P2558	11608	2200	MAL-MW2200A-01/16-d01
TW00124	Cicadellidae	Sp323	1	Mt Wilhelm	Malaise	P2558	11608	2200	MAL-MW2200A-01/16-d01
TW00125	Cicadidae	Sp324	1	Mt Wilhelm	Malaise	P2558	11608	2200	MAL-MW2200A-01/16-d01
		Total :	140
MY001	Cercopidae	Sp279	1	Mt Wilhelm	Malaise	P2272		2200
MY002	Achilidae (Rhotala sp)	Sp263	1	Mt Wilhelm	Malaise	P2385	11605	2200
MY003	Cicadellidae	Sp325	1	Mt Wilhelm	Malaise	P2401		2200
MY004	Cixiidae	Sp326	1	Mt Wilhelm	Malaise	P2401		2200
MY005	Delphacidae (Larve et adulte)	Sp327	3	Mt Wilhelm	Malaise		11584	2200
MY006	Cercopidae	Sp328	2	Mt Wilhelm	Malaise		11584	2200
MY007	Heteroptera	Sp329	2	Mt Wilhelm	Malaise		11584	2200
MY008	Heteroptera	Sp330	1	Mt Wilhelm	Malaise		11584	2200
MY009	Heteroptera	Sp331	8	Mt Wilhelm	Malaise		11584	2200
MY010	Cercopidae	Sp332	1	Mt Wilhelm	Malaise		11584	2200
MY011	Achilidae	Sp294	1	Mt Wilhelm	Malaise		11584	2200
MY012	Achilidae (Rhotala sp, larve)	Sp263	3	Mt Wilhelm	Malaise		11584	2200
		Total :	25
	Total different species	81		Total Abundance	165
	Total cicadellidae species	40		Total cicadellidae	85
	Total achilidae species	7		Total Fulgoromorpha	35
	Total cixiidae species	4
	Total derbidae species	5		Total major sp (sp259)	15
	Total delphacidae species	2		% total	0.0909091
	Total cercopidae species	4		% cicadellidae	0.176471
	Cixiidae	4
	Heteroptera	27
	Psylloidea	0
	Derbidae	7
	Delphacidae	2
	Fulgoromorpha	2
	Achilidae	19
	Cercopidae	8
	Meenoplidae	2

## Sheet: Mt Wilhelm 1700m
					Key to the code	MAL: Malaise - MW: Mount Wilhelm, 1700: elevation (m), A: plot - xx/16: day xx/16 - dxx: day xx
MNHN Voucher	Taxa	Species	abundance	Site	Method	Short sample code	Val number	Altitude (m)	detailed sample code
TX00001	Achilidae (Rhotala sp)	Sp333	1	Mt Wilhelm	Malaise	P2168	6342	1700	MAL-MW1700A-01/16-d01
TX00002	Delphacidae	Sp334	1	Mt Wilhelm	Malaise	P2168	6342	1700	MAL-MW1700A-01/16-d01
TX00003	Heteroptera	Sp335	1	Mt Wilhelm	Malaise	P2168	6342	1700	MAL-MW1700A-01/16-d01
TX00004	Cicadellidae	Sp292	2	Mt Wilhelm	Malaise	P2168	6342	1700	MAL-MW1700A-01/16-d01
TX00005	Cicadellidae	Sp336	3	Mt Wilhelm	Malaise	P2168	6342	1700	MAL-MW1700A-01/16-d01
TX00006	Cicadellidae	Sp337	9	Mt Wilhelm	Malaise	P2168	6342	1700	MAL-MW1700A-01/16-d01
TX00007	Cixiidae	Sp338	1	Mt Wilhelm	Malaise	P2168	6342	1700	MAL-MW1700A-01/16-d01
TX00008	Cicadellidae	Sp337	2	Mt Wilhelm	Malaise	P2169	6370	1700	MAL-MW1700A-02/16-d02
TX00009	Cicadellidae	Sp336	1	Mt Wilhelm	Malaise	P2169	6370	1700	MAL-MW1700A-02/16-d02
TX00010	Cicadellidae	Sp339	2	Mt Wilhelm	Malaise	P2169	6370	1700	MAL-MW1700A-02/16-d02
TX00011	Bennaria mareagnesia (Hoch, 2011)	Sp340	1	Mt Wilhelm	Malaise	P2169	6370	1700	MAL-MW1700A-02/16-d02
TX00012	Fulgoromorpha (lave)	Sp341	1	Mt Wilhelm	Malaise	P2169	6370	1700	MAL-MW1700A-02/16-d02
TX00013	Cicadellidae	Sp292	1	Mt Wilhelm	Malaise	P2171	6309	1700	MAL-MW1700A-04/16-d04
TX00014	Cicadellidae	Sp337	2	Mt Wilhelm	Malaise	P2171	6309	1700	MAL-MW1700A-04/16-d04
TX00015	Cicadellidae	Sp339	1	Mt Wilhelm	Malaise	P2171	6309	1700	MAL-MW1700A-04/16-d04
TX00016	Cicadellidae	Sp342	4	Mt Wilhelm	Malaise	P2171	6309	1700	MAL-MW1700A-04/16-d04
TX00017	Heteroptera	Sp343	1	Mt Wilhelm	Malaise	P2171	6309	1700	MAL-MW1700A-04/16-d04
TX00018	Cicadellidae	Sp337	2	Mt Wilhelm	Malaise	P2172	6297	1700	MAL-MW1700A-05/16-d05
TX00019	Heteroptera	Sp344	1	Mt Wilhelm	Malaise	P2172	6297	1700	MAL-MW1700A-05/16-d05
TX00020	Cercopidae	Sp345	1	Mt Wilhelm	Malaise	P2172	6297	1700	MAL-MW1700A-05/16-d05
TX00021	Cicadellidae	Sp337	7	Mt Wilhelm	Malaise	P2173	6260	1700	MAL-MW1700A-06/16-d06
TX00022	Cicadellidae	Sp336	1	Mt Wilhelm	Malaise	P2173	6260	1700	MAL-MW1700A-06/16-d06
TX00023	Cixiidae	Sp346	1	Mt Wilhelm	Malaise	P2173	6260	1700	MAL-MW1700A-06/16-d06
TX00024	Cicadellidae	Sp337	3	Mt Wilhelm	Malaise	P2174	6282	1700	MAL-MW1700A-07/17-d07
TX00025	Cicadellidae	Sp317	2	Mt Wilhelm	Malaise	P2174	6336	1700	MAL-MW1700A-07/17-d07
TX00026	Cicadellidae	Sp292	1	Mt Wilhelm	Malaise	P2175	6366	1700	MAL-MW1700A-08/16-d08
TX00027	Cicadellidae	Sp336	2	Mt Wilhelm	Malaise	P2175	6366	1700	MAL-MW1700A-08/16-d08
TX00028	Cicadellidae	Sp337	3	Mt Wilhelm	Malaise	P2175	6366	1700	MAL-MW1700A-08/16-d08
TX00029	Cicadellidae	Sp342	3	Mt Wilhelm	Malaise	P2175	6366	1700	MAL-MW1700A-08/16-d08
TX00030	Cixiidae	Sp347	1	Mt Wilhelm	Malaise	P2175	6366	1700	MAL-MW1700A-08/16-d08
TX00031	Cicadellidae	Sp348	1	Mt Wilhelm	Malaise	P2175	6366	1700	MAL-MW1700A-08/16-d08
TX00032	Cicadellidae	Sp336	3	Mt Wilhelm	Malaise	P2176	6347	1700	MAL-MW1700A-09/16-d09
TX00033	Cicadellidae (Larve)	Sp349	1	Mt Wilhelm	Malaise	P2176	6347	1700	MAL-MW1700A-09/16-d09
TX00034	Bennaria mareagnesia (Hoch, 2011)	Sp340	1	Mt Wilhelm	Malaise	P2176	6347	1700	MAL-MW1700A-09/16-d09
TX00035	Cixiidae	Sp350	2	Mt Wilhelm	Malaise	P2176	6347	1700	MAL-MW1700A-09/16-d09
TX00036	Cicadellidae	Sp342	5	Mt Wilhelm	Malaise	P2177	6305	1700	MAL-MW1700A-10/16-d10
TX00037	Cicadellidae	Sp337	2	Mt Wilhelm	Malaise	P2177	6305	1700	MAL-MW1700A-10/16-d10
TX00038	Cicadellidae	Sp336	1	Mt Wilhelm	Malaise	P2177	6305	1700	MAL-MW1700A-10/16-d10
TX00039	Cicadellidae	Sp339	1	Mt Wilhelm	Malaise	P2177	6305	1700	MAL-MW1700A-10/16-d10
TX00040	Cicadellidae	Sp351	1	Mt Wilhelm	Malaise	P2177	6305	1700	MAL-MW1700A-10/16-d10
TX00041	Cicadellidae (Typhlocybinae)	Sp352	1	Mt Wilhelm	Malaise	P2177	6305	1700	MAL-MW1700A-10/16-d10
TX00042	Cicadellidae	Sp342	2	Mt Wilhelm	Malaise	P2178	6350	1700	MAL-MW1700A-11/16-d11
TX00043	Cicadellidae	Sp337	1	Mt Wilhelm	Malaise	P2178	6350	1700	MAL-MW1700A-11/16-d11
TX00044	Heteroptera	Sp353	1	Mt Wilhelm	Malaise	P2178	6350	1700	MAL-MW1700A-11/16-d11
TX00045	Cicadellidae	Sp337	4	Mt Wilhelm	Malaise	P2179	6296	1700	MAL-MW1700A-12/16-d12
TX00046	Cixiidae	Sp350	1	Mt Wilhelm	Malaise	P2179	6296	1700	MAL-MW1700A-12/16-d12
TX00047	Cicadellidae	Sp337	4	Mt Wilhelm	Malaise	P2180	6255	1700	MAL-MW1700A-13/16-d13
TX00048	Cicadellidae	Sp336	2	Mt Wilhelm	Malaise	P2180	6255	1700	MAL-MW1700A-13/16-d13
TX00049	Cicadellidae	Sp342	1	Mt Wilhelm	Malaise	P2180	6255	1700	MAL-MW1700A-13/16-d13
TX00050	Cixiidae	Sp350	1	Mt Wilhelm	Malaise	P2180	6255	1700	MAL-MW1700A-13/16-d13
TX00051	Cicadellidae	Sp337	2	Mt Wilhelm	Malaise	P2181	6271	1700	MAL-MW1700A-14/16-d14
TX00052	Cicadellidae	Sp342	1	Mt Wilhelm	Malaise	P2181	6271	1700	MAL-MW1700A-14/16-d14
TX00053	Cicadellidae	Sp339	1	Mt Wilhelm	Malaise	P2181	6271	1700	MAL-MW1700A-14/16-d14
TX00054	Fulgoromorpha (larve)	Sp354	1	Mt Wilhelm	Malaise	P2181	6271	1700	MAL-MW1700A-14/16-d14
TX00055	Cicadellidae	Sp337	1	Mt Wilhelm	Malaise	P2182	6274	1700	MAL-MW1700A-15/16-d15
TX00056	Cicadellidae	Sp337	2	Mt Wilhelm	Malaise	P2183	6291	1700	MAL-MW1700A-16/16-d16
TX00057	Membracidae	Sp355	1	Mt Wilhelm	Malaise	P2183	6291	1700	MAL-MW1700A-16/16-d16
TX00058	Cicadellidae	Sp356	1	Mt Wilhelm	Malaise	P2183	6291	1700	MAL-MW1700A-16/16-d16
TX00059	Bennaria mareagnesia (Hoch, 2011)	Sp340	2	Mt Wilhelm	Malaise	P2183	6291	1700	MAL-MW1700A-16/16-d16
TX00060	Cicadellidae	Sp357	2	Mt Wilhelm	Malaise	P2183	6291	1700	MAL-MW1700A-16/16-d16
TX00061	Derbidae	Sp358	1	Mt Wilhelm	Malaise	P2183	6291	1700	MAL-MW1700A-16/16-d16
TX00062	Heteroptera	Sp343	1	Mt Wilhelm	Malaise	P2183	6291	1700	MAL-MW1700A-16/16-d16
TX00063	Cicadellidae (Larve)	Sp359	1	Mt Wilhelm	Malaise	P2183	6291	1700	MAL-MW1700A-16/16-d16
TX00064	Aphrophoridae	Sp360	1	Mt Wilhelm	Malaise	P2184	6275	1700	MAL-MW1700B-01/16-d01
TX00065	Heteroptera	Sp361	43	Mt Wilhelm	Malaise	P2185	6283	1700	MAL-MW1700B-02/16-d02
TX00066	Heteroptera	Sp362	2	Mt Wilhelm	Malaise	P2185	6283	1700	MAL-MW1700B-02/16-d02
TX00067	Cicadellidae	Sp337	2	Mt Wilhelm	Malaise	P2185	6283	1700	MAL-MW1700B-02/16-d02
TX00068	Fulgoromorpha (larve)	Sp363	9	Mt Wilhelm	Malaise	P2185	6283	1700	MAL-MW1700B-02/16-d02
TX00069	Cicadellidae	Sp364	1	Mt Wilhelm	Malaise	P2185	6283	1700	MAL-MW1700B-02/16-d02
TX00070	Dictyopharidae	Sp365	1	Mt Wilhelm	Malaise	P2185	6283	1700	MAL-MW1700B-02/16-d02
TX00071	Cixiidae	Sp338	4	Mt Wilhelm	Malaise	P2185	6283	1700	MAL-MW1700B-02/16-d02
TX00072	Cercopidae	Sp366	1	Mt Wilhelm	Malaise	P2185	6283	1700	MAL-MW1700B-02/16-d02
TX00073	Delphacidae (larve)	Sp367	1	Mt Wilhelm	Malaise	P2185	6283	1700	MAL-MW1700B-02/16-d02
TX00074	Delphacidae	Sp368	1	Mt Wilhelm	Malaise	P2185	6283	1700	MAL-MW1700B-02/16-d02
TX00075	Cicadellidae	Sp337	1	Mt Wilhelm	Malaise	P2186	6281	1700	MAL-MW1700B-03/16-d03
TX00076	Cicadellidae	Sp337	1	Mt Wilhelm	Malaise	P2187	6264	1700	MAL-MW1700B-04/16-d04
TX00077	Cicadellidae	Sp342	1	Mt Wilhelm	Malaise	P2187	6264	1700	MAL-MW1700B-04/16-d04
TX00078	Cicadellidae	Sp337	1	Mt Wilhelm	Malaise	P2190	9693	1700	MAL-MW1700B-07/16-d07
TX00079	Heteroptera	Sp369	1	Mt Wilhelm	Malaise	P2190	9693	1700	MAL-MW1700B-07/16-d07
TX00080	Cicadellidae	Sp357	1	Mt Wilhelm	Malaise	P2191	6256	1700	MAL-MW1700B-08/16-d08
TX00081	Achilidae (Rhotala sp)	Sp333	1	Mt Wilhelm	Malaise	P2191	6256	1700	MAL-MW1700B-08/16-d08
TX00082	Cicadellidae	Sp342	1	Mt Wilhelm	Malaise	P2192	6352	1700	MAL-MW1700B-09/16-d09
TX00083	Cicadellidae	Sp337	1	Mt Wilhelm	Malaise	P2196	6349	1700	MAL-MW1700B-13/16-d13
TX00084	Derbidae	Sp370	1	Mt Wilhelm	Malaise	P2196	6349	1700	MAL-MW1700B-13/16-d13
TX00085	Cicadellidae	Sp337	1	Mt Wilhelm	Malaise	P2199	6340	1700	MAL-MW1700B-16/16-d16
TX00086	Cicadellidae	Sp292	4	Mt Wilhelm	Malaise	P2200	6270	1700	MAL-MW1700C-01/16-d01
TX00087	Cicadellidae	Sp336	4	Mt Wilhelm	Malaise	P2200	6270	1700	MAL-MW1700C-01/16-d01
TX00088	Cicadellidae	Sp337	2	Mt Wilhelm	Malaise	P2200	6270	1700	MAL-MW1700C-01/16-d01
TX00089	Cicadellidae	Sp339	1	Mt Wilhelm	Malaise	P2200	6270	1700	MAL-MW1700C-01/16-d01
TX00090	Cixiidae	Sp338	1	Mt Wilhelm	Malaise	P2200	6270	1700	MAL-MW1700C-01/16-d01
TX00091	Derbidae	Sp371	1	Mt Wilhelm	Malaise	P2200	6270	1700	MAL-MW1700C-01/16-d01
TX00092	Cicadellidae	Sp292	1	Mt Wilhelm	Malaise	P2201	6284	1700	MAL-MW1700C-02/16-d02
TX00093	Bennaria mareagnesia (Hoch, 2011)	Sp340	1	Mt Wilhelm	Malaise	P2201	6284	1700	MAL-MW1700C-02/16-d02
TX00094	Cicadellidae	Sp337	1	Mt Wilhelm	Malaise	P2202	6266	1700	MAL-MW1700C-03/16-d03
TX00095	Cicadellidae	Sp342	1	Mt Wilhelm	Malaise	P2202	6266	1700	MAL-MW1700C-03/16-d03
TX00096	Cicadellidae	Sp292	1	Mt Wilhelm	Malaise	P2203	6300	1700	MAL-MW1700C-04/16-d04
TX00097	Derbidae	Sp371	1	Mt Wilhelm	Malaise	P2203	6300	1700	MAL-MW1700C-04/16-d04
TX00098	Cicadellidae	Sp337	1	Mt Wilhelm	Malaise	P2205	6328	1700	MAL-MW1700C-06/16-d06
TX00099	Cicadellidae	Sp339	1	Mt Wilhelm	Malaise	P2208	6326	1700	MAL-MW1700C-09/16-d09
TX00100	Heteroptera	Sp188	2	Mt Wilhelm	Malaise	P2208	6326	1700	MAL-MW1700C-09/16-d09
TX00101	Cicadellidae	Sp337	1	Mt Wilhelm	Malaise	P2210	6312	1700	MAL-MW1700C-11/16-d11
TX00102	Cicadellidae	Sp372	1	Mt Wilhelm	Malaise	P2211	6362	1700	MAL-MW1700C-12/16-d12
TX00103	Cicadellidae	Sp372	1	Mt Wilhelm	Malaise	P2212	6374	1700	MAL-MW1700C-13/16-d13
TX00104	Cicadellidae	Sp337	1	Mt Wilhelm	Malaise	P2215	6344	1700	MAL-MW1700C-16/16-d16
TX00105	Cicadellidae	Sp342	1	Mt Wilhelm	Malaise	P2215	6344	1700	MAL-MW1700C-16/16-d16
TX00106	Heteroptera	Sp373	1	Mt Wilhelm	Malaise	P2215	6269	1700	MAL-MW1700C-16/16-d16
TX00107	Cicadellidae	Sp292	1	Mt Wilhelm	Malaise	P2216	6262	1700	MAL-MW1700D-01/16-d01
TX00108	Cicadellidae	Sp342	3	Mt Wilhelm	Malaise	P2216	6262	1700	MAL-MW1700D-01/16-d01
TX00109	Cicadellidae	Sp337	1	Mt Wilhelm	Malaise	P2216	6262	1700	MAL-MW1700D-01/16-d01
TX00110	Cicadellidae	Sp336	1	Mt Wilhelm	Malaise	P2216	6262	1700	MAL-MW1700D-01/16-d01
TX00111	Cicadellidae	Sp180	1	Mt Wilhelm	Malaise	P2216	6262	1700	MAL-MW1700D-01/16-d01
TX00112	Cicadellidae	Sp374	1	Mt Wilhelm	Malaise	P2216	6262	1700	MAL-MW1700D-01/16-d01
TX00113	Cicadellidae	Sp375	1	Mt Wilhelm	Malaise	P2216	6262	1700	MAL-MW1700D-01/16-d01
TX00114	Cicadellidae	Sp376	1	Mt Wilhelm	Malaise	P2216	6262	1700	MAL-MW1700D-01/16-d01
TX00115	Cicadellidae	Sp377	1	Mt Wilhelm	Malaise	P2216	6262	1700	MAL-MW1700D-01/16-d01
TX00116	Derbidae	Sp378	2	Mt Wilhelm	Malaise	P2216	6262	1700	MAL-MW1700D-01/16-d01
TX00117	Derbidae	Sp379	1	Mt Wilhelm	Malaise	P2216	6262	1700	MAL-MW1700D-01/16-d01
TX00118	Achilidae	Sp380	1	Mt Wilhelm	Malaise	P2216	6262	1700	MAL-MW1700D-01/16-d01
TX00119	Heteroptera	Sp381	1	Mt Wilhelm	Malaise	P2216	6262	1700	MAL-MW1700D-01/16-d01
TX00120	Cicadellidae	Sp337	1	Mt Wilhelm	Malaise	P2217	6373	1700	MAL-MW1700D-02/16-d02
TX00121	Cicadellidae	Sp342	1	Mt Wilhelm	Malaise	P2217	6373	1700	MAL-MW1700D-02/16-d02
TX00122	Cicadellidae	Sp382	1	Mt Wilhelm	Malaise	P2217	6373	1700	MAL-MW1700D-02/16-d02
TX00123	Cicadellidae	Sp259	1	Mt Wilhelm	Malaise	P2218	6273	1700	MAL-MW1700D-03/16-d03
TX00124	Cicadellidae	Sp382	1	Mt Wilhelm	Malaise	P2218	6273	1700	MAL-MW1700D-03/16-d03
TX00125	Cicadellidae	Sp383	1	Mt Wilhelm	Malaise	P2218	6273	1700	MAL-MW1700D-03/16-d03
TX00126	Heteroptera	Sp308	1	Mt Wilhelm	Malaise	P2218	6273	1700	MAL-MW1700D-03/16-d03
TX00127	Achilidae (Rhotala sp, larve)	Sp333	1	Mt Wilhelm	Malaise	P2219	6267	1700	MAL-MW1700D-04/16-d04
TX00128	Cicadellidae	Sp383	1	Mt Wilhelm	Malaise	P2219	6267	1700	MAL-MW1700D-04/16-d04
TX00129	Cicadellidae	Sp384	1	Mt Wilhelm	Malaise	P2219	6267	1700	MAL-MW1700D-04/16-d04
TX00130	Heteroptera	Sp385	1	Mt Wilhelm	Malaise	P2219	6267	1700	MAL-MW1700D-04/16-d04
TX00131	Derbidae	Sp371	1	Mt Wilhelm	Malaise	P2220	6299	1700	MAL-MW1700D-05/16-d05
TX00132	Cercopidae	Sp279	1	Mt Wilhelm	Malaise	P2221	6304	1700	MAL-MW1700D-06/16-d06
TX00133	Cicadellidae	Sp292	1	Mt Wilhelm	Malaise	P2221	6304	1700	MAL-MW1700D-06/16-d06
TX00134	Cicadellidae	Sp337	1	Mt Wilhelm	Malaise	P2221	6304	1700	MAL-MW1700D-06/16-d06
TX00135	Derbidae	Sp386	1	Mt Wilhelm	Malaise	P2221	6304	1700	MAL-MW1700D-06/16-d06
TX00136	Fulgoromorpha (larve)	Sp387	1	Mt Wilhelm	Malaise	P2221	6304	1700	MAL-MW1700D-06/16-d06
TX00137	Cicadellidae	Sp292	1	Mt Wilhelm	Malaise	P2222	6320	1700	MAL-MW1700D-07/16-d07
TX00138	Cicadellidae	Sp342	1	Mt Wilhelm	Malaise	P2222	6320	1700	MAL-MW1700D-07/16-d07
TX00139	Cicadellidae	SP337	1	Mt Wilhelm	Malaise	P2222	6320	1700	MAL-MW1700D-07/16-d07
TX00140	Cicadellidae	Sp388	1	Mt Wilhelm	Malaise	P2222	6320	1700	MAL-MW1700D-07/16-d07
TX00141	Cicadellidae	Sp342	1	Mt Wilhelm	Malaise	P2223	6278	1700	MAL-MW1700D-08/16-d08
TX00142	Heteroptera	Sp389	1	Mt Wilhelm	Malaise	P2223	6278	1700	MAL-MW1700D-08/16-d08
TX00143	Cicadellidae	Sp372	1	Mt Wilhelm	Malaise	P2224	6356	1700	MAL-MW1700D-09/16-d09
TX00144	Cicadellidae (Typhlocybinae)	Sp352	1	Mt Wilhelm	Malaise	P2224	6356	1700	MAL-MW1700D-09/16-d09
TX00145	Cicadellidae (Typhlocybinae)	Sp390	1	Mt Wilhelm	Malaise	P2224	6356	1700	MAL-MW1700D-09/16-d09
TX00146	Cicadellidae	Sp351	1	Mt Wilhelm	Malaise	P2224	6356	1700	MAL-MW1700D-09/16-d09
TX00147	Cicadellidae	Sp337	1	Mt Wilhelm	Malaise	P2225	6308	1700	MAL-MW1700D-10/16-d10
TX00148	Cicadellidae	Sp342	1	Mt Wilhelm	Malaise	P2225	6308	1700	MAL-MW1700D-10/16-d10
TX00149	Cicadellidae	Sp377	1	Mt Wilhelm	Malaise	P2225	6308	1700	MAL-MW1700D-10/16-d10
TX00150	Cicadellidae	Sp337	1	Mt Wilhelm	Malaise	P2226	6259	1700	MAL-MW1700D-11/16-d11
TX00151	Cicadellidae	Sp342	1	Mt Wilhelm	Malaise	P2226	6259	1700	MAL-MW1700D-11/16-d11
TX00152	Cixiidae	Sp391	1	Mt Wilhelm	Malaise	P2227	6322	1700	MAL-MW1700D-12/16-d12
TX00153	Psocoptera	Sp392	1	Mt Wilhelm	Malaise	P2227	6322	1700	MAL-MW1700D-12/16-d12
TX00154	Cicadellidae	Sp342	1	Mt Wilhelm	Malaise	P2228	6330	1700	MAL-MW1700D-13/16-d13
TX00155	Cixiidae	Sp338	1	Mt Wilhelm	Malaise	P2228	6330	1700	MAL-MW1700D-13/16-d13
TX00156	Cicadellidae (Typhlocybinae)	Sp393	1	Mt Wilhelm	Malaise	P2228	6330	1700	MAL-MW1700D-13/16-d13
TX00157	Flatidae	Sp394	1	Mt Wilhelm	Malaise	P2229	6252	1700	MAL-MW1700D-14/16-d14
TX00158	Derbidae	Sp395	1	Mt Wilhelm	Malaise	P2229	6252	1700	MAL-MW1700D-14/16-d14
TX00159	Cicadellidae	Sp292	1	Mt Wilhelm	Malaise	P2230	6345	1700	MAL-MW1700D-15/16-d15
TX00160	Cixiidae	Sp396	1	Mt Wilhelm	Malaise	P2230	6345	1700	MAL-MW1700D-15/16-d15
TX00161	Cicadellidae	Sp292	1	Mt Wilhelm	Malaise	P2231	6324	1700	MAL-MW1700D-16/16-d16
TX00162	Cicadellidae	Sp337	1	Mt Wilhelm	Malaise	P2231	6324	1700	MAL-MW1700D-16/16-d16
TX00163	Cicadellidae	Sp339	1	Mt Wilhelm	Malaise	P2231	6324	1700	MAL-MW1700D-16/16-d16
TX00164	Cixiidae	Sp396	1	Mt Wilhelm	Malaise	P2231	6324	1700	MAL-MW1700D-16/16-d16
TX00165	Cicadellidae	Sp336	1	Mt Wilhelm	Malaise	P2170	6263	1700	MAL-MW1700A-03/16-d03
TX00166	Cicadellidae	Sp339	1	Mt Wilhelm	Malaise	P2170	6263	1700	MAL-MW1700A-03/16-d03
TX00167	Cicadellidae	Sp342	2	Mt Wilhelm	Malaise	P2170	6263	1700	MAL-MW1700A-03/16-d03
TX00168	Cicadellidae	Sp377	1	Mt Wilhelm	Malaise	P2170	6263	1700	MAL-MW1700A-03/16-d03
TX00169	Cicadidae	Sp397	1	Mt Wilhelm	Malaise	P2170	6263	1700	MAL-MW1700A-03/16-d03
	Total different species	71		Total Abundance	288
	Total cicadellidae species	27		Total cicadellidae	170
	Total achilidae species	2		Total Fulgoromorpha	41
	Total cixiidae species	7
	Total derbidae species	7		Total major sp (sp337)	64
	Total delphacidae species	3		% total	0.222222
	Total cercopidae species	3		% cicadellidae	0.376471
	Cixiidae	16
	Heteroptera	58
	Derbidae	10
	Delphacidae	3
	Fulgoromorpha	12
	Achilidae	4
	Cercopidae	3
	Meenoplidae	2
	Flatidae	1

## Sheet: Mt Wilhelm 1200m
					Key to the code	MAL: Malaise - MW: Mount Wilhelm, 1200: elevation (m), A: plot - xx/16: day xx/16 - dxx: day xx
MNHN Voucher	Taxa	Species	abundance	Site	Method	Short sample code	Val number	Altitude (m)	detailed sample code
TY00001	Cicadellidae	Sp398	1	Mt Wilhelm	Malaise	P1778	9698	1200	MAL-MW1200A-01/16-d01
TY00002	Derbidae	Sp399	1	Mt Wilhelm	Malaise	P1778	9698	1200	MAL-MW1200A-01/16-d01
TY00003	Cicadellidae	Sp400	1	Mt Wilhelm	Malaise	P1778	9698	1200	MAL-MW1200A-01/16-d01
TY00004	Achilidae	Sp234	1	Mt Wilhelm	Malaise	P1778	9698	1200	MAL-MW1200A-01/16-d01
TY00005	Cicadellidae	Sp401	3	Mt Wilhelm	Malaise	P1779	6329	1200	MAL-MW1200A-02/16-d02
TY00006	Cicadellidae	Sp402	1	Mt Wilhelm	Malaise	P1779	6329	1200	MAL-MW1200A-02/16-d02
TY00007	Cicadellidae	Sp337	1	Mt Wilhelm	Malaise	P1781	6319	1200	MAL-MW1200A-04/16-d04
TY00008	Cicadellidae	Sp403	1	Mt Wilhelm	Malaise	P1781	6319	1200	MAL-MW1200A-04/16-d04
TY00009	Derbidae	Sp404	1	Mt Wilhelm	Malaise	P1781	6319	1200	MAL-MW1200A-04/16-d04
TY00010	Derbidae	Sp405	1	Mt Wilhelm	Malaise	P1781	6319	1200	MAL-MW1200A-04/16-d04
TY00011	Cicadellidae	Sp337	2	Mt Wilhelm	Malaise	P1782	9689	1200	MAL-MW1200A-05/16-d05
TY00012	Cicadellidae	Sp402	1	Mt Wilhelm	Malaise	P1782	9689	1200	MAL-MW1200A-05/16-d05
TY00013	Heteroptera	Sp406	1	Mt Wilhelm	Malaise	P1782	9689	1200	MAL-MW1200A-05/16-d05
TY00014	Cicadellidae	Sp337	1	Mt Wilhelm	Malaise	P1783	9739	1200	MAL-MW1200A-06/16-d06
TY00015	Cicadellidae	Sp407	1	Mt Wilhelm	Malaise	P1784	9722	1200	MAL-MW1200A-07/16-d07
TY00016	Derbidae	Sp408	1	Mt Wilhelm	Malaise	P1784	9722	1200	MAL-MW1200A-07/16-d07
TY00017	Cicadellidae	Sp409	1	Mt Wilhelm	Malaise	P1786	6327	1200	MAL-MW1200A-09/16-d09
TY00018	Cicadellidae	Sp410	1	Mt Wilhelm	Malaise	P1786	6327	1200	MAL-MW1200A-09/16-d09
TY00019	Cicadellidae	Sp411	1	Mt Wilhelm	Malaise	P1787	6276	1200	MAL-MW1200A-10/16-d10
TY00020	Heteroptera	Sp412	1	Mt Wilhelm	Malaise	P1787	6276	1200	MAL-MW1200A-10/16-d10
TY00021	Cercopidae	Sp413	1	Mt Wilhelm	Malaise	P1787	6276	1200	MAL-MW1200A-10/16-d10
TY00022	Cicadellidae	Sp402	1	Mt Wilhelm	Malaise	P1789	6375	1200	MAL-MW1200A-12/16-d12
TY00023	Derbidae	Sp414	1	Mt Wilhelm	Malaise	P1789	6375	1200	MAL-MW1200A-12/16-d12
TY00024	Cicadellidae	Sp415	1	Mt Wilhelm	Malaise	P1791	6279	1200	MAL-MW1200A-14/16-d14
TY00025	Heteroptera	Sp353	1	Mt Wilhelm	Malaise	P1791	6279	1200	MAL-MW1200A-14/16-d14
TY00026	Delphacidae	Sp368	1	Mt Wilhelm	Malaise	P1791	6279	1200	MAL-MW1200A-14/16-d14
TY00027	Cicadellidae	Sp402	1	Mt Wilhelm	Malaise	P1793	6358	1200	MAL-MW1200A-16/16-d16
TY00028	Cicadellidae	Sp337	5	Mt Wilhelm	Malaise	P1794	9738	1200	MAL-MW1200B-01/16-d01
TY00029	Cicadellidae	Sp410	2	Mt Wilhelm	Malaise	P1794	9738	1200	MAL-MW1200B-01/16-d01
TY00030	Cicadellidae	Sp336	1	Mt Wilhelm	Malaise	P1794	9738	1200	MAL-MW1200B-01/16-d01
TY00031	Cicadellidae	Sp416	1	Mt Wilhelm	Malaise	P1794	9738	1200	MAL-MW1200B-01/16-d01
TY00032	Achilidae	Sp417	1	Mt Wilhelm	Malaise	P1794	9738	1200	MAL-MW1200B-01/16-d01
TY00033	Issidae	Sp418	1	Mt Wilhelm	Malaise	P1794	9738	1200	MAL-MW1200B-01/16-d01
TY00034	Cixiidae	Sp419	2	Mt Wilhelm	Malaise	P1794	9738	1200	MAL-MW1200B-01/16-d01
TY00035	Flatidae	Sp420	1	Mt Wilhelm	Malaise	P1795	6334	1200	MAL-MW1200B-02/16-d02
TY00036	Fulgoromorpha (larve)	Sp421	1	Mt Wilhelm	Malaise	P1795	6334	1200	MAL-MW1200B-02/16-d02
TY00037	Cicadellidae	Sp402	1	Mt Wilhelm	Malaise	P1797	6363	1200	MAL-MW1200B-04/16-d04
TY00038	Cicadellidae	Sp422	1	Mt Wilhelm	Malaise	P1797	6363	1200	MAL-MW1200B-04/16-d04
TY00039	Cicadellidae	Sp409	1	Mt Wilhelm	Malaise	P1797	6363	1200	MAL-MW1200B-04/16-d04
TY00040	Cicadellidae	Sp423	1	Mt Wilhelm	Malaise	P1797	6363	1200	MAL-MW1200B-04/16-d04
TY00041	Achilidae	Sp424	1	Mt Wilhelm	Malaise	P1797	6363	1200	MAL-MW1200B-04/16-d04
TY00042	Cicadellidae	Sp337	1	Mt Wilhelm	Malaise	P1798	9687	1200	MAL-MW1200B-05/16-d05
TY00043	Cicadellidae	Sp409	1	Mt Wilhelm	Malaise	P1802	6353	1200	MAL-MW1200B-09/16-d09
TY00044	Delphacidae	Sp425	1	Mt Wilhelm	Malaise	P1802	6353	1200	MAL-MW1200B-09/16-d09
TY00045	Cicadellidae	Sp337	1	Mt Wilhelm	Malaise	P1803	9699	1200	MAL-MW1200B-10/16-d10
TY00046	Cicadellidae	Sp29	1	Mt Wilhelm	Malaise	P1803	9699	1200	MAL-MW1200B-10/16-d10
TY00047	Cicadellidae	Sp402	1	Mt Wilhelm	Malaise	P1803	9699	1200	MAL-MW1200B-10/16-d10
TY00048	Cicadellidae	Sp401	1	Mt Wilhelm	Malaise	P1803	9699	1200	MAL-MW1200B-10/16-d10
TY00049	Cicadellidae	Sp409	1	Mt Wilhelm	Malaise	P1803	9699	1200	MAL-MW1200B-10/16-d10
TY00050	Cicadellidae	Sp430	1	Mt Wilhelm	Malaise	P1803	9699	1200	MAL-MW1200B-10/16-d10
TY00051	Cicadellidae	Sp426	1	Mt Wilhelm	Malaise	P1803	9699	1200	MAL-MW1200B-10/16-d10
TY00052	Cicadellidae	Sp427	1	Mt Wilhelm	Malaise	P1803	9699	1200	MAL-MW1200B-10/16-d10
TY00053	Cicadellidae	Sp428	1	Mt Wilhelm	Malaise	P1803	9699	1200	MAL-MW1200B-10/16-d10
TY00054	Cicadellidae	Sp429	1	Mt Wilhelm	Malaise	P1803	9699	1200	MAL-MW1200B-10/16-d10
TY00055	Cicadellidae	Sp400	1	Mt Wilhelm	Malaise	P1805	6290	1200	MAL-MW1200B-12/16-d12
TY00056	Cicadellidae	Sp409	1	Mt Wilhelm	Malaise	P1805	6290	1200	MAL-MW1200B-12/16-d12
TY00057	Cicadellidae	Sp337	1	Mt Wilhelm	Malaise	P1811	6292	1200	MAL-MW1200C-02/16-d02
TY00058	Heteroptera	Sp431	1	Mt Wilhelm	Malaise	P1812	9749	1200	MAL-MW1200C-03/16-d03
TY00059	Cicadellidae	Sp432	1	Mt Wilhelm	Malaise	P1812	9749	1200	MAL-MW1200C-03/16-d03
TY00060	Cicadellidae	Sp337	1	Mt Wilhelm	Malaise	P1813	6294	1200	MAL-MW1200C-04/16-d04
TY00061	Cicadellidae	Sp409	1	Mt Wilhelm	Malaise	P1813	6294	1200	MAL-MW1200C-04/16-d04
TY00062	Cicadellidae	Sp433	1	Mt Wilhelm	Malaise	P1813	6294	1200	MAL-MW1200C-04/16-d04
TY00063	Derbidae	Sp434	2	Mt Wilhelm	Malaise	P1813	6294	1200	MAL-MW1200C-04/16-d04
TY00064	Cicadidae	Sp435	1	Mt Wilhelm	Malaise	P1815	9692	1200	MAL-MW1200C-06/16-d06
TY00065	Cicadellidae	Sp337	1	Mt Wilhelm	Malaise	P1816	9744	1200	MAL-MW1200C-07/16-d07
TY00066	Derbidae	Sp436	1	Mt Wilhelm	Malaise	P1816	9744	1200	MAL-MW1200C-07/16-d07
TY00067	Derbidae	Sp437	1	Mt Wilhelm	Malaise	P1817	6332	1200	MAL-MW1200C-08/16-d08
TY00068	Cixiidae	Sp438	1	Mt Wilhelm	Malaise	P1817	6332	1200	MAL-MW1200C-08/16-d08
TY00069	Cicadellidae	Sp439	1	Mt Wilhelm	Malaise	P1818	6303	1200	MAL-MW1200C-09/16-d09
TY00070	Flatidae	Sp420	1	Mt Wilhelm	Malaise	P1821	6289	1200	MAL-MW1200C-12/16-d12
TY00071	Cicadellidae	Sp440	1	Mt Wilhelm	Malaise	P1821	6289	1200	MAL-MW1200C-12/16-d12
TY00072	Cicadellidae	Sp441	1	Mt Wilhelm	Malaise	P1823	6277	1200	MAL-MW1200C-14/16-d14
TY00073	Cicadellidae	Sp442	1	Mt Wilhelm	Malaise	P1823	6277	1200	MAL-MW1200C-14/16-d14
TY00074	Cercopidae	Sp443	1	Mt Wilhelm	Malaise	P1825	6335	1200	MAL-MW1200C-16/16-d16
TY00075	Cicadellidae	Sp444	2	Mt Wilhelm	Malaise	P1825	6335	1200	MAL-MW1200C-16/16-d16
TY00076	Cicadellidae	Sp337	1	Mt Wilhelm	Malaise	P1827	6316	1200	MAL-MW1200D-02/16-d02
TY00077	Cicadellidae	Sp411	1	Mt Wilhelm	Malaise	P1827	6316	1200	MAL-MW1200D-02/16-d02
TY00078	Cicadellidae	Sp403	1	Mt Wilhelm	Malaise	P1827	6316	1200	MAL-MW1200D-02/16-d02
TY00079	Cicadellidae	Sp445	1	Mt Wilhelm	Malaise	P1827	6316	1200	MAL-MW1200D-02/16-d02
TY00080	Cicadellidae	Sp446	3	Mt Wilhelm	Malaise	P1827	6316	1200	MAL-MW1200D-02/16-d02
TY00081	Cercopidae	Sp447	1	Mt Wilhelm	Malaise	P1827	6316	1200	MAL-MW1200D-02/16-d02
TY00082	Cicadellidae	Sp446	3	Mt Wilhelm	Malaise	P1829	6318	1200	MAL-MW1200D-04/16-d04
TY00083	Cercopidae	Sp447	1	Mt Wilhelm	Malaise	P1829	6318	1200	MAL-MW1200D-04/16-d04
TY00084	Cixiidae	Sp448	1	Mt Wilhelm	Malaise	P1829	6318	1200	MAL-MW1200D-04/16-d04
TY00085	Cicadellidae	Sp337	1	Mt Wilhelm	Malaise	P1832	6333	1200	MAL-MW1200D-07/16-d07
TY00086	Cicadellidae	Sp446	2	Mt Wilhelm	Malaise	P1832	6333	1200	MAL-MW1200D-07/16-d07
TY00087	Cixiidae	Sp449	1	Mt Wilhelm	Malaise	P1832	6333	1200	MAL-MW1200D-07/16-d07
TY00088	Cixiidae	Sp450	1	Mt Wilhelm	Malaise	P1832	6333	1200	MAL-MW1200D-07/16-d07
TY00089	Cicadellidae	Sp402	1	Mt Wilhelm	Malaise	P1833	9742	1200	MAL-MW1200D-08/16-d08
TY00090	Cicadellidae	Sp411	1	Mt Wilhelm	Malaise	P1833	9742	1200	MAL-MW1200D-08/16-d08
TY00091	Cicadellidae	Sp337	1	Mt Wilhelm	Malaise	P1834	6310	1200	MAL-MW1200D-09/16-d09
TY00092	Cicadellidae	Sp446	1	Mt Wilhelm	Malaise	P1834	6310	1200	MAL-MW1200D-09/16-d09
TY00093	Cicadellidae	Sp401	1	Mt Wilhelm	Malaise	P1834	6310	1200	MAL-MW1200D-09/16-d09
TY00094	Cicadellidae	Sp451	1	Mt Wilhelm	Malaise	P1834	6310	1200	MAL-MW1200D-09/16-d09
TY00095	Achilidae	Sp448	1	Mt Wilhelm	Malaise	P1834	6310	1200	MAL-MW1200D-09/16-d09
TY00096	Cicadellidae	Sp446	5	Mt Wilhelm	Malaise	P1837	6272	1200	MAL-MW1200D-12/16-d12
TY00097	Cicadellidae	Sp452	1	Mt Wilhelm	Malaise	P1837	6272	1200	MAL-MW1200D-12/16-d12
TY00098	Cicadellidae	Sp453	1	Mt Wilhelm	Malaise	P1837	6272	1200	MAL-MW1200D-12/16-d12
TY00099	Cixiidae	Sp454	1	Mt Wilhelm	Malaise	P1837	6272	1200	MAL-MW1200D-12/16-d12
TY00100	Cixiidae	Sp455	1	Mt Wilhelm	Malaise	P1837	6272	1200	MAL-MW1200D-12/16-d12
TY00101	Cicadellidae	Sp446	3	Mt Wilhelm	Malaise	P1839	6314	1200	MAL-MW1200D-14/16-d14
TY00102	Cixiidae	Sp456	1	Mt Wilhelm	Malaise	P1839	6314	1200	MAL-MW1200D-14/16-d14
TY00103	Cicadellidae	Sp337	1	Mt Wilhelm	Malaise	P1840	6365	1200	MAL-MW1200D-15/16-d15
TY00104	Cicadellidae	Sp401	1	Mt Wilhelm	Malaise	P1840	6365	1200	MAL-MW1200D-15/16-d15
TY00105	Cicadellidae	Sp446	1	Mt Wilhelm	Malaise	P1840	6365	1200	MAL-MW1200D-15/16-d15
TY00106	Cicadellidae	Sp29	1	Mt Wilhelm	Malaise	P1840	6365	1200	MAL-MW1200D-15/16-d15
TY00107	Achilidae	Sp457	1	Mt Wilhelm	Malaise	P1840	6365	1200	MAL-MW1200D-15/16-d15
TY00108	Cicadellidae	Sp337	1	Mt Wilhelm	Malaise	P1841	6371	1200	MAL-MW1200D-16/16-d16
TY00109	Cicadellidae	Sp403	1	Mt Wilhelm	Malaise	P1841	6371	1200	MAL-MW1200D-16/16-d16
TY00110	Delphacidae	Sp458	1	Mt Wilhelm	Malaise	P1841	6371	1200	MAL-MW1200D-16/16-d16
TY00111	Cicadellidae	Sp459	1	Mt Wilhelm	Malaise	P1841	6371	1200	MAL-MW1200D-16/16-d16
	Total different species	67		Total Abundance	133
	Total cicadellidae species	34		Total cicadellidae	94
	Total achilidae species	5		Total Fulgoromorpha	25
	Total cixiidae species	7
	Total derbidae species	8		Total major sp (sp337)	19
	Total delphacidae species	3		% total	0.142857
	Total cercopidae species	3		% cicadellidae	0.202128
	Cixiidae	8
	Heteroptera	4
	Derbidae	9
	Delphacidae	3
	Fulgoromorpha	1
	Achilidae	6
	Cercopidae	4
	Meenoplidae	0
	Flatidae	2

## Sheet: Mt Wilhelm 700m
					Key to the code	MAL: Malaise - MW: Mount Wilhelm, 0700: elevation (m), A: plot - xx/16: day xx/16 - dxx: day xx
MNHN Voucher	Taxa	Species	abundance	Site	Method	Short sample code	Val number	Altitude (m)	detailed sample code
TZ00001	Cicadellidae	Sp337	1	Mt Wilhelm	Malaise	P1388	5868	700	MAL-MW0700A-01/16-d01
TZ00002	Cicadellidae	Sp444	4	Mt Wilhelm	Malaise	P1388	5868	700	MAL-MW0700A-01/16-d01
TZ00003	Cicadellidae	Sp460	1	Mt Wilhelm	Malaise	P1388	5868	700	MAL-MW0700A-01/16-d01
TZ00004	Derbidae	Sp143	1	Mt Wilhelm	Malaise	P1388	5868	700	MAL-MW0700A-01/16-d01
TZ00005	Derbidae	Sp461	1	Mt Wilhelm	Malaise	P1388	5868	700	MAL-MW0700A-01/16-d01
TZ00006	Cicadellidae	Sp337	4	Mt Wilhelm	Malaise	P1389	5847	700	MAL-MW0700A-02/16-d02
TZ00007	Cicadellidae	Sp400	1	Mt Wilhelm	Malaise	P1389	5847	700	MAL-MW0700A-02/16-d02
TZ00008	Cicadellidae	Sp462	1	Mt Wilhelm	Malaise	P1389	5847	700	MAL-MW0700A-02/16-d02
TZ00009	Cicadellidae	Sp463	1	Mt Wilhelm	Malaise	P1389	5847	700	MAL-MW0700A-02/16-d02
TZ00010	Derbidae	Sp464	1	Mt Wilhelm	Malaise	P1389	5847	700	MAL-MW0700A-02/16-d02
TZ00011	Derbidae	Sp223	1	Mt Wilhelm	Malaise	P1389	5847	700	MAL-MW0700A-02/16-d02
TZ00012	Cicadellidae	Sp444	6	Mt Wilhelm	Malaise	P1390	5875	700	MAL-MW0700A-03/16-d03
TZ00013	Cicadellidae	Sp465	1	Mt Wilhelm	Malaise	P1390	5875	700	MAL-MW0700A-03/16-d03
TZ00014	Derbidae	Sp466	1	Mt Wilhelm	Malaise	P1390	5875	700	MAL-MW0700A-03/16-d03
TZ00015	Cicadellidae	Sp444	3	Mt Wilhelm	Malaise	P1391	5843	700	MAL-MW0700A-04/16-d04
TZ00016	Derbidae	Sp467	1	Mt Wilhelm	Malaise	P1391	5843	700	MAL-MW0700A-04/16-d04
TZ00017	Cicadellidae	Sp444	4	Mt Wilhelm	Malaise	P1392	5867	700	MAL-MW0700A-05/15-d05
TZ00018	Cicadellidae	Sp468	1	Mt Wilhelm	Malaise	P1392	5867	700	MAL-MW0700A-05/15-d05
TZ00019	Cixiidae	Sp469	1	Mt Wilhelm	Malaise	P1392	5867	700	MAL-MW0700A-05/15-d05
TZ00020	Cixiidae	Sp470	1	Mt Wilhelm	Malaise	P1392	5867	700	MAL-MW0700A-05/15-d05
TZ00021	Cicadellidae	Sp444	3	Mt Wilhelm	Malaise	P1394	5846	700	MAL-MW0700A-07/16-d07
TZ00022	Fulgoromorpha (larve)	Sp421	1	Mt Wilhelm	Malaise	P1394	5846	700	MAL-MW0700A-07/16-d07
TZ00023	Derbidae	Sp143	1	Mt Wilhelm	Malaise	P1394	5846	700	MAL-MW0700A-07/16-d07
TZ00024	Meenoplidae	Sp471	1	Mt Wilhelm	Malaise	P1394	5846	700	MAL-MW0700A-07/16-d07
TZ00025	Delphacidae	Sp472	1	Mt Wilhelm	Malaise	P1394	5846	700	MAL-MW0700A-07/16-d07
TZ00026	Cicadellidae	Sp444	5	Mt Wilhelm	Malaise	P1395	5864	700	MAL-MW0700A-08/16-d08
TZ00027	Cicadellidae	Sp473	1	Mt Wilhelm	Malaise	P1395	5864	700	MAL-MW0700A-08/16-d08
TZ00028	Cicadellidae	Sp384	1	Mt Wilhelm	Malaise	P1395	5864	700	MAL-MW0700A-08/16-d08
TZ00029	Heteroptera	Sp474	1	Mt Wilhelm	Malaise	P1395	5864	700	MAL-MW0700A-08/16-d08
TZ00030	Heteroptera	Sp475	1	Mt Wilhelm	Malaise	P1395	5864	700	MAL-MW0700A-08/16-d08
TZ00031	Cicadellidae	Sp337	2	Mt Wilhelm	Malaise	P1396	5836	700	MAL-MW0700A-09/16-d09
TZ00032	Cicadellidae	Sp444	1	Mt Wilhelm	Malaise	P1396	5836	700	MAL-MW0700A-09/16-d09
TZ00033	Derbidae	Sp476	1	Mt Wilhelm	Malaise	P1396	5836	700	MAL-MW0700A-09/16-d09
TZ00034	Cicadellidae	Sp477	1	Mt Wilhelm	Malaise	P1396	5836	700	MAL-MW0700A-09/16-d09
TZ00035	Cicadellidae	Sp444	2	Mt Wilhelm	Malaise	P1397	5850	700	MAL-MW0700A-10/16-d10
TZ00036	Cicadellidae	Sp41	1	Mt Wilhelm	Malaise	P1397	5850	700	MAL-MW0700A-10/16-d10
TZ00037	Cicadellidae	Sp478	1	Mt Wilhelm	Malaise	P1397	5850	700	MAL-MW0700A-10/16-d10
TZ00038	Cicadellidae	Sp479	1	Mt Wilhelm	Malaise	P1397	5850	700	MAL-MW0700A-10/16-d10
TZ00039	Cixiidae	Sp480	1	Mt Wilhelm	Malaise	P1397	5850	700	MAL-MW0700A-10/16-d10
TZ00040	Cicadellidae	Sp337	1	Mt Wilhelm	Malaise	P1398	9645	700	MAL-MW0700A-11/16-d11
TZ00041	Cicadellidae	Sp481	1	Mt Wilhelm	Malaise	P1398	9645	700	MAL-MW0700A-11/16-d11
TZ00042	Meenoplidae	Sp471	1	Mt Wilhelm	Malaise	P1398	9645	700	MAL-MW0700A-11/16-d11
TZ00043	Cicadellidae	Sp444	1	Mt Wilhelm	Malaise	P1399	9727	700	MAL-MW0700A-12/16-d12
TZ00044	Cicadellidae	Sp482	1	Mt Wilhelm	Malaise	P1399	9727	700	MAL-MW0700A-12/16-d12
TZ00045	Fulgoromorpha (larve)	Sp483	1	Mt Wilhelm	Malaise	P1399	9727	700	MAL-MW0700A-12/16-d12
TZ00046	Cicadellidae	Sp444	3	Mt Wilhelm	Malaise	P1400	9728	700	MAL-MW0700A-13/16-d13
TZ00047	Cicadellidae	Sp484	1	Mt Wilhelm	Malaise	P1400	9728	700	MAL-MW0700A-13/16-d13
TZ00048	Cicadellidae	Sp444	3	Mt Wilhelm	Malaise	P1401	9736	700	MAL-MW0700A-14/16-d14
TZ00049	Cicadellidae	Sp465	1	Mt Wilhelm	Malaise	P1401	9736	700	MAL-MW0700A-14/16-d14
TZ00050	Cicadellidae	Sp444	4	Mt Wilhelm	Malaise	P1402	9724	700	MAL-MW0700A-15/16-d15
TZ00051	Cicadellidae	Sp485	1	Mt Wilhelm	Malaise	P1402	9724	700	MAL-MW0700A-15/16-d15
TZ00052	Cicadellidae	Sp486	1	Mt Wilhelm	Malaise	P1403	9712	700	MAL-MW0700A-16/16-d16
TZ00053	Cicadellidae	Sp444	8	Mt Wilhelm	Malaise	P1405	5841	700	MAL-MW0700B-02/16-d02
TZ00054	Cicadellidae	Sp337	1	Mt Wilhelm	Malaise	P1405	5841	700	MAL-MW0700B-02/16-d02
TZ00055	Cicadellidae	Sp487	2	Mt Wilhelm	Malaise	P1405	5841	700	MAL-MW0700B-02/16-d02
TZ00056	Cicadellidae	Sp487	4	Mt Wilhelm	Malaise	P1406	5860	700	MAL-MW0700B-03/16-d03
TZ00057	Cicadellidae	Sp488	5	Mt Wilhelm	Malaise	P1406	5860	700	MAL-MW0700B-03/16-d03
TZ00058	Cicadellidae	Sp489	1	Mt Wilhelm	Malaise	P1406	5860	700	MAL-MW0700B-03/16-d03
TZ00059	Cicadellidae	Sp444	1	Mt Wilhelm	Malaise	P1406	5860	700	MAL-MW0700B-03/16-d03
TZ00060	Cicadellidae	Sp490	1	Mt Wilhelm	Malaise	P1406	5860	700	MAL-MW0700B-03/16-d03
TZ00061	Cicadellidae	Sp491	3	Mt Wilhelm	Malaise	P1406	5860	700	MAL-MW0700B-03/16-d03
TZ00062	Cicadellidae	Sp492	1	Mt Wilhelm	Malaise	P1406	5860	700	MAL-MW0700B-03/16-d03
TZ00063	Cicadellidae	Sp493	1	Mt Wilhelm	Malaise	P1406	5860	700	MAL-MW0700B-03/16-d03
TZ00064	Cixiidae	Sp494	1	Mt Wilhelm	Malaise	P1406	5860	700	MAL-MW0700B-03/16-d03
TZ00065	Cercopidae	Sp495	1	Mt Wilhelm	Malaise	P1406	5860	700	MAL-MW0700B-03/16-d03
TZ00066	Cicadellidae	Sp337	1	Mt Wilhelm	Malaise	P1407	5851	700	MAL-MW0700B-04/16-d16
TZ00067	Heteroptera	Sp475	1	Mt Wilhelm	Malaise	P1407	5851	700	MAL-MW0700B-04/16-d16
TZ00068	Cicadellidae	Sp444	3	Mt Wilhelm	Malaise	P1407	5851	700	MAL-MW0700B-04/16-d16
TZ00069	Cicadellidae	Sp487	3	Mt Wilhelm	Malaise	P1407	5851	700	MAL-MW0700B-04/16-d16
TZ00070	Delphacidae	Sp496	1	Mt Wilhelm	Malaise	P1407	5851	700	MAL-MW0700B-04/16-d16
TZ00071	Cicadellidae	Sp337	3	Mt Wilhelm	Malaise	P1408	9709	700	MAL-MW0700B-05/16-d05
TZ00072	Cicadellidae	Sp444	15	Mt Wilhelm	Malaise	P1408	9709	700	MAL-MW0700B-05/16-d05
TZ00073	Cicadellidae	Sp487	3	Mt Wilhelm	Malaise	P1408	9709	700	MAL-MW0700B-05/16-d05
TZ00074	Cicadellidae	Sp497	1	Mt Wilhelm	Malaise	P1408	9709	700	MAL-MW0700B-05/16-d05
TZ00075	Cicadellidae	Sp498	2	Mt Wilhelm	Malaise	P1408	9709	700	MAL-MW0700B-05/16-d05
TZ00076	Heteroptera	Sp499	1	Mt Wilhelm	Malaise	P1408	9709	700	MAL-MW0700B-05/16-d05
TZ00077	Derbidae	Sp500	1	Mt Wilhelm	Malaise	P1408	9709	700	MAL-MW0700B-05/16-d05
TZ00078	Cicadellidae	Sp501	3	Mt Wilhelm	Malaise	P1408	9709	700	MAL-MW0700B-05/16-d05
TZ00079	Cicadellidae	Sp502	1	Mt Wilhelm	Malaise	P1408	9709	700	MAL-MW0700B-05/16-d05
TZ00080	Cicadellidae	Sp337	2	Mt Wilhelm	Malaise	P1409	5849	700	MAL-MW0700B-06/16-d06
TZ00081	Cicadellidae	Sp444	5	Mt Wilhelm	Malaise	P1409	5849	700	MAL-MW0700B-06/16-d06
TZ00082	Cicadellidae	Sp487	1	Mt Wilhelm	Malaise	P1409	5849	700	MAL-MW0700B-06/16-d06
TZ00083	Cicadellidae	Sp503	1	Mt Wilhelm	Malaise	P1409	5849	700	MAL-MW0700B-06/16-d06
TZ00084	Cicadellidae	Sp504	1	Mt Wilhelm	Malaise	P1409	5849	700	MAL-MW0700B-06/16-d06
TZ00085	Heteroptera	Sp431	1	Mt Wilhelm	Malaise	P1410	5845	700	MAL-MW0700B-07/16-d07
TZ00086	Cicadellidae	Sp501	1	Mt Wilhelm	Malaise	P1410	5845	700	MAL-MW0700B-07/16-d07
TZ00087	Cicadellidae	Sp444	8	Mt Wilhelm	Malaise	P1410	5845	700	MAL-MW0700B-07/16-d07
TZ00088	Cicadellidae	Sp487	1	Mt Wilhelm	Malaise	P1410	5845	700	MAL-MW0700B-07/16-d07
TZ00089	Cicadellidae	Sp505	2	Mt Wilhelm	Malaise	P1410	5845	700	MAL-MW0700B-07/16-d07
TZ00090	Cicadellidae	Sp465	1	Mt Wilhelm	Malaise	P1411	5866	700	MAL-MW0700B-08/16-d08
TZ00091	Cicadellidae	Sp487	5	Mt Wilhelm	Malaise	P1411	5866	700	MAL-MW0700B-08/16-d08
TZ00092	Cicadellidae	Sp444	1	Mt Wilhelm	Malaise	P1411	5866	700	MAL-MW0700B-08/16-d08
TZ00093	Cicadellidae	Sp491	1	Mt Wilhelm	Malaise	P1411	5866	700	MAL-MW0700B-08/16-d08
TZ00094	Cicadellidae	Sp506	1	Mt Wilhelm	Malaise	P1411	5866	700	MAL-MW0700B-08/16-d08
TZ00095	Flatidae	Sp507	1	Mt Wilhelm	Malaise	P1412	5858	700	MAL-MW0700B-09/16-d09
TZ00096	Heteroptera	Sp353	1	Mt Wilhelm	Malaise	P1412	5858	700	MAL-MW0700B-09/16-d09
TZ00097	Cixiidae	Sp494	1	Mt Wilhelm	Malaise	P1412	5858	700	MAL-MW0700B-09/16-d09
TZ00098	Derbidae	Sp508	1	Mt Wilhelm	Malaise	P1412	5858	700	MAL-MW0700B-09/16-d09
TZ00099	Cicadellidae	Sp505	2	Mt Wilhelm	Malaise	P1412	5858	700	MAL-MW0700B-09/16-d09
TZ00100	Cicadellidae	Sp444	2	Mt Wilhelm	Malaise	P1412	5858	700	MAL-MW0700B-09/16-d09
TZ00101	Cicadellidae	Sp487	4	Mt Wilhelm	Malaise	P1412	5858	700	MAL-MW0700B-09/16-d09
TZ00102	Cicadellidae	Sp501	1	Mt Wilhelm	Malaise	P1412	5858	700	MAL-MW0700B-09/16-d09
TZ00103	Cicadellidae	Sp509	1	Mt Wilhelm	Malaise	P1412	5858	700	MAL-MW0700B-09/16-d09
TZ00104	Cicadellidae	Sp510	1	Mt Wilhelm	Malaise	P1412	5858	700	MAL-MW0700B-09/16-d09
TZ00105	Cicadellidae	Sp511	1	Mt Wilhelm	Malaise	P1412	5858	700	MAL-MW0700B-09/16-d09
TZ00106	Cicadellidae	Sp512	1	Mt Wilhelm	Malaise	P1412	5858	700	MAL-MW0700B-09/16-d09
TZ00107	Cicadellidae	Sp513	1	Mt Wilhelm	Malaise	P1412	5858	700	MAL-MW0700B-09/16-d09
TZ00108	Cicadellidae	Sp514	1	Mt Wilhelm	Malaise	P1412	5858	700	MAL-MW0700B-09/16-d09
TZ00109	Cicadellidae	Sp502	3	Mt Wilhelm	Malaise	P1412	5858	700	MAL-MW0700B-09/16-d09
TZ00110	Cicadellidae	Sp444	4	Mt Wilhelm	Malaise	P1413	5869	700	MAL-MW0700B-10/16-d10
TZ00111	Cicadellidae	Sp487	1	Mt Wilhelm	Malaise	P1413	5869	700	MAL-MW0700B-10/16-d10
TZ00112	Cicadellidae	Sp444	1	Mt Wilhelm	Malaise	P1414	5872	700	MAL-MW0700B-11/16-d11
TZ00113	Cicadellidae	Sp505	1	Mt Wilhelm	Malaise	P1414	5872	700	MAL-MW0700B-11/16-d11
TZ00114	Cicadellidae	Sp498	1	Mt Wilhelm	Malaise	P1414	5872	700	MAL-MW0700B-11/16-d11
TZ00115	Cicadellidae	Sp506	1	Mt Wilhelm	Malaise	P1414	5872	700	MAL-MW0700B-11/16-d11
TZ00116	Cicadellidae	Sp515	1	Mt Wilhelm	Malaise	P1414	5872	700	MAL-MW0700B-11/16-d11
TZ00117	Cicadellidae	Sp509	1	Mt Wilhelm	Malaise	P1414	5872	700	MAL-MW0700B-11/16-d11
TZ00118	Cicadellidae	Sp503	1	Mt Wilhelm	Malaise	P1414	5872	700	MAL-MW0700B-11/16-d11
TZ00119	Cicadellidae	Sp490	1	Mt Wilhelm	Malaise	P1414	5872	700	MAL-MW0700B-11/16-d11
TZ00120	Cicadellidae	Sp516	1	Mt Wilhelm	Malaise	P1414	5872	700	MAL-MW0700B-11/16-d11
TZ00121	Cicadellidae	Sp517	1	Mt Wilhelm	Malaise	P1414	5872	700	MAL-MW0700B-11/16-d11
TZ00122	Cicadellidae	Sp518	11	Mt Wilhelm	Malaise	P1414	5872	700	MAL-MW0700B-11/16-d11
TZ00123	Cicadellidae	Sp444	4	Mt Wilhelm	Malaise	P1416	9716	700	MAL-MW0700B-13/16-d13
TZ00124	Cicadellidae	Sp337	1	Mt Wilhelm	Malaise	P1416	9716	700	MAL-MW0700B-13/16-d13
TZ00125	Cicadellidae	Sp465	1	Mt Wilhelm	Malaise	P1416	9716	700	MAL-MW0700B-13/16-d13
TZ00126	Cicadellidae	Sp487	1	Mt Wilhelm	Malaise	P1416	9716	700	MAL-MW0700B-13/16-d13
TZ00127	Cicadellidae	Sp509	1	Mt Wilhelm	Malaise	P1416	9716	700	MAL-MW0700B-13/16-d13
TZ00128	Cicadellidae	Sp519	1	Mt Wilhelm	Malaise	P1416	9716	700	MAL-MW0700B-13/16-d13
TZ00129	Cicadellidae	Sp502	1	Mt Wilhelm	Malaise	P1416	9716	700	MAL-MW0700B-13/16-d13
TZ00130	Cicadellidae	Sp520	1	Mt Wilhelm	Malaise	P1416	9716	700	MAL-MW0700B-13/16-d13
TZ00131	Heteroptera	Sp521	1	Mt Wilhelm	Malaise	P1417	9726	700	MAL-MW0700B-14/16-d14
TZ00132	Cicadellidae	Sp337	1	Mt Wilhelm	Malaise	P1417	9726	700	MAL-MW0700B-14/16-d14
TZ00133	Cicadellidae	Sp505	3	Mt Wilhelm	Malaise	P1417	9726	700	MAL-MW0700B-14/16-d14
TZ00134	Cicadellidae	Sp32	1	Mt Wilhelm	Malaise	P1417	9726	700	MAL-MW0700B-14/16-d14
TZ00135	Cicadellidae	Sp512	1	Mt Wilhelm	Malaise	P1417	9726	700	MAL-MW0700B-14/16-d14
TZ00136	Cicadellidae	Sp522	1	Mt Wilhelm	Malaise	P1417	9726	700	MAL-MW0700B-14/16-d14
TZ00137	Cicadellidae	Sp487	5	Mt Wilhelm	Malaise	P1417	9726	700	MAL-MW0700B-14/16-d14
TZ00138	Cicadellidae	Sp444	25	Mt Wilhelm	Malaise	P1417	9726	700	MAL-MW0700B-14/16-d14
TZ00139	Cicadellidae	Sp444	7	Mt Wilhelm	Malaise	P1418	9731	700	MAL-MW0700B-15/16-d15
TZ00140	Cicadellidae	Sp487	3	Mt Wilhelm	Malaise	P1418	9731	700	MAL-MW0700B-15/16-d15
TZ00141	Cicadellidae	Sp337	1	Mt Wilhelm	Malaise	P1418	9731	700	MAL-MW0700B-15/16-d15
TZ00142	Cicadellidae	Sp505	1	Mt Wilhelm	Malaise	P1418	9731	700	MAL-MW0700B-15/16-d15
TZ00143	Cicadellidae	Sp523	1	Mt Wilhelm	Malaise	P1418	9731	700	MAL-MW0700B-15/16-d15
TZ00144	Heteroptera	Sp521	1	Mt Wilhelm	Malaise	P1419	9713	700	MAL-MW0700B-16/16-d16
TZ00145	Heteroptera	Sp499	1	Mt Wilhelm	Malaise	P1419	9713	700	MAL-MW0700B-16/16-d16
TZ00146	Heteroptera	Sp524	1	Mt Wilhelm	Malaise	P1419	9713	700	MAL-MW0700B-16/16-d16
TZ00147	Fulgoromorpha (larve)	Sp525	1	Mt Wilhelm	Malaise	P1419	9713	700	MAL-MW0700B-16/16-d16
TZ00148	Cicadellidae	Sp444	4	Mt Wilhelm	Malaise	P1419	9713	700	MAL-MW0700B-16/16-d16
TZ00149	Cicadellidae	Sp487	2	Mt Wilhelm	Malaise	P1419	9713	700	MAL-MW0700B-16/16-d16
TZ00150	Cicadellidae	Sp505	2	Mt Wilhelm	Malaise	P1419	9713	700	MAL-MW0700B-16/16-d16
TZ00151	Cicadellidae	Sp444	1	Mt Wilhelm	Malaise	P1420	5709	700	MAL-MW0700C-01/16-d01
TZ00152	Cicadellidae	Sp465	1	Mt Wilhelm	Malaise	P1421	5837	700	MAL-MW0700C-02/16-d02
TZ00153	Cixiidae	Sp494	1	Mt Wilhelm	Malaise	P1421	5837	700	MAL-MW0700C-02/16-d02
TZ00154	Cicadellidae	Sp444	3	Mt Wilhelm	Malaise	P1422	5862	700	MAL-MW0700C-03/16-d03
TZ00155	Cicadellidae	Sp487	3	Mt Wilhelm	Malaise	P1422	5862	700	MAL-MW0700C-03/16-d03
TZ00156	Cicadellidae	Sp337	1	Mt Wilhelm	Malaise	P1422	5862	700	MAL-MW0700C-03/16-d03
TZ00157	Cicadellidae	Sp491	1	Mt Wilhelm	Malaise	P1422	5862	700	MAL-MW0700C-03/16-d03
TZ00158	Cixiidae	Sp526	1	Mt Wilhelm	Malaise	P1422	5862	700	MAL-MW0700C-03/16-d03
TZ00159	Cicadellidae	Sp29	1	Mt Wilhelm	Malaise	P1423	5854	700	MAL-MW0700C-04/16-d04
TZ00160	Cicadellidae	Sp337	1	Mt Wilhelm	Malaise	P1423	5854	700	MAL-MW0700C-04/16-d04
TZ00161	Cicadellidae	Sp444	2	Mt Wilhelm	Malaise	P1423	5854	700	MAL-MW0700C-04/16-d04
TZ00162	Cicadellidae	Sp527	1	Mt Wilhelm	Malaise	P1423	5854	700	MAL-MW0700C-04/16-d04
TZ00163	Cicadellidae	Sp528	1	Mt Wilhelm	Malaise	P1423	5854	700	MAL-MW0700C-04/16-d04
TZ00164	Cicadellidae	Sp529	1	Mt Wilhelm	Malaise	P1423	5854	700	MAL-MW0700C-04/16-d04
TZ00165	Cixiidae	Sp530	1	Mt Wilhelm	Malaise	P1423	5854	700	MAL-MW0700C-04/16-d04
TZ00166	Meenoplidae	Sp471	1	Mt Wilhelm	Malaise	P1423	5854	700	MAL-MW0700C-04/16-d04
TZ00167	Cicadellidae	Sp444	4	Mt Wilhelm	Malaise	P1424	9717	700	MAL-MW0700C-05/16-d05
TZ00168	Cicadellidae	Sp505	2	Mt Wilhelm	Malaise	P1424	9717	700	MAL-MW0700C-05/16-d05
TZ00169	Cicadellidae	Sp463	1	Mt Wilhelm	Malaise	P1424	9717	700	MAL-MW0700C-05/16-d05
TZ00170	Cicadellidae	Sp45	1	Mt Wilhelm	Malaise	P1424	9717	700	MAL-MW0700C-05/16-d05
TZ00171	Cixiidae	Sp530	1	Mt Wilhelm	Malaise	P1425	5839	700	MAL-MW0700C-06/16-d06
TZ00172	Cicadellidae	Sp491	1	Mt Wilhelm	Malaise	P1425	5839	700	MAL-MW0700C-06/16-d06
TZ00173	Cicadellidae	Sp444	1	Mt Wilhelm	Malaise	P1425	5839	700	MAL-MW0700C-06/16-d06
TZ00174	Cicadellidae	Sp531	2	Mt Wilhelm	Malaise	P1425	5839	700	MAL-MW0700C-06/16-d06
TZ00175	Cicadellidae	Sp532	1	Mt Wilhelm	Malaise	P1425	5839	700	MAL-MW0700C-06/16-d06
TZ00176	Cicadellidae	Sp444	3	Mt Wilhelm	Malaise	P1426	5871	700	MAL-MW0700C-07/16-d07
TZ00177	Cicadellidae	Sp337	1	Mt Wilhelm	Malaise	P1426	5871	700	MAL-MW0700C-07/16-d07
TZ00178	Cicadellidae	Sp487	1	Mt Wilhelm	Malaise	P1426	5871	700	MAL-MW0700C-07/16-d07
TZ00179	Cicadellidae	Sp463	1	Mt Wilhelm	Malaise	P1426	5871	700	MAL-MW0700C-07/16-d07
TZ00180	Cicadellidae	Sp534	1	Mt Wilhelm	Malaise	P1426	5871	700	MAL-MW0700C-07/16-d07
TZ00181	Cicadellidae	Sp535	1	Mt Wilhelm	Malaise	P1426	5871	700	MAL-MW0700C-07/16-d07
TZ00182	Heteroptera	Sp474	1	Mt Wilhelm	Malaise	P1427	5857	700	MAL-MW0700C-08/16-d08
TZ00183	Heteroptera	Sp431	1	Mt Wilhelm	Malaise	P1427	5857	700	MAL-MW0700C-08/16-d08
TZ00184	Cixiidae	Sp530	1	Mt Wilhelm	Malaise	P1427	5857	700	MAL-MW0700C-08/16-d08
TZ00185	Cicadellidae	Sp444	4	Mt Wilhelm	Malaise	P1428	5863	700	MAL-MW0700C-09/16-d09
TZ00186	Cicadellidae	Sp487	2	Mt Wilhelm	Malaise	P1428	5863	700	MAL-MW0700C-09/16-d09
TZ00187	Heteroptera	Sp475	1	Mt Wilhelm	Malaise	P1428	5863	700	MAL-MW0700C-09/16-d09
TZ00188	Delphacidae	Sp536	1	Mt Wilhelm	Malaise	P1428	5863	700	MAL-MW0700C-09/16-d09
TZ00189	Cicadellidae	Sp337	1	Mt Wilhelm	Malaise	P1429	5870	700	MAL-MW0700C-10/16-d10
TZ00190	Cicadellidae	Sp537	1	Mt Wilhelm	Malaise	P1429	5870	700	MAL-MW0700C-10/16-d10
TZ00191	Cicadellidae	Sp538	1	Mt Wilhelm	Malaise	P1429	5870	700	MAL-MW0700C-10/16-d10
TZ00192	Cicadellidae	Sp41	1	Mt Wilhelm	Malaise	P1429	5870	700	MAL-MW0700C-10/16-d10
TZ00193	Cicadellidae	Sp502	1	Mt Wilhelm	Malaise	P1429	5870	700	MAL-MW0700C-10/16-d10
TZ00194	Cicadellidae	Sp539	1	Mt Wilhelm	Malaise	P1429	5870	700	MAL-MW0700C-10/16-d10
TZ00195	Cicadellidae	Sp540	2	Mt Wilhelm	Malaise	P1429	5870	700	MAL-MW0700C-10/16-d10
TZ00196	Fulgoromorpha (larve)	Sp541	1	Mt Wilhelm	Malaise	P1429	5870	700	MAL-MW0700C-10/16-d10
TZ00197	Cicadellidae	Sp444	4	Mt Wilhelm	Malaise	P1430	5856	700	MAL-MW0700C-11/16-d11
TZ00198	Cicadellidae	Sp337	1	Mt Wilhelm	Malaise	P1430	5856	700	MAL-MW0700C-11/16-d11
TZ00199	Cicadellidae	Sp531	3	Mt Wilhelm	Malaise	P1431	9733	700	MAL-MW0700C-12/16-d12
TZ00200	Cicadellidae	Sp465	1	Mt Wilhelm	Malaise	P1431	9733	700	MAL-MW0700C-12/16-d12
TZ00201	Cicadellidae	Sp444	5	Mt Wilhelm	Malaise	P1432	9718	700	MAL-MW0700C-13/16-d13
TZ00202	Cicadellidae	Sp512	1	Mt Wilhelm	Malaise	P1432	9718	700	MAL-MW0700C-13/16-d13
TZ00203	Cicadellidae	Sp465	1	Mt Wilhelm	Malaise	P1433	9701	700	MAL-MW0700C-14/16-d14
TZ00204	Cicadellidae	Sp463	2	Mt Wilhelm	Malaise	P1433	9701	700	MAL-MW0700C-14/16-d14
TZ00205	Cicadellidae	Sp411	1	Mt Wilhelm	Malaise	P1433	9701	700	MAL-MW0700C-14/16-d14
TZ00206	Cicadellidae	Sp542	2	Mt Wilhelm	Malaise	P1433	9701	700	MAL-MW0700C-14/16-d14
TZ00207	Cicadellidae	Sp543	1	Mt Wilhelm	Malaise	P1433	9701	700	MAL-MW0700C-14/16-d14
TZ00208	Fulgoromorpha (larve)	Sp544	1	Mt Wilhelm	Malaise	P1433	9701	700	MAL-MW0700C-14/16-d14
TZ00209	Aleyrodidae	Sp545	1	Mt Wilhelm	Malaise	P1433	9701	700	MAL-MW0700C-14/16-d14
TZ00210	Cicadellidae	Sp546	1	Mt Wilhelm	Malaise	P1433	9701	700	MAL-MW0700C-14/16-d14
TZ00211	Cicadellidae	Sp444	3	Mt Wilhelm	Malaise	P1434	9706	700	MAL-MW0700C-15/16-d15
TZ00212	Cicadellidae	Sp444	1	Mt Wilhelm	Malaise	P1435	9721	700	MAL-MW0700C-16/16-d16
TZ00213	Cicadellidae	Sp542	1	Mt Wilhelm	Malaise	P1435	9721	700	MAL-MW0700C-16/16-d16
TZ00214	Cicadellidae	Sp528	1	Mt Wilhelm	Malaise	P1435	9721	700	MAL-MW0700C-16/16-d16
TZ00215	Cicadellidae	Sp527	1	Mt Wilhelm	Malaise	P1435	9721	700	MAL-MW0700C-16/16-d16
TZ00216	Derbidae	Sp547	1	Mt Wilhelm	Malaise	P1435	9721	700	MAL-MW0700C-16/16-d16
TZ00217	Cicadellidae	Sp491	1	Mt Wilhelm	Malaise	P1436	5842	700	MAL-MW0700D-01/16-d01
TZ00218	Cicadellidae	Sp527	2	Mt Wilhelm	Malaise	P1436	5842	700	MAL-MW0700D-01/16-d01
TZ00219	Cicadellidae	Sp32	1	Mt Wilhelm	Malaise	P1436	5842	700	MAL-MW0700D-01/16-d01
TZ00220	Cicadellidae	Sp542	1	Mt Wilhelm	Malaise	P1436	5842	700	MAL-MW0700D-01/16-d01
TZ00221	Cicadellidae	Sp548	1	Mt Wilhelm	Malaise	P1436	5842	700	MAL-MW0700D-01/16-d01
TZ00222	Flatidae	Sp549	1	Mt Wilhelm	Malaise	P1437	5852	700	MAL-MW0700D-02/16-d02
TZ00223	Derbidae	Sp550	1	Mt Wilhelm	Malaise	P1437	5852	700	MAL-MW0700D-02/16-d02
TZ00224	Cicadellidae	Sp337	1	Mt Wilhelm	Malaise	P1437	5852	700	MAL-MW0700D-02/16-d02
TZ00225	Cicadellidae	Sp444	6	Mt Wilhelm	Malaise	P1437	5852	700	MAL-MW0700D-02/16-d02
TZ00226	Cicadellidae	Sp487	3	Mt Wilhelm	Malaise	P1437	5852	700	MAL-MW0700D-02/16-d02
TZ00227	Cicadellidae	Sp542	1	Mt Wilhelm	Malaise	P1438	5874	700	MAL-MW0700D-03/16-d03
TZ00228	Derbidae	Sp551	1	Mt Wilhelm	Malaise	P1438	5874	700	MAL-MW0700D-03/16-d03
TZ00229	Cicadellidae	Sp498	3	Mt Wilhelm	Malaise	P1439	5840	700	MAL-MW0700D-04/16-d04
TZ00230	Cicadellidae	Sp401	1	Mt Wilhelm	Malaise	P1439	5840	700	MAL-MW0700D-04/16-d04
TZ00231	Cicadellidae	Sp515	1	Mt Wilhelm	Malaise	P1439	5840	700	MAL-MW0700D-04/16-d04
TZ00232	Cicadellidae	Sp444	4	Mt Wilhelm	Malaise	P1439	5840	700	MAL-MW0700D-04/16-d04
TZ00233	Cicadellidae	Sp505	3	Mt Wilhelm	Malaise	P1439	5840	700	MAL-MW0700D-04/16-d04
TZ00234	Cicadellidae	Sp552	1	Mt Wilhelm	Malaise	P1439	5840	700	MAL-MW0700D-04/16-d04
TZ00235	Derbidae	Sp553	1	Mt Wilhelm	Malaise	P1439	5840	700	MAL-MW0700D-04/16-d04
TZ00236	Cicadellidae	Sp518	9	Mt Wilhelm	Malaise	P1439	5840	700	MAL-MW0700D-04/16-d04
TZ00237	Cicadellidae	Sp501	3	Mt Wilhelm	Malaise	P1439	5840	700	MAL-MW0700D-04/16-d04
TZ00238	Cicadellidae	Sp465	1	Mt Wilhelm	Malaise	P1440	5859	700	MAL-MW0700D-05/16-d05
TZ00239	Cicadellidae	Sp542	3	Mt Wilhelm	Malaise	P1440	5859	700	MAL-MW0700D-05/16-d05
TZ00240	Cicadellidae	Sp444	2	Mt Wilhelm	Malaise	P1440	5859	700	MAL-MW0700D-05/16-d05
TZ00241	Cicadellidae	Sp478	1	Mt Wilhelm	Malaise	P1440	5859	700	MAL-MW0700D-05/16-d05
TZ00242	Cicadellidae	Sp538	1	Mt Wilhelm	Malaise	P1440	5859	700	MAL-MW0700D-05/16-d05
TZ00243	Cicadellidae	SP512	1	Mt Wilhelm	Malaise	P1440	5859	700	MAL-MW0700D-05/16-d05
TZ00244	Cicadellidae	Sp506	2	Mt Wilhelm	Malaise	P1441	5873	700	MAL-MW0700D-06/16-d06
TZ00245	Cicadellidae	Sp518	2	Mt Wilhelm	Malaise	P1441	5873	700	MAL-MW0700D-06/16-d06
TZ00246	Cicadellidae	Sp491	1	Mt Wilhelm	Malaise	P1441	5873	700	MAL-MW0700D-06/16-d06
TZ00247	Cicadellidae	Sp554	1	Mt Wilhelm	Malaise	P1441	5873	700	MAL-MW0700D-06/16-d06
TZ00248	Cicadellidae	Sp556	1	Mt Wilhelm	Malaise	P1441	5873	700	MAL-MW0700D-06/16-d06
TZ00249	Cicadellidae	Sp555	1	Mt Wilhelm	Malaise	P1441	5873	700	MAL-MW0700D-06/16-d06
TZ00250	Cicadellidae	Sp444	8	Mt Wilhelm	Malaise	P1441	5873	700	MAL-MW0700D-06/16-d06
TZ00251	Cicadellidae	Sp487	5	Mt Wilhelm	Malaise	P1441	5873	700	MAL-MW0700D-06/16-d06
TZ00252	Cicadellidae	Sp45	1	Mt Wilhelm	Malaise	P1442	5853	700	MAL-MW0700D-07/16-d07
TZ00253	Cicadellidae	Sp501	2	Mt Wilhelm	Malaise	P1442	5853	700	MAL-MW0700D-07/16-d07
TZ00254	Cicadellidae	Sp32	1	Mt Wilhelm	Malaise	P1442	5853	700	MAL-MW0700D-07/16-d07
TZ00255	Cicadellidae	Sp542	1	Mt Wilhelm	Malaise	P1442	5853	700	MAL-MW0700D-07/16-d07
TZ00256	Cicadellidae	Sp540	1	Mt Wilhelm	Malaise	P1442	5853	700	MAL-MW0700D-07/16-d07
TZ00257	Cicadellidae	Sp557	1	Mt Wilhelm	Malaise	P1442	5853	700	MAL-MW0700D-07/16-d07
TZ00258	Heteroptera	Sp558	1	Mt Wilhelm	Malaise	P1442	5853	700	MAL-MW0700D-07/16-d07
TZ00259	Derbidae	Sp559	1	Mt Wilhelm	Malaise	P1442	5853	700	MAL-MW0700D-07/16-d07
TZ00260	Cicadellidae	Sp537	1	Mt Wilhelm	Malaise	P1443	5838	700	MAL-MW0700D-08/16-d08
TZ00261	Cicadellidae	Sp560	1	Mt Wilhelm	Malaise	P1443	5838	700	MAL-MW0700D-08/16-d08
TZ00262	Cicadellidae	Sp465	1	Mt Wilhelm	Malaise	P1443	5838	700	MAL-MW0700D-08/16-d08
TZ00263	Cicadellidae	Sp505	2	Mt Wilhelm	Malaise	P1443	5838	700	MAL-MW0700D-08/16-d08
TZ00264	Cicadellidae	Sp487	2	Mt Wilhelm	Malaise	P1443	5838	700	MAL-MW0700D-08/16-d08
TZ00265	Cicadellidae	Sp444	10	Mt Wilhelm	Malaise	P1443	5838	700	MAL-MW0700D-08/16-d08
TZ00266	Heteroptera	Sp475	1	Mt Wilhelm	Malaise	P1443	5838	700	MAL-MW0700D-08/16-d08
TZ00267	Cixiidae	Sp561	1	Mt Wilhelm	Malaise	P1443	5838	700	MAL-MW0700D-08/16-d08
TZ00268	Bennaria damisa (Hoch, 2011)	Sp570	1	Mt Wilhelm	Malaise	P1443	5838	700	MAL-MW0700D-08/16-d08
TZ00269	Cicadellidae	Sp444	1	Mt Wilhelm	Malaise	P1444	9611	700	MAL-MW0700D-09/16-d09
TZ00270	Cicadellidae	Sp487	1	Mt Wilhelm	Malaise	P1444	9611	700	MAL-MW0700D-09/16-d09
TZ00271	Cicadellidae	Sp562	1	Mt Wilhelm	Malaise	P1444	9611	700	MAL-MW0700D-09/16-d09
TZ00272	Cixiidae	Sp563	1	Mt Wilhelm	Malaise	P1444	9611	700	MAL-MW0700D-09/16-d09
TZ00273	Cicadellidae	Sp29	1	Mt Wilhelm	Malaise	P1445	5861	700	MAL-MW0700D-10/16-d10
TZ00274	Cicadellidae	Sp487	2	Mt Wilhelm	Malaise	P1445	5861	700	MAL-MW0700D-10/16-d10
TZ00275	Cicadellidae	Sp444	11	Mt Wilhelm	Malaise	P1445	5861	700	MAL-MW0700D-10/16-d10
TZ00276	Derbidae	Sp508	1	Mt Wilhelm	Malaise	P1445	5861	700	MAL-MW0700D-10/16-d10
TZ00277	Derbidae	Sp564	1	Mt Wilhelm	Malaise	P1445	5861	700	MAL-MW0700D-10/16-d10
TZ00278	Derbidae	Sp565	1	Mt Wilhelm	Malaise	P1447	9691	700	MAL-MW0700D-12/16-d12
TZ00279	Cicadellidae	Sp501	1	Mt Wilhelm	Malaise	P1447	9691	700	MAL-MW0700D-12/16-d12
TZ00280	Cicadellidae	Sp518	1	Mt Wilhelm	Malaise	P1447	9691	700	MAL-MW0700D-12/16-d12
TZ00281	Cicadellidae	Sp527	1	Mt Wilhelm	Malaise	P1448	9746	700	MAL-MW0700D-13/16-d13
TZ00282	Cicadellidae	Sp542	1	Mt Wilhelm	Malaise	P1448	9746	700	MAL-MW0700D-13/16-d13
TZ00283	Cicadellidae	Sp444	1	Mt Wilhelm	Malaise	P1448	9746	700	MAL-MW0700D-13/16-d13
TZ00284	Cicadellidae	Sp487	1	Mt Wilhelm	Malaise	P1448	9746	700	MAL-MW0700D-13/16-d13
TZ00285	Cicadellidae	Sp540	1	Mt Wilhelm	Malaise	P1448	9746	700	MAL-MW0700D-13/16-d13
TZ00286	Cixiidae	Sp566	1	Mt Wilhelm	Malaise	P1448	9746	700	MAL-MW0700D-13/16-d13
TZ00287	Cicadellidae	Sp501	1	Mt Wilhelm	Malaise	P1449	9711	700	MAL-MW0700D-14/16-d14
TZ00288	Cicadellidae	Sp337	1	Mt Wilhelm	Malaise	P1449	9711	700	MAL-MW0700D-14/16-d14
TZ00289	Cicadellidae	Sp487	2	Mt Wilhelm	Malaise	P1449	9711	700	MAL-MW0700D-14/16-d14
TZ00290	Cicadellidae	Sp444	3	Mt Wilhelm	Malaise	P1449	9711	700	MAL-MW0700D-14/16-d14
TZ00291	Cicadellidae	Sp567	1	Mt Wilhelm	Malaise	P1449	9711	700	MAL-MW0700D-14/16-d14
TZ00292	Cicadellidae	Sp444	4	Mt Wilhelm	Malaise	P1450	9686	700	MAL-MW0700D-15/16-d15
TZ00293	Cicadellidae	Sp487	4	Mt Wilhelm	Malaise	P1450	9686	700	MAL-MW0700D-15/16-d15
TZ00294	Cicadellidae	Sp337	2	Mt Wilhelm	Malaise	P1450	9686	700	MAL-MW0700D-15/16-d15
TZ00295	Cicadellidae	Sp518	1	Mt Wilhelm	Malaise	P1450	9686	700	MAL-MW0700D-15/16-d15
TZ00296	Cicadellidae	Sp568	1	Mt Wilhelm	Malaise	P1450	9686	700	MAL-MW0700D-15/16-d15
TZ00297	Cicadellidae	Sp569	1	Mt Wilhelm	Malaise	P1450	9686	700	MAL-MW0700D-15/16-d15
TZ00298	Bennaria damisa (Hoch, 2011)	Sp570	1	Mt Wilhelm	Malaise	P1450	9686	700	MAL-MW0700D-15/16-d15
TZ00299	Cicadellidae	Sp444	2	Mt Wilhelm	Malaise	P1451	9741	700	MAL-MW0700D-16/16-d16
TZ00300	Cicadellidae	Sp487	3	Mt Wilhelm	Malaise	P1451	9741	700	MAL-MW0700D-16/16-d16
TZ00301	Cicadellidae	Sp337	1	Mt Wilhelm	Malaise	P1451	9741	700	MAL-MW0700D-16/16-d16
TZ00302	Cicadellidae	Sp501	1	Mt Wilhelm	Malaise	P1451	9741	700	MAL-MW0700D-16/16-d16
TZ00303	Cicadellidae	Sp518	1	Mt Wilhelm	Malaise	P1451	9741	700	MAL-MW0700D-16/16-d16
TZ00304	Cicadellidae	Sp571	1	Mt Wilhelm	Malaise	P1451	9741	700	MAL-MW0700D-16/16-d16
TZ00305	Heteroptera	Sp499	1	Mt Wilhelm	Malaise	P1451	9741	700	MAL-MW0700D-16/16-d16
TZ00306	Heteroptera	Sp475	1	Mt Wilhelm	Malaise	P1451	9741	700	MAL-MW0700D-16/16-d16
TZ00307	Cicadellidae	Sp506	1	Mt Wilhelm	Malaise	P1451	9741	700	MAL-MW0700D-16/16-d16
TZ00308	Cicadellidae	Sp572	1	Mt Wilhelm	Malaise	P1451	9741	700	MAL-MW0700D-16/16-d16
TZ00309	Cicadellidae	Sp510	1	Mt Wilhelm	Malaise	P1451	9741	700	MAL-MW0700D-16/16-d16
TZ00310	Cicadellidae	Sp487	4	Mt Wilhelm	Malaise	P1393	5844	700	MAL-MW0700A-06/16-d06
TZ00311	Cicadellidae	Sp444	2	Mt Wilhelm	Malaise	P1393	5844	700	MAL-MW0700A-06/16-d06
TZ00312	Cicadellidae	Sp548	2	Mt Wilhelm	Malaise	P1393	5844	700	MAL-MW0700A-06/16-d06
TZ00313	Cicadellidae	Sp573	1	Mt Wilhelm	Malaise	P1393	5844	700	MAL-MW0700A-06/16-d06
TZ00314	Meenoplidae	Sp471	1	Mt Wilhelm	Malaise	P1393	5844	700	MAL-MW0700A-06/16-d06
TZ00315	Derbidae	Sp574	1	Mt Wilhelm	Malaise	P1393	5844	700	MAL-MW0700A-06/16-d06
TZ00316	Derbidae	Sp575	1	Mt Wilhelm	Malaise	P1393	5844	700	MAL-MW0700A-06/16-d06
TZ00317	Cicadellidae	Sp444	3	Mt Wilhelm	Malaise	P1415	9696	700	MAL-MW0700B-12/16-d12
TZ00318	Cicadellidae	Sp487	3	Mt Wilhelm	Malaise	P1415	9696	700	MAL-MW0700B-12/16-d12
TZ00319	Cicadellidae	Sp465	1	Mt Wilhelm	Malaise	P1446	5855	700	MAL-MW0700D-11/16-d11
TZ00320	Cicadellidae	Sp444	1	Mt Wilhelm	Malaise	P1446	5855	700	MAL-MW0700D-11/16-d11
TZ00321	Cicadellidae	Sp487	1	Mt Wilhelm	Malaise	P1446	5855	700	MAL-MW0700D-11/16-d11
TZ00322	Cicadellidae	Sp562	1	Mt Wilhelm	Malaise	P1446	5855	700	MAL-MW0700D-11/16-d11
TZ00323	Heteroptera	Sp576	1	Mt Wilhelm	Malaise	P1393	5844	700	MAL-MW0700A-06/16-d06
TZ00324	Heteroptera	Sp577	1	Mt Wilhelm	Malaise	P1415	9696	700	MAL-MW0700B-12/16-d12
TZ00325	Neolieftinckana fuscata (Guénin-Méneville, 1838)	Sp578	1	Mt Wilhelm	Malaise	P1446	5855	700	MAL-MW0700D-11/16-d11
	Total different species	133		Total Abundance	597
	Total cicadellidae species	81		Total cicadellidae	523
	Total achilidae species	0		Total Fulgoromorpha	43
	Total cixiidae species	12
	Total derbidae species	18		Total major sp (sp444)	216
	Total delphacidae species	3		% total	0.361809
	Total cercopidae species	1		% cicadellidae	0.413002
	Cixiidae	14
	Heteroptera	19
	Derbidae	20
	Delphacidae	3
	Fulgoromorpha	5
	Achilidae	0
	Cercopidae	1
	Meenoplidae	4
	Flatidae	2

## Sheet: Mt Wilhelm 200m
					Key to the code	MAL: Malaise - MW: Mount Wilhelm, 0200: elevation (m), A: plot -xx/16: day xx/16 - dxx: day xx
MNHN Voucher	Taxa	Species	abundance	Site	Method	Short sample code	Val number	Altitude (m)	detailed sample code
TA00001	Fulgoromorpha (Larve)	Sp579	1	Mt Wilhelm	Malaise	P0998	11869	200	MAL-MW0200A-01/16-d01
TA00002	Cicadellidae	Sp513	1	Mt Wilhelm	Malaise	P0998	11869	200	MAL-MW0200A-01/16-d01
TA00003	Cicadellidae	Sp444	8	Mt Wilhelm	Malaise	P0998	11869	200	MAL-MW0200A-01/16-d01
TA00004	Cicadellidae	Sp580	3	Mt Wilhelm	Malaise	P0998	11869	200	MAL-MW0200A-01/16-d01
TA00005	Cicadellidae	Sp487	18	Mt Wilhelm	Malaise	P0998	11869	200	MAL-MW0200A-01/16-d01
TA00006	Cicadellidae	Sp337	1	Mt Wilhelm	Malaise	P0998	11869	200	MAL-MW0200A-01/16-d01
TA00007	Cicadellidae	Sp411	1	Mt Wilhelm	Malaise	P0998	11869	200	MAL-MW0200A-01/16-d01
TA00008	Achilidae	Sp18	1	Mt Wilhelm	Malaise	P0998	11869	200	MAL-MW0200A-01/16-d01
TA00009	Achilidae	Sp18	1	Mt Wilhelm	Malaise	P0999	11597	200	MAL-MW0200A-02/16-d02
TA00010	Fulgoromorpha (Larve)	Sp579	2	Mt Wilhelm	Malaise	P0999	11597	200	MAL-MW0200A-02/16-d02
TA00011	Achilidae	Sp581	2	Mt Wilhelm	Malaise	P0999	11597	200	MAL-MW0200A-02/16-d02
TA00012	Derbidae	Sp582	1	Mt Wilhelm	Malaise	P0999	11597	200	MAL-MW0200A-02/16-d02
TA00013	Cicadellidae	Sp583	1	Mt Wilhelm	Malaise	P0999	11597	200	MAL-MW0200A-02/16-d02
TA00014	Cicadellidae	Sp444	10	Mt Wilhelm	Malaise	P0999	11597	200	MAL-MW0200A-02/16-d02
TA00015	Cicadellidae	Sp487	19	Mt Wilhelm	Malaise	P0999	11597	200	MAL-MW0200A-02/16-d02
TA00016	Cicadellidae	Sp337	1	Mt Wilhelm	Malaise	P0999	11597	200	MAL-MW0200A-02/16-d02
TA00017	Cicadellidae	Sp12	1	Mt Wilhelm	Malaise	P0999	11597	200	MAL-MW0200A-02/16-d02
TA00018	Cicadellidae	Sp584	1	Mt Wilhelm	Malaise	P0999	11597	200	MAL-MW0200A-02/16-d02
TA00019	Derbidae	Sp582	2	Mt Wilhelm	Malaise	P1000	11613	200	MAL-MW0200A-03/16-d03
TA00020	Fulgoromorpha (Larve)	Sp525	1	Mt Wilhelm	Malaise	P1000	11613	200	MAL-MW0200A-03/16-d03
TA00021	Cicadellidae	Sp337	1	Mt Wilhelm	Malaise	P1000	11613	200	MAL-MW0200A-03/16-d03
TA00022	Cicadellidae	Sp444	13	Mt Wilhelm	Malaise	P1000	11613	200	MAL-MW0200A-03/16-d03
TA00023	Cicadellidae	Sp487	16	Mt Wilhelm	Malaise	P1000	11613	200	MAL-MW0200A-03/16-d03
TA00024	Derbidae	Sp585	1	Mt Wilhelm	Malaise	P1000	11613	200	MAL-MW0200A-03/16-d03
TA00025	Achilidae	Sp586	1	Mt Wilhelm	Malaise	P1000	11613	200	MAL-MW0200A-03/16-d03
TA00026	Fulgoromorpha (Larve)	Sp587	1	Mt Wilhelm	Malaise	P1001	11779	200	MAL-MW0200A-04/16-d04
TA00027	Cicadellidae	Sp444	14	Mt Wilhelm	Malaise	P1001	11779	200	MAL-MW0200A-04/16-d04
TA00028	Cicadellidae	Sp487	6	Mt Wilhelm	Malaise	P1001	11779	200	MAL-MW0200A-04/16-d04
TA00029	Derbidae	Sp582	1	Mt Wilhelm	Malaise	P1002	5734	200	MAL-MW0200A-05/16-d05
TA00030	Achilidae	Sp581	1	Mt Wilhelm	Malaise	P1002	5734	200	MAL-MW0200A-05/16-d05
TA00031	Derbidae	Sp588	1	Mt Wilhelm	Malaise	P1002	5734	200	MAL-MW0200A-05/16-d05
TA00032	Cixiidae	Sp589	1	Mt Wilhelm	Malaise	P1002	5734	200	MAL-MW0200A-05/16-d05
TA00033	Cicadellidae	Sp590	1	Mt Wilhelm	Malaise	P1002	5734	200	MAL-MW0200A-05/16-d05
TA00034	Cicadellidae	Sp337	5	Mt Wilhelm	Malaise	P1002	5734	200	MAL-MW0200A-05/16-d05
TA00035	Cicadellidae	Sp444	17	Mt Wilhelm	Malaise	P1002	5734	200	MAL-MW0200A-05/16-d05
TA00036	Cicadellidae	Sp487	15	Mt Wilhelm	Malaise	P1002	5734	200	MAL-MW0200A-05/16-d05
TA00037	Cicadellidae	Sp591	1	Mt Wilhelm	Malaise	P1002	5734	200	MAL-MW0200A-05/16-d05
TA00038	Derbidae	Sp582	1	Mt Wilhelm	Malaise	P1003	5714	200	MAL-MW0200A-06/16-d06
TA00039	Cixiidae	Sp589	2	Mt Wilhelm	Malaise	P1003	5714	200	MAL-MW0200A-06/16-d06
TA00040	Cixiidae	Sp592	1	Mt Wilhelm	Malaise	P1003	5714	200	MAL-MW0200A-06/16-d06
TA00041	Ricaniidae	Sp593	1	Mt Wilhelm	Malaise	P1003	5714	200	MAL-MW0200A-06/16-d06
TA00042	Meenoplidae	Sp594	1	Mt Wilhelm	Malaise	P1003	5714	200	MAL-MW0200A-06/16-d06
TA00043	Achilidae	Sp595	1	Mt Wilhelm	Malaise	P1003	5714	200	MAL-MW0200A-06/16-d06
TA00044	Cicadellidae	Sp501	1	Mt Wilhelm	Malaise	P1003	5714	200	MAL-MW0200A-06/16-d06
TA00045	Cicadellidae	Sp498	1	Mt Wilhelm	Malaise	P1003	5714	200	MAL-MW0200A-06/16-d06
TA00046	Cicadellidae	Sp337	2	Mt Wilhelm	Malaise	P1003	5714	200	MAL-MW0200A-06/16-d06
TA00047	Cicadellidae	Sp444	8	Mt Wilhelm	Malaise	P1003	5714	200	MAL-MW0200A-06/16-d06
TA00048	Cicadellidae	Sp487	16	Mt Wilhelm	Malaise	P1003	5714	200	MAL-MW0200A-06/16-d06
TA00049	Cixiidae	Sp592	1	Mt Wilhelm	Malaise	P1004	5724	200	MAL-MW0200A-07/16-d07
TA00050	Fulgoromorpha (Larve)	Sp579	1	Mt Wilhelm	Malaise	P1004	5724	200	MAL-MW0200A-07/16-d07
TA00051	Meenoplidae	Sp596	1	Mt Wilhelm	Malaise	P1004	5724	200	MAL-MW0200A-07/16-d07
TA00052	Cicadellidae	Sp337	1	Mt Wilhelm	Malaise	P1004	5724	200	MAL-MW0200A-07/16-d07
TA00053	Cicadellidae	Sp444	16	Mt Wilhelm	Malaise	P1004	5724	200	MAL-MW0200A-07/16-d07
TA00054	Cicadellidae	Sp487	26	Mt Wilhelm	Malaise	P1004	5724	200	MAL-MW0200A-07/16-d07
TA00055	Achilidae	Sp18	1	Mt Wilhelm	Malaise	P1005	5704	200	MAL-MW0200A-08/16-d08
TA00056	Meenoplidae	Sp596	1	Mt Wilhelm	Malaise	P1005	5704	200	MAL-MW0200A-08/16-d08
TA00057	Cixiidae	Sp589	1	Mt Wilhelm	Malaise	P1005	5704	200	MAL-MW0200A-08/16-d08
TA00058	Cixiidae	Sp597	1	Mt Wilhelm	Malaise	P1005	5704	200	MAL-MW0200A-08/16-d08
TA00059	Derbidae	Sp598	1	Mt Wilhelm	Malaise	P1005	5704	200	MAL-MW0200A-08/16-d08
TA00060	Fulgoromorpha (Larve)	Sp599	1	Mt Wilhelm	Malaise	P1005	5704	200	MAL-MW0200A-08/16-d08
TA00061	Cicadellidae	Sp600	1	Mt Wilhelm	Malaise	P1005	5704	200	MAL-MW0200A-08/16-d08
TA00062	Cicadellidae	Sp601	1	Mt Wilhelm	Malaise	P1005	5704	200	MAL-MW0200A-08/16-d08
TA00063	Cicadellidae	Sp542	1	Mt Wilhelm	Malaise	P1005	5704	200	MAL-MW0200A-08/16-d08
TA00064	Cicadellidae	Sp444	13	Mt Wilhelm	Malaise	P1005	5704	200	MAL-MW0200A-08/16-d08
TA00065	Cicadellidae	Sp487	11	Mt Wilhelm	Malaise	P1005	5704	200	MAL-MW0200A-08/16-d08
TA00066	Cicadellidae	Sp552	2	Mt Wilhelm	Malaise	P1005	5704	200	MAL-MW0200A-08/16-d08
TA00067	Cicadellidae	Sp465	1	Mt Wilhelm	Malaise	P1005	5704	200	MAL-MW0200A-08/16-d08
TA00068	Cicadellidae	Sp602	2	Mt Wilhelm	Malaise	P1005	5704	200	MAL-MW0200A-08/16-d08
TA00069	Achilidae	Sp18	1	Mt Wilhelm	Malaise	P1006	5721	200	MAL-MW0200A-09/16-d09
TA00070	Cixiidae	Sp592	1	Mt Wilhelm	Malaise	P1006	5721	200	MAL-MW0200A-09/16-d09
TA00071	Derbidae	Sp585	1	Mt Wilhelm	Malaise	P1006	5721	200	MAL-MW0200A-09/16-d09
TA00072	Achilidae	Sp581	1	Mt Wilhelm	Malaise	P1006	5721	200	MAL-MW0200A-09/16-d09
TA00073	Cixiidae	Sp589	1	Mt Wilhelm	Malaise	P1006	5721	200	MAL-MW0200A-09/16-d09
TA00074	Heteroptera	Sp381	1	Mt Wilhelm	Malaise	P1006	5721	200	MAL-MW0200A-09/16-d09
TA00075	Cicadellidae	Sp29	1	Mt Wilhelm	Malaise	P1006	5721	200	MAL-MW0200A-09/16-d09
TA00076	Cicadellidae	Sp603	1	Mt Wilhelm	Malaise	P1006	5721	200	MAL-MW0200A-09/16-d09
TA00077	Cicadellidae	Sp32	2	Mt Wilhelm	Malaise	P1006	5721	200	MAL-MW0200A-09/16-d09
TA00078	Cicadellidae	Sp12	1	Mt Wilhelm	Malaise	P1006	5721	200	MAL-MW0200A-09/16-d09
TA00079	Cicadellidae	Sp604	1	Mt Wilhelm	Malaise	P1006	5721	200	MAL-MW0200A-09/16-d09
TA00080	Cicadellidae	Sp337	1	Mt Wilhelm	Malaise	P1006	5721	200	MAL-MW0200A-09/16-d09
TA00081	Cicadellidae	Sp605	1	Mt Wilhelm	Malaise	P1006	5721	200	MAL-MW0200A-09/16-d09
TA00082	Cicadellidae	Sp444	27	Mt Wilhelm	Malaise	P1006	5721	200	MAL-MW0200A-09/16-d09
TA00083	Cicadellidae	Sp487	17	Mt Wilhelm	Malaise	P1006	5721	200	MAL-MW0200A-09/16-d09
TA00084	Cicadellidae	Sp606	1	Mt Wilhelm	Malaise	P1006	5721	200	MAL-MW0200A-09/16-d09
TA00085	Cicadellidae	Sp607	1	Mt Wilhelm	Malaise	P1006	5721	200	MAL-MW0200A-09/16-d09
TA00086	Cicadellidae	Sp608	1	Mt Wilhelm	Malaise	P1006	5721	200	MAL-MW0200A-09/16-d09
TA00087	Cicadellidae	Sp609	1	Mt Wilhelm	Malaise	P1006	5721	200	MAL-MW0200A-09/16-d09
TA00088	Fulgoromorpha (Larve)	Sp610	1	Mt Wilhelm	Malaise	P1006	5721	200	MAL-MW0200A-09/16-d09
TA00089	Derbidae	Sp585	1	Mt Wilhelm	Malaise	P1007	5726	200	MAL-MW0200A-10/16-d10
TA00090	Cixiidae	Sp589	2	Mt Wilhelm	Malaise	P1007	5726	200	MAL-MW0200A-10/16-d10
TA00091	Cixiidae	Sp592	1	Mt Wilhelm	Malaise	P1007	5726	200	MAL-MW0200A-10/16-d10
TA00092	Cixiidae	Sp611	1	Mt Wilhelm	Malaise	P1007	5726	200	MAL-MW0200A-10/16-d10
TA00093	Cicadellidae	Sp337	4	Mt Wilhelm	Malaise	P1007	5726	200	MAL-MW0200A-10/16-d10
TA00094	Cicadellidae	Sp604	1	Mt Wilhelm	Malaise	P1007	5726	200	MAL-MW0200A-10/16-d10
TA00095	Cicadellidae	Sp465	1	Mt Wilhelm	Malaise	P1007	5726	200	MAL-MW0200A-10/16-d10
TA00096	Cicadellidae	Sp612	1	Mt Wilhelm	Malaise	P1007	5726	200	MAL-MW0200A-10/16-d10
TA00097	Cicadellidae	Sp32	1	Mt Wilhelm	Malaise	P1007	5726	200	MAL-MW0200A-10/16-d10
TA00098	Cicadellidae	Sp542	1	Mt Wilhelm	Malaise	P1007	5726	200	MAL-MW0200A-10/16-d10
TA00099	Cicadellidae	Sp444	14	Mt Wilhelm	Malaise	P1007	5726	200	MAL-MW0200A-10/16-d10
TA00100	Cicadellidae	Sp487	24	Mt Wilhelm	Malaise	P1007	5726	200	MAL-MW0200A-10/16-d10
TA00101	Cicadellidae	Sp501	1	Mt Wilhelm	Malaise	P1007	5726	200	MAL-MW0200A-10/16-d10
TA00102	Cicadellidae	Sp510	2	Mt Wilhelm	Malaise	P1007	5726	200	MAL-MW0200A-10/16-d10
TA00103	Cicadellidae	Sp613	1	Mt Wilhelm	Malaise	P1007	5726	200	MAL-MW0200A-10/16-d10
TA00104	Cicadellidae	Sp614	1	Mt Wilhelm	Malaise	P1007	5726	200	MAL-MW0200A-10/16-d10
TA00105	Achilidae	Sp18	2	Mt Wilhelm	Malaise	P1008	5708	200	MAL-MW0200A-11/16-d11
TA00106	Achilidae	Sp581	1	Mt Wilhelm	Malaise	P1008	5708	200	MAL-MW0200A-11/16-d11
TA00107	Fulgoromorpha (Larve)	Sp579	1	Mt Wilhelm	Malaise	P1008	5708	200	MAL-MW0200A-11/16-d11
TA00108	Cicadellidae	Sp607	2	Mt Wilhelm	Malaise	P1008	5708	200	MAL-MW0200A-11/16-d11
TA00109	Cicadellidae	Sp501	1	Mt Wilhelm	Malaise	P1008	5708	200	MAL-MW0200A-11/16-d11
TA00110	Cicadellidae	Sp12	3	Mt Wilhelm	Malaise	P1008	5708	200	MAL-MW0200A-11/16-d11
TA00111	Cicadellidae	Sp337	3	Mt Wilhelm	Malaise	P1008	5708	200	MAL-MW0200A-11/16-d11
TA00112	Cicadellidae	Sp32	1	Mt Wilhelm	Malaise	P1008	5708	200	MAL-MW0200A-11/16-d11
TA00113	Cicadellidae	Sp444	12	Mt Wilhelm	Malaise	P1008	5708	200	MAL-MW0200A-11/16-d11
TA00114	Cicadellidae	Sp487	14	Mt Wilhelm	Malaise	P1008	5708	200	MAL-MW0200A-11/16-d11
TA00115	Cicadellidae	Sp590	1	Mt Wilhelm	Malaise	P1008	5708	200	MAL-MW0200A-11/16-d11
TA00116	Psylloidea	Sp615	1	Mt Wilhelm	Malaise	P1008	5708	200	MAL-MW0200A-11/16-d11
TA00117	Achilidae	Sp18	1	Mt Wilhelm	Malaise	P1009	5722	200	MAL-MW0200A-12/16-d12
TA00118	Fulgoromorpha (Larve)	Sp610	1	Mt Wilhelm	Malaise	P1009	5722	200	MAL-MW0200A-12/16-d12
TA00119	Cixiidae	Sp589	2	Mt Wilhelm	Malaise	P1009	5722	200	MAL-MW0200A-12/16-d12
TA00120	Cicadellidae	Sp337	2	Mt Wilhelm	Malaise	P1009	5722	200	MAL-MW0200A-12/16-d12
TA00121	Cicadellidae	Sp487	8	Mt Wilhelm	Malaise	P1009	5722	200	MAL-MW0200A-12/16-d12
TA00122	Cicadellidae	Sp444	26	Mt Wilhelm	Malaise	P1009	5722	200	MAL-MW0200A-12/16-d12
TA00123	Cicadellidae	Sp607	1	Mt Wilhelm	Malaise	P1009	5722	200	MAL-MW0200A-12/16-d12
TA00124	Cicadellidae	Sp616	1	Mt Wilhelm	Malaise	P1009	5722	200	MAL-MW0200A-12/16-d12
TA00125	Cicadellidae	Sp617	1	Mt Wilhelm	Malaise	P1009	5722	200	MAL-MW0200A-12/16-d12
TA00126	Fulgoromorpha (Larve)	Sp618	1	Mt Wilhelm	Malaise	P1010	9708	200	MAL-MW0200A-13/16-d13
TA00127	Achilidae	Sp581	2	Mt Wilhelm	Malaise	P1010	9708	200	MAL-MW0200A-13/16-d13
TA00128	Cixiidae	Sp619	3	Mt Wilhelm	Malaise	P1010	9708	200	MAL-MW0200A-13/16-d13
TA00129	Cicadellidae	Sp600	1	Mt Wilhelm	Malaise	P1010	9708	200	MAL-MW0200A-13/16-d13
TA00130	Cicadellidae	Sp337	4	Mt Wilhelm	Malaise	P1010	9708	200	MAL-MW0200A-13/16-d13
TA00131	Cicadellidae	Sp487	11	Mt Wilhelm	Malaise	P1010	9708	200	MAL-MW0200A-13/16-d13
TA00132	Cicadellidae	Sp444	41	Mt Wilhelm	Malaise	P1010	9708	200	MAL-MW0200A-13/16-d13
TA00133	Cicadellidae	Sp620	1	Mt Wilhelm	Malaise	P1010	9708	200	MAL-MW0200A-13/16-d13
TA00134	Achilidae	Sp581	1	Mt Wilhelm	Malaise	P1011	9729	200	MAL-MW0200A-14/16-d14
TA00135	Cixiidae	Sp621	1	Mt Wilhelm	Malaise	P1011	9729	200	MAL-MW0200A-14/16-d14
TA00136	Delphacidae	Sp622	1	Mt Wilhelm	Malaise	P1011	9729	200	MAL-MW0200A-14/16-d14
TA00137	Cicadellidae	Sp623	1	Mt Wilhelm	Malaise	P1011	9729	200	MAL-MW0200A-14/16-d14
TA00138	Cicadellidae	Sp616	2	Mt Wilhelm	Malaise	P1011	9729	200	MAL-MW0200A-14/16-d14
TA00139	Cicadellidae	Sp465	1	Mt Wilhelm	Malaise	P1011	9729	200	MAL-MW0200A-14/16-d14
TA00140	Cicadellidae	Sp444	25	Mt Wilhelm	Malaise	P1011	9729	200	MAL-MW0200A-14/16-d14
TA00141	Cicadellidae	Sp487	25	Mt Wilhelm	Malaise	P1011	9729	200	MAL-MW0200A-14/16-d14
TA00142	Cicadellidae	Sp624	1	Mt Wilhelm	Malaise	P1011	9729	200	MAL-MW0200A-14/16-d14
TA00143	Cicadellidae	Sp625	1	Mt Wilhelm	Malaise	P1011	9729	200	MAL-MW0200A-14/16-d14
TA00144	Fulgoromorpha (Larve)	Sp610	1	Mt Wilhelm	Malaise	P1012	9694	200	MAL-MW0200A-15/16-d15
TA00145	Cicadellidae	Sp337	1	Mt Wilhelm	Malaise	P1012	9694	200	MAL-MW0200A-15/16-d15
TA00146	Cicadellidae	Sp444	7	Mt Wilhelm	Malaise	P1012	9694	200	MAL-MW0200A-15/16-d15
TA00147	Cicadellidae	Sp487	7	Mt Wilhelm	Malaise	P1012	9694	200	MAL-MW0200A-15/16-d15
TA00148	Cicadellidae	Sp41	1	Mt Wilhelm	Malaise	P1012	9694	200	MAL-MW0200A-15/16-d15
TA00149	Cicadellidae	Sp607	2	Mt Wilhelm	Malaise	P1012	9694	200	MAL-MW0200A-15/16-d15
TA00150	Cicadellidae	Sp614	1	Mt Wilhelm	Malaise	P1012	9694	200	MAL-MW0200A-15/16-d15
TA00151	Cicadellidae	Sp626	1	Mt Wilhelm	Malaise	P1012	9694	200	MAL-MW0200A-15/16-d15
TA00152	Cicadellidae	Sp444	12	Mt Wilhelm	Malaise	P1013	9747	200	MAL-MW0200A-16/16-d16
TA00153	Cicadellidae	Sp487	15	Mt Wilhelm	Malaise	P1013	9747	200	MAL-MW0200A-16/16-d16
TA00154	Derbidae	Sp582	1	Mt Wilhelm	Malaise	P1013	9747	200	MAL-MW0200A-16/16-d16
TA00155	Cixiidae	Sp619	1	Mt Wilhelm	Malaise	P1013	9747	200	MAL-MW0200A-16/16-d16
TA00156	Achilidae	Sp627	1	Mt Wilhelm	Malaise	P1013	9747	200	MAL-MW0200A-16/16-d16
TA00157	Heteroptera	Sp381	2	Mt Wilhelm	Malaise	P1013	9747	200	MAL-MW0200A-16/16-d16
TA00158	Cicadellidae	Sp628	1	Mt Wilhelm	Malaise	P1014	11839	200	MAL-MW0200B-01/16-d01
TA00159	Cicadellidae	Sp629	2	Mt Wilhelm	Malaise	P1014	11839	200	MAL-MW0200B-01/16-d01
TA00160	Cicadellidae	Sp630	1	Mt Wilhelm	Malaise	P1014	11839	200	MAL-MW0200B-01/16-d01
TA00161	Cicadellidae	Sp337	2	Mt Wilhelm	Malaise	P1014	11839	200	MAL-MW0200B-01/16-d01
TA00162	Cicadellidae	Sp32	1	Mt Wilhelm	Malaise	P1014	11839	200	MAL-MW0200B-01/16-d01
TA00163	Cicadellidae	Sp7	1	Mt Wilhelm	Malaise	P1014	11839	200	MAL-MW0200B-01/16-d01
TA00164	Cicadellidae	Sp444	16	Mt Wilhelm	Malaise	P1014	11839	200	MAL-MW0200B-01/16-d01
TA00165	Cicadellidae	Sp487	15	Mt Wilhelm	Malaise	P1014	11839	200	MAL-MW0200B-01/16-d01
TA00166	Cicadellidae	Sp631	1	Mt Wilhelm	Malaise	P1014	11839	200	MAL-MW0200B-01/16-d01
TA00167	Achilidae	Sp581	1	Mt Wilhelm	Malaise	P1014	11839	200	MAL-MW0200B-01/16-d01
TA00168	Cixiidae	Sp589	1	Mt Wilhelm	Malaise	P1014	11839	200	MAL-MW0200B-01/16-d01
TA00169	Cixiidae	Sp632	1	Mt Wilhelm	Malaise	P1014	11839	200	MAL-MW0200B-01/16-d01
TA00170	Meenoplidae	Sp633	1	Mt Wilhelm	Malaise	P1014	11839	200	MAL-MW0200B-01/16-d01
TA00171	Meenoplidae	Sp634	1	Mt Wilhelm	Malaise	P1014	11839	200	MAL-MW0200B-01/16-d01
TA00172	Achilidae	Sp18	1	Mt Wilhelm	Malaise	P1015	11600	200	MAL-MW0200B-02/16-d02
TA00173	Achilidae	Sp635	1	Mt Wilhelm	Malaise	P1015	11600	200	MAL-MW0200B-02/16-d02
TA00174	Cixiidae	Sp592	1	Mt Wilhelm	Malaise	P1015	11600	200	MAL-MW0200B-02/16-d02
TA00175	Cicadellidae	Sp337	3	Mt Wilhelm	Malaise	P1015	11600	200	MAL-MW0200B-02/16-d02
TA00176	Cicadellidae	Sp444	17	Mt Wilhelm	Malaise	P1015	11600	200	MAL-MW0200B-02/16-d02
TA00177	Cicadellidae	Sp487	11	Mt Wilhelm	Malaise	P1015	11600	200	MAL-MW0200B-02/16-d02
TA00178	Cicadellidae	Sp636	1	Mt Wilhelm	Malaise	P1015	11600	200	MAL-MW0200B-02/16-d02
TA00179	Meenoplidae	Sp633	5	Mt Wilhelm	Malaise	P1015	11600	200	MAL-MW0200B-02/16-d02
TA00180	Achilidae	Sp18	1	Mt Wilhelm	Malaise	P1016	11585	200	MAL-MW0200B-03/16-d03
TA00181	Flatidae	Sp637	1	Mt Wilhelm	Malaise	P1016	11585	200	MAL-MW0200B-03/16-d03
TA00182	Cicadellidae	Sp337	3	Mt Wilhelm	Malaise	P1016	11585	200	MAL-MW0200B-03/16-d03
TA00183	Meenoplidae	Sp633	2	Mt Wilhelm	Malaise	P1016	11585	200	MAL-MW0200B-03/16-d03
TA00184	Cicadellidae	Sp29	1	Mt Wilhelm	Malaise	P1016	11585	200	MAL-MW0200B-03/16-d03
TA00185	Cicadellidae	Sp444	18	Mt Wilhelm	Malaise	P1016	11585	200	MAL-MW0200B-03/16-d03
TA00186	Cicadellidae	Sp487	9	Mt Wilhelm	Malaise	P1016	11585	200	MAL-MW0200B-03/16-d03
TA00187	Heteroptera	Sp638	1	Mt Wilhelm	Malaise	P1016	11585	200	MAL-MW0200B-03/16-d03
TA00188	Derbidae	Sp639	1	Mt Wilhelm	Malaise	P1016	11585	200	MAL-MW0200B-03/16-d03
TA00189	Achilidae	Sp18	1	Mt Wilhelm	Malaise	P1017	11609	200	MAL-MW0200B-04/16-d04
TA00190	Cixiidae	Sp621	1	Mt Wilhelm	Malaise	P1017	11609	200	MAL-MW0200B-04/16-d04
TA00191	Meenoplidae	Sp633	2	Mt Wilhelm	Malaise	P1017	11609	200	MAL-MW0200B-04/16-d04
TA00192	Cicadellidae	Sp629	1	Mt Wilhelm	Malaise	P1017	11609	200	MAL-MW0200B-04/16-d04
TA00193	Cicadellidae	Sp337	1	Mt Wilhelm	Malaise	P1017	11609	200	MAL-MW0200B-04/16-d04
TA00194	Cicadellidae	Sp444	14	Mt Wilhelm	Malaise	P1017	11609	200	MAL-MW0200B-04/16-d04
TA00195	Cicadellidae	Sp487	16	Mt Wilhelm	Malaise	P1017	11609	200	MAL-MW0200B-04/16-d04
TA00196	Cicadellidae	Sp640	1	Mt Wilhelm	Malaise	P1017	11609	200	MAL-MW0200B-04/16-d04
TA00197	Fulgoromorpha (Larve)	Sp641	1	Mt Wilhelm	Malaise	P1017	11609	200	MAL-MW0200B-04/16-d04
TA00198	Cixiidae	Sp526	1	Mt Wilhelm	Malaise	P1018	5738	200	MAL-MW0200B-05/16-d05
TA00199	Cicadellidae	Sp29	1	Mt Wilhelm	Malaise	P1018	5738	200	MAL-MW0200B-05/16-d05
TA00200	Cicadellidae	Sp337	6	Mt Wilhelm	Malaise	P1018	5738	200	MAL-MW0200B-05/16-d05
TA00201	Cicadellidae	Sp444	16	Mt Wilhelm	Malaise	P1018	5738	200	MAL-MW0200B-05/16-d05
TA00202	Cicadellidae	Sp487	13	Mt Wilhelm	Malaise	P1018	5738	200	MAL-MW0200B-05/16-d05
TA00203	Cicadellidae	Sp642	1	Mt Wilhelm	Malaise	P1018	5738	200	MAL-MW0200B-05/16-d05
TA00204	Achilidae	Sp635	1	Mt Wilhelm	Malaise	P1018	5738	200	MAL-MW0200B-05/16-d05
TA00205	Achilidae	Sp18	1	Mt Wilhelm	Malaise	P1019	5718	200	MAL-MW0200B-06/16-d06
TA00206	Meenoplidae	Sp633	1	Mt Wilhelm	Malaise	P1019	5718	200	MAL-MW0200B-06/16-d06
TA00207	Derbidae	Sp643	1	Mt Wilhelm	Malaise	P1019	5718	200	MAL-MW0200B-06/16-d06
TA00208	Cicadellidae	Sp337	5	Mt Wilhelm	Malaise	P1019	5718	200	MAL-MW0200B-06/16-d06
TA00209	Cicadellidae	Sp513	1	Mt Wilhelm	Malaise	P1019	5718	200	MAL-MW0200B-06/16-d06
TA00210	Cicadellidae	Sp32	1	Mt Wilhelm	Malaise	P1019	5718	200	MAL-MW0200B-06/16-d06
TA00211	Cicadellidae	Sp444	13	Mt Wilhelm	Malaise	P1019	5718	200	MAL-MW0200B-06/16-d06
TA00212	Cicadellidae	Sp487	13	Mt Wilhelm	Malaise	P1019	5718	200	MAL-MW0200B-06/16-d06
TA00213	Meenoplidae	Sp633	5	Mt Wilhelm	Malaise	P1020	5717	200	MAL-MW0200B-07/16-d07
TA00214	Cicadellidae	Sp41	1	Mt Wilhelm	Malaise	P1020	5717	200	MAL-MW0200B-07/16-d07
TA00215	Cicadellidae	Sp402	1	Mt Wilhelm	Malaise	P1020	5717	200	MAL-MW0200B-07/16-d07
TA00216	Cicadellidae	Sp644	1	Mt Wilhelm	Malaise	P1020	5717	200	MAL-MW0200B-07/16-d07
TA00217	Cicadellidae	Sp645	1	Mt Wilhelm	Malaise	P1020	5717	200	MAL-MW0200B-07/16-d07
TA00218	Cicadellidae	Sp337	5	Mt Wilhelm	Malaise	P1020	5717	200	MAL-MW0200B-07/16-d07
TA00219	Cicadellidae	Sp444	14	Mt Wilhelm	Malaise	P1020	5717	200	MAL-MW0200B-07/16-d07
TA00220	Cicadellidae	Sp487	13	Mt Wilhelm	Malaise	P1020	5717	200	MAL-MW0200B-07/16-d07
TA00221	Fulgoromorpha (Larve)	Sp646	1	Mt Wilhelm	Malaise	P1020	5717	200	MAL-MW0200B-07/16-d07
TA00222	Cixiidae	Sp619	2	Mt Wilhelm	Malaise	P1021	5703	200	MAL-MW0200B-08/16-d08
TA00223	Meenoplidae	Sp633	2	Mt Wilhelm	Malaise	P1021	5703	200	MAL-MW0200B-08/16-d08
TA00224	Derbidae	Sp647	1	Mt Wilhelm	Malaise	P1021	5703	200	MAL-MW0200B-08/16-d08
TA00225	Cicadellidae	Sp648	1	Mt Wilhelm	Malaise	P1021	5703	200	MAL-MW0200B-08/16-d08
TA00226	Cicadellidae	Sp649	1	Mt Wilhelm	Malaise	P1021	5703	200	MAL-MW0200B-08/16-d08
TA00227	Cicadellidae	Sp650	1	Mt Wilhelm	Malaise	P1021	5703	200	MAL-MW0200B-08/16-d08
TA00228	Cicadellidae	Sp337	3	Mt Wilhelm	Malaise	P1021	5703	200	MAL-MW0200B-08/16-d08
TA00229	Cicadellidae	Sp444	11	Mt Wilhelm	Malaise	P1021	5703	200	MAL-MW0200B-08/16-d08
TA00230	Cicadellidae	Sp487	19	Mt Wilhelm	Malaise	P1021	5703	200	MAL-MW0200B-08/16-d08
TA00231	Achilidae	Sp18	1	Mt Wilhelm	Malaise	P1022	5701	200	MAL-MW0200B-09/16-d09
TA00232	Meenoplidae	Sp633	4	Mt Wilhelm	Malaise	P1022	5701	200	MAL-MW0200B-09/16-d09
TA00233	Cercopidae	Sp495	1	Mt Wilhelm	Malaise	P1022	5701	200	MAL-MW0200B-09/16-d09
TA00234	Cicadellidae	Sp607	1	Mt Wilhelm	Malaise	P1022	5701	200	MAL-MW0200B-09/16-d09
TA00235	Cicadellidae	Sp651	1	Mt Wilhelm	Malaise	P1022	5701	200	MAL-MW0200B-09/16-d09
TA00236	Cicadellidae	Sp337	2	Mt Wilhelm	Malaise	P1022	5701	200	MAL-MW0200B-09/16-d09
TA00237	Cicadellidae	Sp444	24	Mt Wilhelm	Malaise	P1022	5701	200	MAL-MW0200B-09/16-d09
TA00238	Cicadellidae	Sp487	10	Mt Wilhelm	Malaise	P1022	5701	200	MAL-MW0200B-09/16-d09
TA00239	Meenoplidae	Sp633	1	Mt Wilhelm	Malaise	P1023	5737	200	MAL-MW0200B-10/16-d10
TA00240	Cixiidae	Sp619	1	Mt Wilhelm	Malaise	P1023	5737	200	MAL-MW0200B-10/16-d10
TA00241	Derbidae	Sp652	1	Mt Wilhelm	Malaise	P1023	5737	200	MAL-MW0200B-10/16-d10
TA00242	Cicadellidae	Sp444	14	Mt Wilhelm	Malaise	P1023	5737	200	MAL-MW0200B-10/16-d10
TA00243	Cicadellidae	Sp487	3	Mt Wilhelm	Malaise	P1023	5737	200	MAL-MW0200B-10/16-d10
TA00244	Cixiidae	Sp619	1	Mt Wilhelm	Malaise	P1024	5728	200	MAL-MW0200B-11/16-d11
TA00245	Cixiidae	Sp654	1	Mt Wilhelm	Malaise	P1024	5728	200	MAL-MW0200B-11/16-d11
TA00246	Cicadellidae	Sp465	1	Mt Wilhelm	Malaise	P1024	5728	200	MAL-MW0200B-11/16-d11
TA00247	Cicadellidae	Sp629	1	Mt Wilhelm	Malaise	P1024	5728	200	MAL-MW0200B-11/16-d11
TA00248	Cicadellidae	Sp337	4	Mt Wilhelm	Malaise	P1024	5728	200	MAL-MW0200B-11/16-d11
TA00249	Cicadellidae	Sp444	9	Mt Wilhelm	Malaise	P1024	5728	200	MAL-MW0200B-11/16-d11
TA00250	Cicadellidae	Sp487	10	Mt Wilhelm	Malaise	P1024	5728	200	MAL-MW0200B-11/16-d11
TA00251	Cixiidae	Sp592	1	Mt Wilhelm	Malaise	P1025	5736	200	MAL-MW0200B-12/16-d12
TA00252	Meenoplidae	Sp633	1	Mt Wilhelm	Malaise	P1025	5736	200	MAL-MW0200B-12/16-d12
TA00253	Achilidae	Sp635	1	Mt Wilhelm	Malaise	P1025	5736	200	MAL-MW0200B-12/16-d12
TA00254	Cicadellidae	Sp465	2	Mt Wilhelm	Malaise	P1025	5736	200	MAL-MW0200B-12/16-d12
TA00255	Cicadellidae	Sp444	7	Mt Wilhelm	Malaise	P1025	5736	200	MAL-MW0200B-12/16-d12
TA00256	Cicadellidae	Sp487	8	Mt Wilhelm	Malaise	P1025	5736	200	MAL-MW0200B-12/16-d12
TA00257	Derbidae	Sp653	1	Mt Wilhelm	Malaise	P1026	9737	200	MAL-MW0200B-13/16-d13
TA00258	Meenoplidae	Sp633	2	Mt Wilhelm	Malaise	P1026	9737	200	MAL-MW0200B-13/16-d13
TA00259	Cixiidae	Sp654	1	Mt Wilhelm	Malaise	P1026	9737	200	MAL-MW0200B-13/16-d13
TA00260	Cixiidae	Sp526	1	Mt Wilhelm	Malaise	P1026	9737	200	MAL-MW0200B-13/16-d13
TA00261	Cixiidae	Sp619	1	Mt Wilhelm	Malaise	P1026	9737	200	MAL-MW0200B-13/16-d13
TA00262	Cicadellidae	Sp29	1	Mt Wilhelm	Malaise	P1026	9737	200	MAL-MW0200B-13/16-d13
TA00263	Cicadellidae	Sp45	1	Mt Wilhelm	Malaise	P1026	9737	200	MAL-MW0200B-13/16-d13
TA00264	Cicadellidae	Sp259	1	Mt Wilhelm	Malaise	P1026	9737	200	MAL-MW0200B-13/16-d13
TA00265	Cicadellidae	Sp655	1	Mt Wilhelm	Malaise	P1026	9737	200	MAL-MW0200B-13/16-d13
TA00266	Cicadellidae	Sp337	4	Mt Wilhelm	Malaise	P1026	9737	200	MAL-MW0200B-13/16-d13
TA00267	Cicadellidae	Sp444	11	Mt Wilhelm	Malaise	P1026	9737	200	MAL-MW0200B-13/16-d13
TA00268	Cicadellidae	Sp487	13	Mt Wilhelm	Malaise	P1026	9737	200	MAL-MW0200B-13/16-d13
TA00269	Fulgoromorpha (Larve)	Sp656	1	Mt Wilhelm	Malaise	P1026	9737	200	MAL-MW0200B-13/16-d13
TA00270	Heteroptera	Sp657	1	Mt Wilhelm	Malaise	P1026	9737	200	MAL-MW0200B-13/16-d13
TA00271	Achilidae	Sp18	1	Mt Wilhelm	Malaise	P1027	9748	200	MAL-MW0200B-14/16-d14
TA00272	Achilidae	Sp581	1	Mt Wilhelm	Malaise	P1027	9748	200	MAL-MW0200B-14/16-d14
TA00273	Meenoplidae	Sp633	1	Mt Wilhelm	Malaise	P1027	9748	200	MAL-MW0200B-14/16-d14
TA00274	Cicadellidae	Sp444	9	Mt Wilhelm	Malaise	P1027	9748	200	MAL-MW0200B-14/16-d14
TA00275	Cicadellidae	Sp487	8	Mt Wilhelm	Malaise	P1027	9748	200	MAL-MW0200B-14/16-d14
TA00276	Issidae	Sp658	1	Mt Wilhelm	Malaise	P1027	9748	200	MAL-MW0200B-14/16-d14
TA00277	Cixiidae	Sp621	1	Mt Wilhelm	Malaise	P1028	9703	200	MAL-MW0200B-15/16-d15
TA00278	Derbidae	Sp659	1	Mt Wilhelm	Malaise	P1028	9703	200	MAL-MW0200B-15/16-d15
TA00279	Fulgoromorpha (Larve)	Sp610	1	Mt Wilhelm	Malaise	P1028	9703	200	MAL-MW0200B-15/16-d15
TA00280	Cicadellidae	Sp337	2	Mt Wilhelm	Malaise	P1028	9703	200	MAL-MW0200B-15/16-d15
TA00281	Cicadellidae	Sp444	3	Mt Wilhelm	Malaise	P1028	9703	200	MAL-MW0200B-15/16-d15
TA00282	Cicadellidae	Sp487	2	Mt Wilhelm	Malaise	P1028	9703	200	MAL-MW0200B-15/16-d15
TA00283	Cicadellidae	Sp624	1	Mt Wilhelm	Malaise	P1028	9703	200	MAL-MW0200B-15/16-d15
TA00284	Achilidae	Sp18	1	Mt Wilhelm	Malaise	P1029	9714	200	MAL-MW0200B-16/16-d16
TA00285	Meenoplidae	Sp633	2	Mt Wilhelm	Malaise	P1029	9714	200	MAL-MW0200B-16/16-d16
TA00286	Cixiidae	Sp621	1	Mt Wilhelm	Malaise	P1029	9714	200	MAL-MW0200B-16/16-d16
TA00287	Cixiidae	Sp619	2	Mt Wilhelm	Malaise	P1029	9714	200	MAL-MW0200B-16/16-d16
TA00288	Heteroptera	Sp381	1	Mt Wilhelm	Malaise	P1029	9714	200	MAL-MW0200B-16/16-d16
TA00289	Cicadellidae	Sp642	2	Mt Wilhelm	Malaise	P1029	9714	200	MAL-MW0200B-16/16-d16
TA00290	Cicadellidae	Sp660	1	Mt Wilhelm	Malaise	P1029	9714	200	MAL-MW0200B-16/16-d16
TA00291	Cicadellidae	Sp510	1	Mt Wilhelm	Malaise	P1029	9714	200	MAL-MW0200B-16/16-d16
TA00292	Cicadellidae	Sp661	1	Mt Wilhelm	Malaise	P1029	9714	200	MAL-MW0200B-16/16-d16
TA00293	Cicadellidae	Sp662	1	Mt Wilhelm	Malaise	P1029	9714	200	MAL-MW0200B-16/16-d16
TA00294	Cicadellidae	Sp337	2	Mt Wilhelm	Malaise	P1029	9714	200	MAL-MW0200B-16/16-d16
TA00295	Cicadellidae	Sp444	10	Mt Wilhelm	Malaise	P1029	9714	200	MAL-MW0200B-16/16-d16
TA00296	Cicadellidae	Sp487	4	Mt Wilhelm	Malaise	P1029	9714	200	MAL-MW0200B-16/16-d16
TA00297	Derbidae	Sp663	1	Mt Wilhelm	Malaise	P1030	11844	200	MAL-MW0200C-01/16-d01
TA00298	Cixiidae	Sp597	2	Mt Wilhelm	Malaise	P1030	11844	200	MAL-MW0200C-01/16-d01
TA00299	Cicadellidae	Sp590	2	Mt Wilhelm	Malaise	P1030	11844	200	MAL-MW0200C-01/16-d01
TA00300	Cicadellidae	Sp337	1	Mt Wilhelm	Malaise	P1030	11844	200	MAL-MW0200C-01/16-d01
TA00301	Cicadellidae	Sp123	1	Mt Wilhelm	Malaise	P1030	11844	200	MAL-MW0200C-01/16-d01
TA00302	Cicadellidae	Sp444	3	Mt Wilhelm	Malaise	P1030	11844	200	MAL-MW0200C-01/16-d01
TA00303	Cicadellidae	Sp487	3	Mt Wilhelm	Malaise	P1030	11844	200	MAL-MW0200C-01/16-d01
TA00304	Cicadellidae	Sp625	1	Mt Wilhelm	Malaise	P1030	11844	200	MAL-MW0200C-01/16-d01
TA00305	Cixiidae	Sp664	1	Mt Wilhelm	Malaise	P1031	11614	200	MAL-MW0200C-02/16-d02
TA00306	Cicadellidae	Sp590	1	Mt Wilhelm	Malaise	P1031	11614	200	MAL-MW0200C-02/16-d02
TA00307	Cicadellidae	Sp32	1	Mt Wilhelm	Malaise	P1031	11614	200	MAL-MW0200C-02/16-d02
TA00308	Cicadellidae	Sp401	1	Mt Wilhelm	Malaise	P1031	11614	200	MAL-MW0200C-02/16-d02
TA00309	Cicadellidae	Sp629	1	Mt Wilhelm	Malaise	P1031	11614	200	MAL-MW0200C-02/16-d02
TA00310	Cicadellidae	Sp337	2	Mt Wilhelm	Malaise	P1031	11614	200	MAL-MW0200C-02/16-d02
TA00311	Cicadellidae	Sp444	5	Mt Wilhelm	Malaise	P1031	11614	200	MAL-MW0200C-02/16-d02
TA00312	Cicadellidae	Sp487	7	Mt Wilhelm	Malaise	P1031	11614	200	MAL-MW0200C-02/16-d02
TA00313	Cicadellidae	Sp665	1	Mt Wilhelm	Malaise	P1031	11614	200	MAL-MW0200C-02/16-d02
TA00314	Cicadellidae	Sp465	3	Mt Wilhelm	Malaise	P1032	11594	200	MAL-MW0200C-03/16-d03
TA00315	Cicadellidae	Sp45	1	Mt Wilhelm	Malaise	P1032	11594	200	MAL-MW0200C-03/16-d03
TA00316	Cicadellidae	Sp590	1	Mt Wilhelm	Malaise	P1032	11594	200	MAL-MW0200C-03/16-d03
TA00317	Cicadellidae	Sp642	1	Mt Wilhelm	Malaise	P1032	11594	200	MAL-MW0200C-03/16-d03
TA00318	Cicadellidae	Sp665	1	Mt Wilhelm	Malaise	P1032	11594	200	MAL-MW0200C-03/16-d03
TA00319	Cicadellidae	Sp337	1	Mt Wilhelm	Malaise	P1032	11594	200	MAL-MW0200C-03/16-d03
TA00320	Cicadellidae	Sp444	5	Mt Wilhelm	Malaise	P1032	11594	200	MAL-MW0200C-03/16-d03
TA00321	Cicadellidae	Sp487	9	Mt Wilhelm	Malaise	P1032	11594	200	MAL-MW0200C-03/16-d03
TA00322	Cicadellidae	Sp32	1	Mt Wilhelm	Malaise	P1033	11854	200	MAL-MW0200C-04/16-d04
TA00323	Cicadellidae	Sp337	1	Mt Wilhelm	Malaise	P1033	11854	200	MAL-MW0200C-04/16-d04
TA00324	Cicadellidae	Sp444	3	Mt Wilhelm	Malaise	P1033	11854	200	MAL-MW0200C-04/16-d04
TA00325	Derbidae	Sp666	1	Mt Wilhelm	Malaise	P1033	11854	200	MAL-MW0200C-04/16-d04
TA00326	Cicadellidae	Sp32	1	Mt Wilhelm	Malaise	P1034	5731	200	MAL-MW0200C-05/16-d05
TA00327	Cicadellidae	Sp337	1	Mt Wilhelm	Malaise	P1034	5731	200	MAL-MW0200C-05/16-d05
TA00328	Cicadellidae	Sp444	2	Mt Wilhelm	Malaise	P1034	5731	200	MAL-MW0200C-05/16-d05
TA00329	Cicadellidae	Sp667	1	Mt Wilhelm	Malaise	P1035	5719	200	MAL-MW0200C-06/16-d06
TA00330	Cicadellidae	Sp513	1	Mt Wilhelm	Malaise	P1035	5719	200	MAL-MW0200C-06/16-d06
TA00331	Cicadellidae	Sp465	1	Mt Wilhelm	Malaise	P1035	5719	200	MAL-MW0200C-06/16-d06
TA00332	Cicadellidae	Sp444	6	Mt Wilhelm	Malaise	P1035	5719	200	MAL-MW0200C-06/16-d06
TA00333	Cicadellidae	Sp487	7	Mt Wilhelm	Malaise	P1035	5719	200	MAL-MW0200C-06/16-d06
TA00334	Cicadellidae	Sp465	1	Mt Wilhelm	Malaise	P1036	5706	200	MAL-MW0200C-07/16-d07
TA00335	Cicadellidae	Sp444	3	Mt Wilhelm	Malaise	P1036	5706	200	MAL-MW0200C-07/16-d07
TA00336	Cicadellidae	Sp487	3	Mt Wilhelm	Malaise	P1036	5706	200	MAL-MW0200C-07/16-d07
TA00337	Cicadellidae	Sp590	2	Mt Wilhelm	Malaise	P1037	5702	200	MAL-MW0200C-08/16-d08
TA00338	Cicadellidae	Sp32	1	Mt Wilhelm	Malaise	P1037	5702	200	MAL-MW0200C-08/16-d08
TA00339	Cicadellidae	Sp668	1	Mt Wilhelm	Malaise	P1037	5702	200	MAL-MW0200C-08/16-d08
TA00340	Cicadellidae	Sp669	2	Mt Wilhelm	Malaise	P1037	5702	200	MAL-MW0200C-08/16-d08
TA00341	Cicadellidae	Sp337	3	Mt Wilhelm	Malaise	P1037	5702	200	MAL-MW0200C-08/16-d08
TA00342	Cicadellidae	Sp465	1	Mt Wilhelm	Malaise	P1037	5702	200	MAL-MW0200C-08/16-d08
TA00343	Cicadellidae	Sp444	6	Mt Wilhelm	Malaise	P1037	5702	200	MAL-MW0200C-08/16-d08
TA00344	Cicadellidae	Sp487	4	Mt Wilhelm	Malaise	P1037	5702	200	MAL-MW0200C-08/16-d08
TA00345	Cixiidae	Sp670	2	Mt Wilhelm	Malaise	P1038	5727	200	MAL-MW0200C-09/16-d09
TA00346	Cixiidae	Sp671	1	Mt Wilhelm	Malaise	P1038	5727	200	MAL-MW0200C-09/16-d09
TA00347	Cicadellidae	Sp45	1	Mt Wilhelm	Malaise	P1038	5727	200	MAL-MW0200C-09/16-d09
TA00348	Cicadellidae	Sp672	1	Mt Wilhelm	Malaise	P1038	5727	200	MAL-MW0200C-09/16-d09
TA00349	Cicadellidae	Sp673	1	Mt Wilhelm	Malaise	P1038	5727	200	MAL-MW0200C-09/16-d09
TA00350	Cicadellidae	Sp337	1	Mt Wilhelm	Malaise	P1038	5727	200	MAL-MW0200C-09/16-d09
TA00351	Cicadellidae	Sp444	4	Mt Wilhelm	Malaise	P1038	5727	200	MAL-MW0200C-09/16-d09
TA00352	Cicadellidae	Sp487	4	Mt Wilhelm	Malaise	P1038	5727	200	MAL-MW0200C-09/16-d09
TA00353	Delphacidae	Sp674	1	Mt Wilhelm	Malaise	P1039	5732	200	MAL-MW0200C-10/16-d10
TA00354	Fulgoromorpha (Larve)	Sp675	1	Mt Wilhelm	Malaise	P1039	5732	200	MAL-MW0200C-10/16-d10
TA00355	Cicadellidae	Sp41	1	Mt Wilhelm	Malaise	P1039	5732	200	MAL-MW0200C-10/16-d10
TA00356	Cicadellidae	Sp32	1	Mt Wilhelm	Malaise	P1039	5732	200	MAL-MW0200C-10/16-d10
TA00357	Cicadellidae	Sp337	2	Mt Wilhelm	Malaise	P1039	5732	200	MAL-MW0200C-10/16-d10
TA00358	Cicadellidae	Sp444	4	Mt Wilhelm	Malaise	P1039	5732	200	MAL-MW0200C-10/16-d10
TA00359	Cicadellidae	Sp487	2	Mt Wilhelm	Malaise	P1039	5732	200	MAL-MW0200C-10/16-d10
TA00360	Cercopidae	Sp495	1	Mt Wilhelm	Malaise	P1040	5723	200	MAL-MW0200C-11/16-d11
TA00361	Cicadellidae	Sp45	1	Mt Wilhelm	Malaise	P1040	5723	200	MAL-MW0200C-11/16-d11
TA00362	Cicadellidae	Sp41	1	Mt Wilhelm	Malaise	P1040	5723	200	MAL-MW0200C-11/16-d11
TA00363	Cicadellidae	Sp590	1	Mt Wilhelm	Malaise	P1040	5723	200	MAL-MW0200C-11/16-d11
TA00364	Cicadellidae	Sp535	1	Mt Wilhelm	Malaise	P1040	5723	200	MAL-MW0200C-11/16-d11
TA00365	Cicadellidae	Sp625	1	Mt Wilhelm	Malaise	P1040	5723	200	MAL-MW0200C-11/16-d11
TA00366	Cicadellidae	Sp337	1	Mt Wilhelm	Malaise	P1040	5723	200	MAL-MW0200C-11/16-d11
TA00367	Cicadellidae	Sp444	4	Mt Wilhelm	Malaise	P1040	5723	200	MAL-MW0200C-11/16-d11
TA00368	Cicadellidae	Sp676	1	Mt Wilhelm	Malaise	P1040	5723	200	MAL-MW0200C-11/16-d11
TA00369	Cicadellidae	Sp677	1	Mt Wilhelm	Malaise	P1040	5723	200	MAL-MW0200C-11/16-d11
TA00370	Cixiidae	Sp664	2	Mt Wilhelm	Malaise	P1041	5716	200	MAL-MW0200C-12/16-d12
TA00371	Cicadellidae	Sp337	1	Mt Wilhelm	Malaise	P1041	5716	200	MAL-MW0200C-12/16-d12
TA00372	Cicadellidae	Sp444	3	Mt Wilhelm	Malaise	P1041	5716	200	MAL-MW0200C-12/16-d12
TA00373	Cicadellidae	Sp337	2	Mt Wilhelm	Malaise	P1042	9688	200	MAL-MW0200C-13/16-d13
TA00374	Cicadellidae	Sp444	5	Mt Wilhelm	Malaise	P1042	9688	200	MAL-MW0200C-13/16-d13
TA00375	Cicadellidae	Sp487	1	Mt Wilhelm	Malaise	P1042	9688	200	MAL-MW0200C-13/16-d13
TA00376	Cicadellidae	Sp478	1	Mt Wilhelm	Malaise	P1042	9688	200	MAL-MW0200C-13/16-d13
TA00377	Cicadellidae	Sp678	1	Mt Wilhelm	Malaise	P1042	9688	200	MAL-MW0200C-13/16-d13
TA00378	Cixiidae	Sp619	1	Mt Wilhelm	Malaise	P1043	9732	200	MAL-MW0200C-14/16-d14
TA00379	Cicadellidae	Sp679	1	Mt Wilhelm	Malaise	P1043	9732	200	MAL-MW0200C-14/16-d14
TA00380	Cicadellidae	Sp478	1	Mt Wilhelm	Malaise	P1043	9732	200	MAL-MW0200C-14/16-d14
TA00381	Cicadellidae	Sp444	4	Mt Wilhelm	Malaise	P1043	9732	200	MAL-MW0200C-14/16-d14
TA00382	Cicadellidae	Sp487	6	Mt Wilhelm	Malaise	P1043	9732	200	MAL-MW0200C-14/16-d14
TA00383	Cicadellidae	Sp625	1	Mt Wilhelm	Malaise	P1043	9732	200	MAL-MW0200C-14/16-d14
TA00384	Cicadellidae	Sp680	1	Mt Wilhelm	Malaise	P1043	9732	200	MAL-MW0200C-14/16-d14
TA00385	Cicadellidae	Sp681	1	Mt Wilhelm	Malaise	P1043	9732	200	MAL-MW0200C-14/16-d14
TA00386	Cicadellidae	Sp682	1	Mt Wilhelm	Malaise	P1043	9732	200	MAL-MW0200C-14/16-d14
TA00387	Cicadellidae	Sp444	3	Mt Wilhelm	Malaise	P1044	9719	200	MAL-MW0200C-15/16-d15
TA00388	Cixiidae	Sp664	4	Mt Wilhelm	Malaise	P1045	9743	200	MAL-MW0200C-16/16-d16
TA00389	Cixiidae	Sp671	1	Mt Wilhelm	Malaise	P1045	9743	200	MAL-MW0200C-16/16-d16
TA00390	Cixiidae	Sp597	1	Mt Wilhelm	Malaise	P1045	9743	200	MAL-MW0200C-16/16-d16
TA00391	Fulgoromorpha (Larve)	Sp683	1	Mt Wilhelm	Malaise	P1045	9743	200	MAL-MW0200C-16/16-d16
TA00392	Cicadellidae	Sp465	1	Mt Wilhelm	Malaise	P1045	9743	200	MAL-MW0200C-16/16-d16
TA00393	Cicadellidae	Sp444	6	Mt Wilhelm	Malaise	P1045	9743	200	MAL-MW0200C-16/16-d16
TA00394	Cicadellidae	Sp337	1	Mt Wilhelm	Malaise	P1045	9743	200	MAL-MW0200C-16/16-d16
TA00395	Cicadellidae	Sp487	4	Mt Wilhelm	Malaise	P1045	9743	200	MAL-MW0200C-16/16-d16
TA00396	Cicadellidae	Sp684	1	Mt Wilhelm	Malaise	P1045	9743	200	MAL-MW0200C-16/16-d16
TA00397	Cicadellidae	Sp644	1	Mt Wilhelm	Malaise	P1045	9743	200	MAL-MW0200C-16/16-d16
TA00398	Cixiidae	Sp619	2	Mt Wilhelm	Malaise	P1046	11864	200	MAL-MW0200D-01/16-d01
TA00399	Delphacidae	Sp685	1	Mt Wilhelm	Malaise	P1046	11864	200	MAL-MW0200D-01/16-d01
TA00400	Derbidae	Sp666	1	Mt Wilhelm	Malaise	P1046	11864	200	MAL-MW0200D-01/16-d01
TA00401	Cicadellidae	Sp678	1	Mt Wilhelm	Malaise	P1046	11864	200	MAL-MW0200D-01/16-d01
TA00402	Cicadellidae	Sp444	3	Mt Wilhelm	Malaise	P1046	11864	200	MAL-MW0200D-01/16-d01
TA00403	Cicadellidae	Sp487	3	Mt Wilhelm	Malaise	P1046	11864	200	MAL-MW0200D-01/16-d01
TA00404	Cixiidae	Sp597	1	Mt Wilhelm	Malaise	P1047	11611	200	MAL-MW0200D-02/16-d02
TA00405	Cicadellidae	Sp444	1	Mt Wilhelm	Malaise	P1047	11611	200	MAL-MW0200D-02/16-d02
TA00406	Cicadellidae	Sp669	1	Mt Wilhelm	Malaise	P1047	11611	200	MAL-MW0200D-02/16-d02
TA00407	Achilidae	Sp627	2	Mt Wilhelm	Malaise	P1048	11602	200	MAL-MW0200D-03/16-d03
TA00408	Cixiidae	Sp597	1	Mt Wilhelm	Malaise	P1048	11602	200	MAL-MW0200D-03/16-d03
TA00409	Cicadellidae	Sp487	3	Mt Wilhelm	Malaise	P1048	11602	200	MAL-MW0200D-03/16-d03
TA00410	Cicadellidae	Sp686	1	Mt Wilhelm	Malaise	P1048	11602	200	MAL-MW0200D-03/16-d03
TA00411	Heteroptera	Sp381	1	Mt Wilhelm	Malaise	P1049	11859	200	MAL-MW0200D-04/16-d04
TA00412	Cixiidae	Sp670	1	Mt Wilhelm	Malaise	P1049	11859	200	MAL-MW0200D-04/16-d04
TA00413	Derbidae	Sp687	2	Mt Wilhelm	Malaise	P1049	11859	200	MAL-MW0200D-04/16-d04
TA00414	Cicadellidae	Sp688	1	Mt Wilhelm	Malaise	P1049	11859	200	MAL-MW0200D-04/16-d04
TA00415	Cicadellidae	Sp661	1	Mt Wilhelm	Malaise	P1049	11859	200	MAL-MW0200D-04/16-d04
TA00416	Cicadellidae	Sp591	1	Mt Wilhelm	Malaise	P1049	11859	200	MAL-MW0200D-04/16-d04
TA00417	Cicadellidae	Sp505	4	Mt Wilhelm	Malaise	P1049	11859	200	MAL-MW0200D-04/16-d04
TA00418	Achilidae	Sp635	1	Mt Wilhelm	Malaise	P1050	5733	200	MAL-MW0200D-05/16-d05
TA00419	Cixiidae	Sp670	1	Mt Wilhelm	Malaise	P1050	5733	200	MAL-MW0200D-05/16-d05
TA00420	Cixiidae	Sp689	1	Mt Wilhelm	Malaise	P1050	5733	200	MAL-MW0200D-05/16-d05
TA00421	Derbidae	Sp690	1	Mt Wilhelm	Malaise	P1050	5733	200	MAL-MW0200D-05/16-d05
TA00422	Derbidae	Sp692	1	Mt Wilhelm	Malaise	P1050	5733	200	MAL-MW0200D-05/16-d05
TA00423	Cicadellidae	Sp7	1	Mt Wilhelm	Malaise	P1050	5733	200	MAL-MW0200D-05/16-d05
TA00424	Cicadellidae	Sp688	1	Mt Wilhelm	Malaise	P1050	5733	200	MAL-MW0200D-05/16-d05
TA00425	Cicadellidae	Sp487	2	Mt Wilhelm	Malaise	P1050	5733	200	MAL-MW0200D-05/16-d05
TA00426	Cicadellidae	Sp691	1	Mt Wilhelm	Malaise	P1050	5733	200	MAL-MW0200D-05/16-d05
TA00427	Heteroptera	Sp381	1	Mt Wilhelm	Malaise	P1051	5713	200	MAL-MW0200D-06/16-d06
TA00428	Derbidae	Sp692	1	Mt Wilhelm	Malaise	P1051	5713	200	MAL-MW0200D-06/16-d06
TA00429	Cixiidae	Sp589	4	Mt Wilhelm	Malaise	P1051	5713	200	MAL-MW0200D-06/16-d06
TA00430	Cixiidae	Sp693	1	Mt Wilhelm	Malaise	P1051	5713	200	MAL-MW0200D-06/16-d06
TA00431	Cicadellidae	Sp7	1	Mt Wilhelm	Malaise	P1051	5713	200	MAL-MW0200D-06/16-d06
TA00432	Cicadellidae	Sp337	1	Mt Wilhelm	Malaise	P1051	5713	200	MAL-MW0200D-06/16-d06
TA00433	Cicadellidae	Sp444	5	Mt Wilhelm	Malaise	P1051	5713	200	MAL-MW0200D-06/16-d06
TA00434	Cicadellidae	Sp487	1	Mt Wilhelm	Malaise	P1051	5713	200	MAL-MW0200D-06/16-d06
TA00435	Derbidae	Sp692	1	Mt Wilhelm	Malaise	P1052	5711	200	MAL-MW0200D-07/16-d07
TA00436	Derbidae	Sp694	1	Mt Wilhelm	Malaise	P1052	5711	200	MAL-MW0200D-07/16-d07
TA00437	Delphacidae	Sp695	1	Mt Wilhelm	Malaise	P1052	5711	200	MAL-MW0200D-07/16-d07
TA00438	Cixiidae	Sp611	1	Mt Wilhelm	Malaise	P1052	5711	200	MAL-MW0200D-07/16-d07
TA00439	Heteroptera	Sp696	1	Mt Wilhelm	Malaise	P1052	5711	200	MAL-MW0200D-07/16-d07
TA00440	Cicadellidae	Sp444	2	Mt Wilhelm	Malaise	P1052	5711	200	MAL-MW0200D-07/16-d07
TA00441	Cicadellidae	Sp487	1	Mt Wilhelm	Malaise	P1052	5711	200	MAL-MW0200D-07/16-d07
TA00442	Cicadellidae	Sp697	1	Mt Wilhelm	Malaise	P1052	5711	200	MAL-MW0200D-07/16-d07
TA00443	Cixiidae	Sp597	2	Mt Wilhelm	Malaise	P1053	5707	200	MAL-MW0200D-08/16-d08
TA00444	Cicadellidae	Sp624	1	Mt Wilhelm	Malaise	P1053	5707	200	MAL-MW0200D-08/16-d08
TA00445	Cicadellidae	Sp661	1	Mt Wilhelm	Malaise	P1053	5707	200	MAL-MW0200D-08/16-d08
TA00446	Cicadellidae	Sp444	1	Mt Wilhelm	Malaise	P1053	5707	200	MAL-MW0200D-08/16-d08
TA00447	Cicadellidae	Sp487	3	Mt Wilhelm	Malaise	P1053	5707	200	MAL-MW0200D-08/16-d08
TA00448	Cicadellidae	Sp698	2	Mt Wilhelm	Malaise	P1053	5707	200	MAL-MW0200D-08/16-d08
TA00449	Cixiidae	Sp592	2	Mt Wilhelm	Malaise	P1054	5739	200	MAL-MW0200D-09/16-d09
TA00450	Cixiidae	Sp589	7	Mt Wilhelm	Malaise	P1054	5739	200	MAL-MW0200D-09/16-d09
TA00451	Cicadellidae	Sp513	1	Mt Wilhelm	Malaise	P1054	5739	200	MAL-MW0200D-09/16-d09
TA00452	Cicadellidae	Sp661	2	Mt Wilhelm	Malaise	P1054	5739	200	MAL-MW0200D-09/16-d09
TA00453	Cicadellidae	Sp12	1	Mt Wilhelm	Malaise	P1054	5739	200	MAL-MW0200D-09/16-d09
TA00454	Cicadellidae	Sp698	1	Mt Wilhelm	Malaise	P1054	5739	200	MAL-MW0200D-09/16-d09
TA00455	Cicadellidae	Sp699	1	Mt Wilhelm	Malaise	P1054	5739	200	MAL-MW0200D-09/16-d09
TA00456	Cicadellidae	Sp444	2	Mt Wilhelm	Malaise	P1054	5739	200	MAL-MW0200D-09/16-d09
TA00457	Cicadellidae	Sp487	3	Mt Wilhelm	Malaise	P1054	5739	200	MAL-MW0200D-09/16-d09
TA00458	Cicadellidae	Sp700	1	Mt Wilhelm	Malaise	P1054	5739	200	MAL-MW0200D-09/16-d09
TA00459	Achilidae	Sp18	1	Mt Wilhelm	Malaise	P1055	11607	200	MAL-MW0200D-10/16-d10
TA00460	Cixiidae	Sp689	2	Mt Wilhelm	Malaise	P1055	11607	200	MAL-MW0200D-10/16-d10
TA00461	Cixiidae	Sp597	1	Mt Wilhelm	Malaise	P1055	11607	200	MAL-MW0200D-10/16-d10
TA00462	Derbidae	Sp701	1	Mt Wilhelm	Malaise	P1055	11607	200	MAL-MW0200D-10/16-d10
TA00463	Cicadellidae	Sp702	1	Mt Wilhelm	Malaise	P1055	11607	200	MAL-MW0200D-10/16-d10
TA00464	Cicadellidae	Sp688	1	Mt Wilhelm	Malaise	P1055	11607	200	MAL-MW0200D-10/16-d10
TA00465	Cicadellidae	Sp698	1	Mt Wilhelm	Malaise	P1055	11607	200	MAL-MW0200D-10/16-d10
TA00466	Cicadellidae	Sp691	1	Mt Wilhelm	Malaise	P1055	11607	200	MAL-MW0200D-10/16-d10
TA00467	Cicadellidae	Sp487	3	Mt Wilhelm	Malaise	P1055	11607	200	MAL-MW0200D-10/16-d10
TA00468	Cicadellidae	Sp703	1	Mt Wilhelm	Malaise	P1055	11607	200	MAL-MW0200D-10/16-d10
TA00469	Achilidae	Sp635	1	Mt Wilhelm	Malaise	P1056	5729	200	MAL-MW0200D-11/16-d11
TA00470	Cixiidae	Sp597	2	Mt Wilhelm	Malaise	P1056	5729	200	MAL-MW0200D-11/16-d11
TA00471	Delphacidae	Sp695	1	Mt Wilhelm	Malaise	P1056	5729	200	MAL-MW0200D-11/16-d11
TA00472	Cicadellidae	Sp7	1	Mt Wilhelm	Malaise	P1056	5729	200	MAL-MW0200D-11/16-d11
TA00473	Cicadellidae	Sp123	1	Mt Wilhelm	Malaise	P1056	5729	200	MAL-MW0200D-11/16-d11
TA00474	Cicadellidae	Sp444	3	Mt Wilhelm	Malaise	P1056	5729	200	MAL-MW0200D-11/16-d11
TA00475	Cicadellidae	Sp487	4	Mt Wilhelm	Malaise	P1056	5729	200	MAL-MW0200D-11/16-d11
TA00476	Cicadellidae	Sp698	2	Mt Wilhelm	Malaise	P1056	5729	200	MAL-MW0200D-11/16-d11
TA00477	Cicadellidae	Sp700	1	Mt Wilhelm	Malaise	P1056	5729	200	MAL-MW0200D-11/16-d11
TA00478	Cicadellidae	Sp584	1	Mt Wilhelm	Malaise	P1056	5729	200	MAL-MW0200D-11/16-d11
TA00479	Cicadellidae	Sp704	1	Mt Wilhelm	Malaise	P1056	5729	200	MAL-MW0200D-11/16-d11
TA00480	Cicadellidae	Sp705	1	Mt Wilhelm	Malaise	P1056	5729	200	MAL-MW0200D-11/16-d11
TA00481	Cixiidae	Sp589	1	Mt Wilhelm	Malaise	P1057	5712	200	MAL-MW0200D-12/16-d12
TA00482	Derbidae	Sp687	1	Mt Wilhelm	Malaise	P1057	5712	200	MAL-MW0200D-12/16-d12
TA00483	Derbidae	Sp598	2	Mt Wilhelm	Malaise	P1057	5712	200	MAL-MW0200D-12/16-d12
TA00484	Cicadellidae	Sp706	1	Mt Wilhelm	Malaise	P1057	5712	200	MAL-MW0200D-12/16-d12
TA00485	Cicadellidae	Sp444	4	Mt Wilhelm	Malaise	P1057	5712	200	MAL-MW0200D-12/16-d12
TA00486	Cicadellidae	Sp487	6	Mt Wilhelm	Malaise	P1057	5712	200	MAL-MW0200D-12/16-d12
TA00487	Achilidae	Sp18	1	Mt Wilhelm	Malaise	P1058	9707	200	MAL-MW0200D-13/16-d13
TA00488	Delphacidae	Sp695	1	Mt Wilhelm	Malaise	P1058	9707	200	MAL-MW0200D-13/16-d13
TA00489	Cixiidae	Sp611	1	Mt Wilhelm	Malaise	P1058	9707	200	MAL-MW0200D-13/16-d13
TA00490	Cixiidae	Sp592	1	Mt Wilhelm	Malaise	P1058	9707	200	MAL-MW0200D-13/16-d13
TA00491	Derbidae	Sp690	1	Mt Wilhelm	Malaise	P1058	9707	200	MAL-MW0200D-13/16-d13
TA00492	Cicadellidae	Sp505	2	Mt Wilhelm	Malaise	P1058	9707	200	MAL-MW0200D-13/16-d13
TA00493	Cicadellidae	Sp487	6	Mt Wilhelm	Malaise	P1058	9707	200	MAL-MW0200D-13/16-d13
TA00494	Cicadellidae	Sp617	1	Mt Wilhelm	Malaise	P1058	9707	200	MAL-MW0200D-13/16-d13
TA00495	Achilidae	Sp18	1	Mt Wilhelm	Malaise	P1059	9734	200	MAL-MW0200D-14/16-d14
TA00496	Cixiidae	Sp597	2	Mt Wilhelm	Malaise	P1059	9734	200	MAL-MW0200D-14/16-d14
TA00497	Delphacidae	Sp695	2	Mt Wilhelm	Malaise	P1059	9734	200	MAL-MW0200D-14/16-d14
TA00498	Cicadellidae	Sp661	5	Mt Wilhelm	Malaise	P1059	9734	200	MAL-MW0200D-14/16-d14
TA00499	Cicadellidae	Sp700	2	Mt Wilhelm	Malaise	P1059	9734	200	MAL-MW0200D-14/16-d14
TA00500	Cicadellidae	Sp688	2	Mt Wilhelm	Malaise	P1059	9734	200	MAL-MW0200D-14/16-d14
TA00501	Cicadellidae	Sp614	1	Mt Wilhelm	Malaise	P1059	9734	200	MAL-MW0200D-14/16-d14
TA00502	Cicadellidae	Sp698	1	Mt Wilhelm	Malaise	P1059	9734	200	MAL-MW0200D-14/16-d14
TA00503	Cicadellidae	Sp703	1	Mt Wilhelm	Malaise	P1059	9734	200	MAL-MW0200D-14/16-d14
TA00504	Cicadellidae	Sp337	1	Mt Wilhelm	Malaise	P1059	9734	200	MAL-MW0200D-14/16-d14
TA00505	Cicadellidae	Sp487	3	Mt Wilhelm	Malaise	P1059	9734	200	MAL-MW0200D-14/16-d14
TA00506	Cicadellidae	Sp707	3	Mt Wilhelm	Malaise	P1059	9734	200	MAL-MW0200D-14/16-d14
TA00507	Cicadellidae	Sp691	1	Mt Wilhelm	Malaise	P1059	9734	200	MAL-MW0200D-14/16-d14
TA00508	Cicadellidae	Sp708	1	Mt Wilhelm	Malaise	P1059	9734	200	MAL-MW0200D-14/16-d14
TA00509	Achilidae	Sp18	2	Mt Wilhelm	Malaise	P1060	9697	200	MAL-MW0200D-15/16-d15
TA00510	Cixiidae	Sp592	1	Mt Wilhelm	Malaise	P1060	9697	200	MAL-MW0200D-15/16-d15
TA00511	Cixiidae	Sp689	1	Mt Wilhelm	Malaise	P1060	9697	200	MAL-MW0200D-15/16-d15
TA00512	Cicadellidae	Sp7	4	Mt Wilhelm	Malaise	P1060	9697	200	MAL-MW0200D-15/16-d15
TA00513	Cicadellidae	Sp29	1	Mt Wilhelm	Malaise	P1060	9697	200	MAL-MW0200D-15/16-d15
TA00514	Cicadellidae	Sp337	1	Mt Wilhelm	Malaise	P1060	9697	200	MAL-MW0200D-15/16-d15
TA00515	Cicadellidae	Sp444	1	Mt Wilhelm	Malaise	P1060	9697	200	MAL-MW0200D-15/16-d15
TA00516	Cicadellidae	Sp591	1	Mt Wilhelm	Malaise	P1060	9697	200	MAL-MW0200D-15/16-d15
TA00517	Cicadellidae	Sp607	1	Mt Wilhelm	Malaise	P1060	9697	200	MAL-MW0200D-15/16-d15
TA00518	Cicadellidae	Sp661	1	Mt Wilhelm	Malaise	P1060	9697	200	MAL-MW0200D-15/16-d15
TA00519	Cicadellidae	Sp688	1	Mt Wilhelm	Malaise	P1060	9697	200	MAL-MW0200D-15/16-d15
TA00520	Fulgoromorpha (Larve)	Sp709	1	Mt Wilhelm	Malaise	P1060	9697	200	MAL-MW0200D-15/16-d15
TA00521	Achilidae	Sp18	1	Mt Wilhelm	Malaise	P1061	9702	200	MAL-MW0200D-16/16-d16
TA00522	Achilidae	Sp581	1	Mt Wilhelm	Malaise	P1061	9702	200	MAL-MW0200D-16/16-d16
TA00523	Cixiidae	Sp689	3	Mt Wilhelm	Malaise	P1061	9702	200	MAL-MW0200D-16/16-d16
TA00524	Heteroptera	Sp381	1	Mt Wilhelm	Malaise	P1061	9702	200	MAL-MW0200D-16/16-d16
TA00525	Cicadellidae	Sp7	1	Mt Wilhelm	Malaise	P1061	9702	200	MAL-MW0200D-16/16-d16
TA00526	Cicadellidae	Sp337	1	Mt Wilhelm	Malaise	P1061	9702	200	MAL-MW0200D-16/16-d16
TA00527	Cicadellidae	Sp444	5	Mt Wilhelm	Malaise	P1061	9702	200	MAL-MW0200D-16/16-d16
TA00528	Cicadellidae	Sp487	5	Mt Wilhelm	Malaise	P1061	9702	200	MAL-MW0200D-16/16-d16
TA00529	Cicadellidae	Sp691	1	Mt Wilhelm	Malaise	P1061	9702	200	MAL-MW0200D-16/16-d16
TA00530	Cicadellidae	Sp710	1	Mt Wilhelm	Malaise	P1061	9702	200	MAL-MW0200D-16/16-d16
TA00531	Cicadellidae	Sp645	1	Mt Wilhelm	Malaise	P1061	9702	200	MAL-MW0200D-16/16-d16
TA00532	Cicadellidae	Sp712	2	Mt Wilhelm	Malaise	P1061	9702	200	MAL-MW0200D-16/16-d16
TA00533	Fulgoromorpha (Larve)	Sp713	1	Mt Wilhelm	Malaise	P1061	9702	200	MAL-MW0200D-16/16-d16
	Total different species	150		Total Abundance	1632
	Total cicadellidae species	97		Total cicadellidae	1390
	Total achilidae species	6		Total Fulgoromorpha	209
	Total cixiidae species	15
	Total derbidae species	17		Total major sp (sp444)	562
	Total delphacidae species	3		% total	0.344363
	Total cercopidae species	1		% cicadellidae	0.404317
	Cixiidae	92		Total major sp (sp487)	508
	Heteroptera	10		% total	0.311275
	Derbidae	32		% cicadellidae	0.365468
	Delphacidae	8
	Fulgoromorpha	20
	Achilidae	41
	Cercopidae	2
	Meenoplidae	33
	Flatidae	1

## Sheet: Totaux
	Total species	713
	Total species (Mt Wilhelm)	558
	Total abundance	4228
	Total abundance (Mt Wilhelm)	3376
		Altitude	200	700	1200	1700	2200	2700	3200	3700
		Plot A	0.411765	0.160804	0.225564	0.420139	0.521429	0.276423	0.240625	0.296296
		Plot B	0.324755	0.370184	0.255639	0.267361	0.128571	0.203252	0.03125	0.296296
		Plot C	0.126225	0.175879	0.165414	0.100694	0.0785714	0.0894309	0.215625	0.240741
		Plot D	0.137255	0.293132	0.353383	0.211806	0.271429	0.430894	0.5125	0.166667
